# Supplementary material for: Transcriptome and Metabolome Analysis Unveil Anthocyanin Metabolism in Pink and Red Testa of Peanut (Arachis hypogaea L.)
Source: Hindawi journal article supplement (doi:10.1155/2021/5883901), 2021-08-06
Supplement: f1 [file 5883901.f1.zip]

Table S4 Statistics of GO Enrichment in the testa of R4 and R7 stages of Shanhu

| Ontology           | ID        | Description                       | GeneRatio | BgRatio   | pvalue   | p.adjust | qvalue   | geneID      |
|--------------------|-----------|-----------------------------------|-----------|-----------|----------|----------|----------|-------------|
| Cellular component | GO:004255 | MCM complex                       | 10/1904   | 16/28537  | 9.43E-09 | 3.05E-06 | 3.05E-06 | arahy.Tifru |
| Cellular component | GO:000034 | THO complex                       | 9/1904    | 29/28537  | 7.57E-05 | 0.01223  | 0.01223  | arahy.Tifru |
| Molecular function | GO:005035 | trihydroxyketone lyase            | 26/1903   | 51/27490  | 2.71E-17 | 2.27E-14 | 2.14E-14 | arahy.Tifru |
| Molecular function | GO:001670 | oxidoreductase                    | 51/1903   | 324/27490 | 3.17E-08 | 1.32E-05 | 1.25E-05 | arahy.Tifru |
| Molecular function | GO:010248 | scopolinase                       | 12/1903   | 54/27490  | 0.000262 | 0.073035 | 0.068796 | arahy.Tifru |
| Molecular function | GO:000842 | beta-glucosidase                  | 24/1903   | 170/27490 | 0.000684 | 0.115688 | 0.108973 | arahy.Tifru |
| Molecular function | GO:005066 | flavin adenine oxidoreductase     | 32/1903   | 255/27490 | 0.000819 | 0.115688 | 0.108973 | arahy.Tifru |
| Molecular function | GO:001017 | IAA-amino acid oxidase            | 5/1903    | 12/27490  | 0.000829 | 0.115688 | 0.108973 | arahy.Tifru |
| Molecular function | GO:000445 | N,N-dimethylglycine decarboxylase | 9/1903    | 42/27490  | 0.001981 | 0.221691 | 0.208824 | arahy.Tifru |
| Molecular function | GO:001592 | glucosidase                       | 27/1903   | 216/27490 | 0.002119 | 0.221691 | 0.208824 | arahy.Tifru |
| Molecular function | GO:001517 | amino acid oxidase                | 24/1903   | 186/27490 | 0.002389 | 0.222141 | 0.209248 | arahy.Tifru |
| Molecular function | GO:001915 | cytokinin deaminase               | 6/1903    | 22/27490  | 0.003104 | 0.259779 | 0.244702 | arahy.Tifru |
| Molecular function | GO:001525 | antiporter                        | 37/1903   | 337/27490 | 0.003767 | 0.265151 | 0.249762 | arahy.Tifru |
| Molecular function | GO:001664 | oxidoreductase                    | 12/1903   | 73/27490  | 0.004159 | 0.265151 | 0.249762 | arahy.Tifru |
| Molecular function | GO:005111 | sugar transporter                 | 19/1903   | 142/27490 | 0.00432  | 0.265151 | 0.249762 | arahy.Tifru |
| Molecular function | GO:000371 | transcription factor              | 9/1903    | 47/27490  | 0.004435 | 0.265151 | 0.249762 | arahy.Tifru |
| Molecular function | GO:000481 | aspartate decarboxylase           | 14/1903   | 11/27490  | 0.00509  | 0.284046 | 0.26756  | arahy.Tifru |
| Molecular function | GO:000825 | exopeptidase                      | 22/1903   | 180/27490 | 0.006747 | 0.302199 | 0.284659 | arahy.Tifru |
| Molecular function | GO:008004 | quercetin 3-O-methyltransferase   | 18/1903   | 138/27490 | 0.007007 | 0.302199 | 0.284659 | arahy.Tifru |
| Molecular function | GO:001626 | 4-coumarate 3-hydroxylase         | 4/1903    | 12/27490  | 0.007221 | 0.302199 | 0.284659 | arahy.Tifru |
| Molecular function | GO:005036 | L-tryptophan 5-hydroxylase        | 4/1903    | 12/27490  | 0.007221 | 0.302199 | 0.284659 | arahy.Tifru |
| Molecular function | GO:007052 | L-tryptophan 5-hydroxylase        | 4/1903    | 12/27490  | 0.007221 | 0.302199 | 0.284659 | arahy.Tifru |
| Molecular function | GO:008004 | quercetin 3-O-methyltransferase   | 18/1903   | 140/27490 | 0.008111 | 0.32329  | 0.304527 | arahy.Tifru |
| Molecular function | GO:000467 | transmembrane protein             | 42/1903   | 415/27490 | 0.008857 | 0.335552 | 0.316077 | arahy.Tifru |
| Molecular function | GO:001025 | (+)-abscisic acid oxidase         | 4/1903    | 13/27490  | 0.009865 | 0.335552 | 0.316077 | arahy.Tifru |
| Molecular function | GO:004642 | allene-oxidase                    | 4/1903    | 13/27490  | 0.009865 | 0.335552 | 0.316077 | arahy.Tifru |
| Molecular function | GO:001662 | cinnamoyl-CoA ligase              | 5/1903    | 20/27490  | 0.010199 | 0.335552 | 0.316077 | arahy.Tifru |
| Molecular function | GO:001525 | symporter                         | 36/1903   | 349/27490 | 0.011018 | 0.335552 | 0.316077 | arahy.Tifru |
| Molecular function | GO:000402 | alcohol dehydrogenase             | 8/1903    | 45/27490  | 0.011225 | 0.335552 | 0.316077 | arahy.Tifru |
| Molecular function | GO:001664 | oxidoreductase                    | 8/1903    | 45/27490  | 0.011225 | 0.335552 | 0.316077 | arahy.Tifru |
| Molecular function | GO:001683 | aldehyde dehydrogenase            | 7/1903    | 37/27490  | 0.012364 | 0.341747 | 0.321912 | arahy.Tifru |
| Molecular function | GO:000545 | monovalent cation transporter     | 6/1903    | 29/27490  | 0.013048 | 0.341747 | 0.321912 | arahy.Tifru |
| Molecular function | GO:001538 | potassium ion transporter         | 6/1903    | 29/27490  | 0.013048 | 0.341747 | 0.321912 | arahy.Tifru |
| Molecular function | GO:012005 | jasmonic acid oxidase             | 4/1903    | 14/27490  | 0.013066 | 0.341747 | 0.321912 | arahy.Tifru |
| Molecular function | GO:001662 | oxidoreductase                    | 16/1903   | 126/27490 | 0.013518 | 0.342855 | 0.322956 | arahy.Tifru |
| Molecular function | GO:001525 | drug transporter                  | 29/1903   | 275/27490 | 0.015873 | 0.38735  | 0.364869 | arahy.Tifru |
| Molecular function | GO:001545 | cation:anion symporter            | 8/1903    | 48/27490  | 0.016371 | 0.38735  | 0.364869 | arahy.Tifru |
| Molecular function | GO:001661 | oxidoreductase                    | 46/1903   | 481/27490 | 0.01666  | 0.38735  | 0.364869 | arahy.Tifru |
| Molecular function | GO:000534 | organic acid transporter          | 33/1903   | 326/27490 | 0.018547 | 0.39988  | 0.376671 | arahy.Tifru |
| Molecular function | GO:004694 | carboxylic acid transporter       | 33/1903   | 326/27490 | 0.018547 | 0.39988  | 0.376671 | arahy.Tifru |
| Molecular function | GO:000815 | primary amine oxidase             | 5/1903    | 23/27490  | 0.018632 | 0.39988  | 0.376671 | arahy.Tifru |
| Molecular function | GO:001915 | transmembrane protein             | 43/1903   | 449/27490 | 0.019645 | 0.411074 | 0.387215 | arahy.Tifru |
| Molecular function | GO:005066 | NADP binding oxidoreductase       | 16/1903   | 132/27490 | 0.020294 | 0.414296 | 0.390251 | arahy.Tifru |
| Molecular function | GO:001514 | carbohydrate transporter          | 22/1903   | 200/27490 | 0.021269 | 0.423853 | 0.399253 | arahy.Tifru |
| Molecular function | GO:001662 | oxidoreductase                    | 10/1903   | 70/27490  | 0.021843 | 0.425168 | 0.400491 | arahy.Tifru |
| Molecular function | GO:000468 | calmodulin-binding protein        | 9/1903    | 62/27490  | 0.026195 | 0.453219 | 0.426914 | arahy.Tifru |
| Molecular function | GO:000535 | galactose transporter             | 4/1903    | 17/27490  | 0.026323 | 0.453219 | 0.426914 | arahy.Tifru |
| Molecular function | GO:001664 | oxidoreductase                    | 4/1903    | 17/27490  | 0.026323 | 0.453219 | 0.426914 | arahy.Tifru |

|           |           |               |         |           |          |          |          |             |
|-----------|-----------|---------------|---------|-----------|----------|----------|----------|-------------|
| Molecular | GO:001507 | proton tra    | 37/1903 | 384/27490 | 0.026459 | 0.453219 | 0.426914 | arahy.Tifru |
| Molecular | GO:000519 | structural c  | 3/1903  | 10/27490  | 0.0275   | 0.453219 | 0.426914 | arahy.Tifru |
| Molecular | GO:002282 | potassium     | 6/1903  | 34/27490  | 0.027552 | 0.453219 | 0.426914 | arahy.Tifru |
| Molecular | GO:000417 | aminopept     | 9/1903  | 63/27490  | 0.02875  | 0.453219 | 0.426914 | arahy.Tifru |
| Molecular | GO:000111 | transcripti   | 20/1903 | 184/27490 | 0.030291 | 0.453219 | 0.426914 | arahy.Tifru |
| Molecular | GO:000111 | transcripti   | 20/1903 | 184/27490 | 0.030291 | 0.453219 | 0.426914 | arahy.Tifru |
| Molecular | GO:001640 | CoA-ligase    | 8/1903  | 54/27490  | 0.031398 | 0.453219 | 0.426914 | arahy.Tifru |
| Molecular | GO:000524 | voltage-gai   | 9/1903  | 64/27490  | 0.031475 | 0.453219 | 0.426914 | arahy.Tifru |
| Molecular | GO:000387 | AMP deam      | 3/1903  | 11/27490  | 0.035904 | 0.453219 | 0.426914 | arahy.Tifru |
| Molecular | GO:000402 | adenylylsu    | 3/1903  | 11/27490  | 0.035904 | 0.453219 | 0.426914 | arahy.Tifru |
| Molecular | GO:000824 | tripeptidyl   | 3/1903  | 11/27490  | 0.035904 | 0.453219 | 0.426914 | arahy.Tifru |
| Molecular | GO:004762 | adenosine-    | 3/1903  | 11/27490  | 0.035904 | 0.453219 | 0.426914 | arahy.Tifru |
| Molecular | GO:199011 | plant seed    | 3/1903  | 11/27490  | 0.035904 | 0.453219 | 0.426914 | arahy.Tifru |
| Molecular | GO:001507 | potassium     | 17/1903 | 153/27490 | 0.036187 | 0.453219 | 0.426914 | arahy.Tifru |
| Molecular | GO:000991 | calcium-de    | 9/1903  | 66/27490  | 0.037451 | 0.453219 | 0.426914 | arahy.Tifru |
| Molecular | GO:001081 | calcium-de    | 9/1903  | 66/27490  | 0.037451 | 0.453219 | 0.426914 | arahy.Tifru |
| Molecular | GO:003051 | cyclic nucl   | 7/1903  | 46/27490  | 0.037578 | 0.453219 | 0.426914 | arahy.Tifru |
| Molecular | GO:003051 | cAMP bind     | 7/1903  | 46/27490  | 0.037578 | 0.453219 | 0.426914 | arahy.Tifru |
| Molecular | GO:003051 | cGMP bind     | 7/1903  | 46/27490  | 0.037578 | 0.453219 | 0.426914 | arahy.Tifru |
| Molecular | GO:000391 | acetyl-CoA    | 4/1903  | 19/27490  | 0.038419 | 0.453219 | 0.426914 | arahy.Tifru |
| Molecular | GO:010307 | indole-3-py   | 4/1903  | 19/27490  | 0.038419 | 0.453219 | 0.426914 | arahy.Tifru |
| Molecular | GO:001514 | monosacch     | 13/1903 | 110/27490 | 0.040661 | 0.453219 | 0.426914 | arahy.Tifru |
| Molecular | GO:000552 | macrolide     | 5/1903  | 28/27490  | 0.040942 | 0.453219 | 0.426914 | arahy.Tifru |
| Molecular | GO:000552 | FK506 binc    | 5/1903  | 28/27490  | 0.040942 | 0.453219 | 0.426914 | arahy.Tifru |
| Molecular | GO:000531 | carbohydr     | 15/1903 | 133/27490 | 0.042073 | 0.453219 | 0.426914 | arahy.Tifru |
| Molecular | GO:000540 | carbohydr     | 15/1903 | 133/27490 | 0.042073 | 0.453219 | 0.426914 | arahy.Tifru |
| Molecular | GO:005121 | dioxygenas    | 30/1903 | 312/27490 | 0.043076 | 0.453219 | 0.426914 | arahy.Tifru |
| Molecular | GO:009951 | ion antipor   | 11/1903 | 89/27490  | 0.043166 | 0.453219 | 0.426914 | arahy.Tifru |
| Molecular | GO:002284 | voltage-gai   | 9/1903  | 68/27490  | 0.044157 | 0.453219 | 0.426914 | arahy.Tifru |
| Molecular | GO:000851 | organic ani   | 38/1903 | 413/27490 | 0.045216 | 0.453219 | 0.426914 | arahy.Tifru |
| Molecular | GO:001514 | pentose tr    | 3/1903  | 12/27490  | 0.045465 | 0.453219 | 0.426914 | arahy.Tifru |
| Molecular | GO:001514 | D-xylose tr   | 3/1903  | 12/27490  | 0.045465 | 0.453219 | 0.426914 | arahy.Tifru |
| Molecular | GO:001557 | mannitol tr   | 3/1903  | 12/27490  | 0.045465 | 0.453219 | 0.426914 | arahy.Tifru |
| Molecular | GO:001557 | sorbitol tr   | 3/1903  | 12/27490  | 0.045465 | 0.453219 | 0.426914 | arahy.Tifru |
| Molecular | GO:001551 | D-ribose tr   | 3/1903  | 12/27490  | 0.045465 | 0.453219 | 0.426914 | arahy.Tifru |
| Molecular | GO:001684 | 1-aminocy     | 3/1903  | 12/27490  | 0.045465 | 0.453219 | 0.426914 | arahy.Tifru |
| Molecular | GO:005051 | desacetoxy    | 4/1903  | 20/27490  | 0.045474 | 0.453219 | 0.426914 | arahy.Tifru |
| Molecular | GO:001687 | acid-thiol li | 8/1903  | 58/27490  | 0.045484 | 0.453219 | 0.426914 | arahy.Tifru |
| Molecular | GO:001984 | isoprenoid    | 5/1903  | 29/27490  | 0.046753 | 0.46038  | 0.43366  | arahy.Tifru |
| Molecular | GO:004262 | ATPase act    | 40/1903 | 440/27490 | 0.047653 | 0.463785 | 0.436867 | arahy.Tifru |
| Molecular | GO:001684 | carbon-sul    | 8/1903  | 59/27490  | 0.049561 | 0.475417 | 0.447825 | arahy.Tifru |
| Molecular | GO:001514 | polyol tran   | 6/1903  | 39/27490  | 0.049984 | 0.475417 | 0.447825 | arahy.Tifru |
| Molecular | GO:001540 | P-P-bond-h    | 43/1903 | 481/27490 | 0.051659 | 0.475627 | 0.448022 | arahy.Tifru |
| Molecular | GO:000411 | aspartic-ty   | 13/1903 | 114/27490 | 0.051737 | 0.475627 | 0.448022 | arahy.Tifru |
| Molecular | GO:007000 | aspartic-ty   | 13/1903 | 114/27490 | 0.051737 | 0.475627 | 0.448022 | arahy.Tifru |
| Molecular | GO:001690 | oxidoreduc    | 18/1903 | 172/27490 | 0.052279 | 0.475627 | 0.448022 | arahy.Tifru |
| Molecular | GO:010281 | geraniol 1C   | 5/1903  | 30/27490  | 0.053028 | 0.477253 | 0.449553 | arahy.Tifru |
| Molecular | GO:001521 | solute:prot   | 17/1903 | 161/27490 | 0.054185 | 0.479523 | 0.451692 | arahy.Tifru |
| Molecular | GO:001521 | solute:cati   | 12/1903 | 104/27490 | 0.055734 | 0.479523 | 0.451692 | arahy.Tifru |
| Molecular | GO:001531 | primary ac    | 43/1903 | 484/27490 | 0.055972 | 0.479523 | 0.451692 | arahy.Tifru |

|            |           |              |         |           |          |          |          |             |
|------------|-----------|--------------|---------|-----------|----------|----------|----------|-------------|
| Molecular  | GO:003389 | ribonuclea   | 3/1903  | 13/27490  | 0.056145 | 0.479523 | 0.451692 | arahy.Tifru |
| Molecular  | GO:004659 | mandeloni    | 3/1903  | 13/27490  | 0.056145 | 0.479523 | 0.451692 | arahy.Tifru |
| Biological | GO:000626 | DNA unwir    | 8/1795  | 11/26646  | 5.74E-08 | 0.000131 | 0.000126 | arahy.Tifru |
| Biological | GO:000969 | phenylpro    | 42/1795 | 297/26646 | 4.27E-06 | 0.003886 | 0.003742 | arahy.Tifru |
| Biological | GO:004459 | secondary    | 58/1795 | 467/26646 | 5.09E-06 | 0.003886 | 0.003742 | arahy.Tifru |
| Biological | GO:000689 | drug trans   | 22/1795 | 123/26646 | 2.31E-05 | 0.013221 | 0.012732 | arahy.Tifru |
| Biological | GO:200002 | regulation   | 13/1795 | 52/26646  | 2.99E-05 | 0.013691 | 0.013185 | arahy.Tifru |
| Biological | GO:000989 | auxin bios   | 18/1795 | 94/26646  | 4.92E-05 | 0.016743 | 0.016123 | arahy.Tifru |
| Biological | GO:005506 | monovaler    | 25/1795 | 157/26646 | 5.12E-05 | 0.016743 | 0.016123 | arahy.Tifru |
| Biological | GO:000989 | auxin met    | 21/1795 | 129/26646 | 0.000144 | 0.04112  | 0.039598 | arahy.Tifru |
| Biological | GO:000836 | isoprenoid   | 9/1795  | 32/26646  | 0.00019  | 0.048328 | 0.04654  | arahy.Tifru |
| Biological | GO:003256 | DNA duple    | 8/1795  | 26/26646  | 0.000218 | 0.049829 | 0.047985 | arahy.Tifru |
| Biological | GO:004362 | regulation   | 5/1795  | 10/26646  | 0.000261 | 0.049911 | 0.048064 | arahy.Tifru |
| Biological | GO:000333 | amino acid   | 19/1795 | 116/26646 | 0.000269 | 0.049911 | 0.048064 | arahy.Tifru |
| Biological | GO:000969 | response t   | 39/1795 | 322/26646 | 0.000283 | 0.049911 | 0.048064 | arahy.Tifru |
| Biological | GO:000969 | phenylpro    | 31/1795 | 237/26646 | 0.000306 | 0.050023 | 0.048172 | arahy.Tifru |
| Biological | GO:004851 | rhythmic p   | 38/1795 | 314/26646 | 0.000342 | 0.051668 | 0.049756 | arahy.Tifru |
| Biological | GO:001611 | terpenoid    | 8/1795  | 28/26646  | 0.000384 | 0.051668 | 0.049756 | arahy.Tifru |
| Biological | GO:003239 | DNA geom     | 8/1795  | 28/26646  | 0.000384 | 0.051668 | 0.049756 | arahy.Tifru |
| Biological | GO:004234 | indole gluc  | 7/1795  | 22/26646  | 0.000431 | 0.053605 | 0.051621 | arahy.Tifru |
| Biological | GO:003006 | cellular mc  | 15/1795 | 84/26646  | 0.00045  | 0.053605 | 0.051621 | arahy.Tifru |
| Biological | GO:004244 | hormone t    | 46/1795 | 412/26646 | 0.000542 | 0.053605 | 0.051621 | arahy.Tifru |
| Biological | GO:000693 | chemotaxi    | 10/1795 | 44/26646  | 0.000562 | 0.053605 | 0.051621 | arahy.Tifru |
| Biological | GO:001018 | pollen tub   | 10/1795 | 44/26646  | 0.000562 | 0.053605 | 0.051621 | arahy.Tifru |
| Biological | GO:004233 | taxis        | 10/1795 | 44/26646  | 0.000562 | 0.053605 | 0.051621 | arahy.Tifru |
| Biological | GO:005099 | positive ch  | 10/1795 | 44/26646  | 0.000562 | 0.053605 | 0.051621 | arahy.Tifru |
| Biological | GO:003102 | nuclear mi   | 5/1795  | 12/26646  | 0.000732 | 0.062107 | 0.059809 | arahy.Tifru |
| Biological | GO:009951 | actin filam  | 5/1795  | 12/26646  | 0.000732 | 0.062107 | 0.059809 | arahy.Tifru |
| Biological | GO:000627 | DNA replic   | 9/1795  | 38/26646  | 0.000765 | 0.062107 | 0.059809 | arahy.Tifru |
| Biological | GO:000968 | indoleacet   | 7/1795  | 24/26646  | 0.000777 | 0.062107 | 0.059809 | arahy.Tifru |
| Biological | GO:000686 | amino acid   | 25/1795 | 187/26646 | 0.000812 | 0.062107 | 0.059809 | arahy.Tifru |
| Biological | GO:005507 | potassium    | 11/1795 | 54/26646  | 0.000814 | 0.062107 | 0.059809 | arahy.Tifru |
| Biological | GO:001589 | drug trans   | 23/1795 | 167/26646 | 0.000855 | 0.063134 | 0.060798 | arahy.Tifru |
| Biological | GO:005508 | cation hor   | 46/1795 | 423/26646 | 0.000947 | 0.066418 | 0.063961 | arahy.Tifru |
| Biological | GO:000969 | response t   | 40/1795 | 354/26646 | 0.000957 | 0.066418 | 0.063961 | arahy.Tifru |
| Biological | GO:000016 | sulfate assi | 6/1795  | 19/26646  | 0.001171 | 0.078888 | 0.075969 | arahy.Tifru |
| Biological | GO:001026 | response t   | 23/1795 | 172/26646 | 0.001281 | 0.081154 | 0.078151 | arahy.Tifru |
| Biological | GO:004244 | hormone c    | 11/1795 | 57/26646  | 0.001303 | 0.081154 | 0.078151 | arahy.Tifru |
| Biological | GO:000968 | indoleacet   | 7/1795  | 26/26646  | 0.001311 | 0.081154 | 0.078151 | arahy.Tifru |
| Biological | GO:003479 | cellular ho  | 15/1795 | 94/26646  | 0.0015   | 0.090415 | 0.08707  | arahy.Tifru |
| Biological | GO:000983 | fruit ripeni | 12/1795 | 67/26646  | 0.001579 | 0.092742 | 0.08931  | arahy.Tifru |
| Biological | GO:190542 | regulation   | 6/1795  | 21/26646  | 0.002085 | 0.11431  | 0.11008  | arahy.Tifru |
| Biological | GO:001001 | root morpl   | 45/1795 | 428/26646 | 0.00209  | 0.11431  | 0.11008  | arahy.Tifru |
| Biological | GO:000694 | syncytium    | 7/1795  | 28/26646  | 0.002097 | 0.11431  | 0.11008  | arahy.Tifru |
| Biological | GO:000979 | indole gluc  | 5/1795  | 15/26646  | 0.00234  | 0.121784 | 0.117278 | arahy.Tifru |
| Biological | GO:003076 | cytoskelet   | 5/1795  | 15/26646  | 0.00234  | 0.121784 | 0.117278 | arahy.Tifru |
| Biological | GO:004856 | embryonic    | 13/1795 | 80/26646  | 0.002557 | 0.129196 | 0.124416 | arahy.Tifru |
| Biological | GO:004001 | locomotio    | 11/1795 | 62/26646  | 0.002636 | 0.129196 | 0.124416 | arahy.Tifru |
| Biological | GO:001024 | response t   | 37/1795 | 339/26646 | 0.002652 | 0.129196 | 0.124416 | arahy.Tifru |
| Biological | GO:000762 | circadian rl | 32/1795 | 283/26646 | 0.002885 | 0.137632 | 0.132539 | arahy.Tifru |

|            |                         |         |           |          |          |          |             |
|------------|-------------------------|---------|-----------|----------|----------|----------|-------------|
| Biological | GO:000705 nuclear mi    | 5/1795  | 16/26646  | 0.003216 | 0.145239 | 0.139865 | arahy.Tifru |
| Biological | GO:005164 nucleus loc   | 5/1795  | 16/26646  | 0.003216 | 0.145239 | 0.139865 | arahy.Tifru |
| Biological | GO:004427 sulfur com    | 29/1795 | 251/26646 | 0.003235 | 0.145239 | 0.139865 | arahy.Tifru |
| Biological | GO:003064 regulation    | 11/1795 | 65/26646  | 0.00386  | 0.166768 | 0.160597 | arahy.Tifru |
| Biological | GO:005145 regulation    | 11/1795 | 65/26646  | 0.00386  | 0.166768 | 0.160597 | arahy.Tifru |
| Biological | GO:000980 lignin biosy  | 17/1795 | 124/26646 | 0.004004 | 0.1698   | 0.163516 | arahy.Tifru |
| Biological | GO:007145 cellular res  | 6/1795  | 24/26646  | 0.004347 | 0.180977 | 0.17428  | arahy.Tifru |
| Biological | GO:003006 cellular cat  | 28/1795 | 246/26646 | 0.004635 | 0.188865 | 0.181876 | arahy.Tifru |
| Biological | GO:009877 inorganic in  | 46/1795 | 460/26646 | 0.004876 | 0.188865 | 0.181876 | arahy.Tifru |
| Biological | GO:004243 indole-con    | 14/1795 | 96/26646  | 0.004935 | 0.188865 | 0.181876 | arahy.Tifru |
| Biological | GO:005082 response to   | 9/1795  | 49/26646  | 0.004948 | 0.188865 | 0.181876 | arahy.Tifru |
| Biological | GO:009042 embryonic     | 9/1795  | 49/26646  | 0.004948 | 0.188865 | 0.181876 | arahy.Tifru |
| Biological | GO:190382 organic aci   | 20/1795 | 159/26646 | 0.005186 | 0.191556 | 0.184468 | arahy.Tifru |
| Biological | GO:190503 carboxylic    | 20/1795 | 159/26646 | 0.005186 | 0.191556 | 0.184468 | arahy.Tifru |
| Biological | GO:000688 regulation    | 15/1795 | 107/26646 | 0.005378 | 0.195468 | 0.188235 | arahy.Tifru |
| Biological | GO:000956 fertilization | 9/1795  | 50/26646  | 0.005682 | 0.203291 | 0.195769 | arahy.Tifru |
| Biological | GO:005248 defense re    | 9/1795  | 51/26646  | 0.006496 | 0.22308  | 0.214825 | arahy.Tifru |
| Biological | GO:005254 defense re    | 9/1795  | 51/26646  | 0.006496 | 0.22308  | 0.214825 | arahy.Tifru |
| Biological | GO:003629 cellular res  | 6/1795  | 26/26646  | 0.006624 | 0.22308  | 0.214825 | arahy.Tifru |
| Biological | GO:007145 cellular res  | 6/1795  | 26/26646  | 0.006624 | 0.22308  | 0.214825 | arahy.Tifru |
| Biological | GO:005109 regulation    | 5/1795  | 19/26646  | 0.00723  | 0.237251 | 0.228472 | arahy.Tifru |
| Biological | GO:000980 lignin met    | 19/1795 | 153/26646 | 0.007252 | 0.237251 | 0.228472 | arahy.Tifru |
| Biological | GO:003134 negative re   | 20/1795 | 165/26646 | 0.007789 | 0.249215 | 0.239993 | arahy.Tifru |
| Biological | GO:005254 defense re    | 12/1795 | 81/26646  | 0.007836 | 0.249215 | 0.239993 | arahy.Tifru |
| Biological | GO:000960 response to   | 4/1795  | 13/26646  | 0.008969 | 0.270252 | 0.260252 | arahy.Tifru |
| Biological | GO:001610 sesquiterp    | 4/1795  | 13/26646  | 0.008969 | 0.270252 | 0.260252 | arahy.Tifru |
| Biological | GO:004329 apocaroten    | 4/1795  | 13/26646  | 0.008969 | 0.270252 | 0.260252 | arahy.Tifru |
| Biological | GO:004634 abscisic aci  | 4/1795  | 13/26646  | 0.008969 | 0.270252 | 0.260252 | arahy.Tifru |
| Biological | GO:000982 cytokinin c   | 5/1795  | 20/26646  | 0.009114 | 0.271062 | 0.261032 | arahy.Tifru |
| Biological | GO:190382 regulation    | 9/1795  | 55/26646  | 0.010675 | 0.313408 | 0.301811 | arahy.Tifru |
| Biological | GO:005506 metal ion b   | 34/1795 | 334/26646 | 0.010882 | 0.315435 | 0.303763 | arahy.Tifru |
| Biological | GO:001584 organic aci   | 32/1795 | 311/26646 | 0.011402 | 0.322351 | 0.310423 | arahy.Tifru |
| Biological | GO:004694 carboxylic    | 32/1795 | 311/26646 | 0.011402 | 0.322351 | 0.310423 | arahy.Tifru |
| Biological | GO:000188 selenium c    | 4/1795  | 14/26646  | 0.011896 | 0.324764 | 0.312746 | arahy.Tifru |
| Biological | GO:003006 cellular poi  | 4/1795  | 14/26646  | 0.011896 | 0.324764 | 0.312746 | arahy.Tifru |
| Biological | GO:005508 cellular che  | 31/1795 | 300/26646 | 0.011913 | 0.324764 | 0.312746 | arahy.Tifru |
| Biological | GO:000986 jasmonic a    | 22/1795 | 195/26646 | 0.012277 | 0.328149 | 0.316007 | arahy.Tifru |
| Biological | GO:000687 cellular ion  | 28/1795 | 265/26646 | 0.012324 | 0.328149 | 0.316007 | arahy.Tifru |
| Biological | GO:000283 negative re   | 9/1795  | 57/26646  | 0.013399 | 0.344748 | 0.331992 | arahy.Tifru |
| Biological | GO:003210 negative re   | 9/1795  | 57/26646  | 0.013399 | 0.344748 | 0.331992 | arahy.Tifru |
| Biological | GO:004390 negative re   | 9/1795  | 57/26646  | 0.013399 | 0.344748 | 0.331992 | arahy.Tifru |
| Biological | GO:004835 mucilage b    | 5/1795  | 22/26646  | 0.013842 | 0.348329 | 0.33544  | arahy.Tifru |
| Biological | GO:200006 regulation    | 5/1795  | 22/26646  | 0.013842 | 0.348329 | 0.33544  | arahy.Tifru |
| Biological | GO:000968 induced sy    | 11/1795 | 78/26646  | 0.01515  | 0.36667  | 0.353103 | arahy.Tifru |
| Biological | GO:006034 regulation    | 11/1795 | 78/26646  | 0.01515  | 0.36667  | 0.353103 | arahy.Tifru |
| Biological | GO:005508 lipid home    | 10/1795 | 68/26646  | 0.015237 | 0.36667  | 0.353103 | arahy.Tifru |
| Biological | GO:008016 response to   | 20/1795 | 176/26646 | 0.015251 | 0.36667  | 0.353103 | arahy.Tifru |
| Biological | GO:000223 defense re    | 4/1795  | 15/26646  | 0.015371 | 0.36667  | 0.353103 | arahy.Tifru |
| Biological | GO:007169 anatomica     | 33/1795 | 331/26646 | 0.015881 | 0.374922 | 0.361049 | arahy.Tifru |
| Biological | GO:003238 regulation    | 8/1795  | 50/26646  | 0.017798 | 0.408909 | 0.393779 | arahy.Tifru |

|                                     |         |           |          |          |          |             |
|-------------------------------------|---------|-----------|----------|----------|----------|-------------|
| Biological   GO:190267 negative re  | 39/1795 | 409/26646 | 0.018345 | 0.408909 | 0.393779 | arahy.Tifru |
| Biological   GO:190356 negative re  | 39/1795 | 409/26646 | 0.018345 | 0.408909 | 0.393779 | arahy.Tifru |
| Biological   GO:005238 cell wall th | 10/1795 | 70/26646  | 0.018429 | 0.408909 | 0.393779 | arahy.Tifru |
| Biological   GO:005252 callose de   | 10/1795 | 70/26646  | 0.018429 | 0.408909 | 0.393779 | arahy.Tifru |
| Biological   GO:001007 primary sh   | 7/1795  | 41/26646  | 0.018571 | 0.408909 | 0.393779 | arahy.Tifru |
| Biological   GO:001026 brassinost   | 7/1795  | 41/26646  | 0.018571 | 0.408909 | 0.393779 | arahy.Tifru |
| Biological   GO:000907 aromatic a   | 19/1795 | 169/26646 | 0.019601 | 0.427483 | 0.411665 | arahy.Tifru |
| Biological   GO:004885 adventitio   | 5/1795  | 24/26646  | 0.019986 | 0.427727 | 0.4119   | arahy.Tifru |
| Biological   GO:007037 cellular he  | 5/1795  | 24/26646  | 0.019986 | 0.427727 | 0.4119   | arahy.Tifru |
| Biological   GO:001001 meristem i   | 9/1795  | 61/26646  | 0.020339 | 0.431272 | 0.415313 | arahy.Tifru |
| Biological   GO:003288 regulation   | 9/1795  | 62/26646  | 0.022418 | 0.466696 | 0.449427 | arahy.Tifru |
| Biological   GO:004233 cuticle dev  | 9/1795  | 62/26646  | 0.022418 | 0.466696 | 0.449427 | arahy.Tifru |
| Biological   GO:190165 glycosyl co  | 29/1795 | 291/26646 | 0.02273  | 0.468155 | 0.450832 | arahy.Tifru |
| Biological   GO:000941 response t   | 4/1795  | 17/26646  | 0.024074 | 0.468155 | 0.450832 | arahy.Tifru |
| Biological   GO:003315 regulation   | 4/1795  | 17/26646  | 0.024074 | 0.468155 | 0.450832 | arahy.Tifru |
| Biological   GO:003316 positive re  | 4/1795  | 17/26646  | 0.024074 | 0.468155 | 0.450832 | arahy.Tifru |
| Biological   GO:004217 negative re  | 4/1795  | 17/26646  | 0.024074 | 0.468155 | 0.450832 | arahy.Tifru |
| Biological   GO:004236 positive re  | 4/1795  | 17/26646  | 0.024074 | 0.468155 | 0.450832 | arahy.Tifru |
| Biological   GO:190018 positive re  | 4/1795  | 17/26646  | 0.024074 | 0.468155 | 0.450832 | arahy.Tifru |
| Biological   GO:005125 negative re  | 39/1795 | 417/26646 | 0.024123 | 0.468155 | 0.450832 | arahy.Tifru |
| Biological   GO:000733 single ferti | 6/1795  | 34/26646  | 0.024476 | 0.471014 | 0.453585 | arahy.Tifru |
| Biological   GO:000716 cell surface | 43/1795 | 469/26646 | 0.025095 | 0.476549 | 0.458915 | arahy.Tifru |
| Biological   GO:002176 developme    | 35/1795 | 368/26646 | 0.025217 | 0.476549 | 0.458915 | arahy.Tifru |
| Biological   GO:004243 indole-con   | 3/1795  | 10/26646  | 0.025596 | 0.476549 | 0.458915 | arahy.Tifru |
| Biological   GO:007233 modified a   | 3/1795  | 10/26646  | 0.025596 | 0.476549 | 0.458915 | arahy.Tifru |
| Biological   GO:000962 shade avoi   | 7/1795  | 44/26646  | 0.026599 | 0.486421 | 0.468422 | arahy.Tifru |
| Biological   GO:001021 cellulose r  | 7/1795  | 44/26646  | 0.026599 | 0.486421 | 0.468422 | arahy.Tifru |
| Biological   GO:004677 protein au   | 31/1795 | 320/26646 | 0.026967 | 0.486421 | 0.468422 | arahy.Tifru |
| Biological   GO:000862 carbohydr    | 28/1795 | 283/26646 | 0.026976 | 0.486421 | 0.468422 | arahy.Tifru |
| Biological   GO:200076 regulation   | 5/1795  | 26/26646  | 0.027682 | 0.493358 | 0.475103 | arahy.Tifru |
| Biological   GO:007139 cellular res | 22/1795 | 211/26646 | 0.027792 | 0.493358 | 0.475103 | arahy.Tifru |

a15 and Zhonghua12 peanut

| Count | up | down |
|-------|----|------|
| 10    | 0  | 10   |
| 9     | 0  | 9    |
| 26    | 0  | 26   |
| 51    | 32 | 19   |
| 12    | 5  | 7    |
| 24    | 12 | 12   |
| 32    | 21 | 11   |
| 5     | 1  | 4    |
| 9     | 7  | 2    |
| 27    | 12 | 15   |
| 24    | 17 | 7    |
| 6     | 3  | 3    |
| 37    | 30 | 7    |
| 12    | 5  | 7    |
| 19    | 8  | 11   |
| 9     | 0  | 9    |
| 4     | 3  | 1    |
| 22    | 14 | 8    |
| 18    | 8  | 10   |
| 4     | 1  | 3    |
| 4     | 3  | 1    |
| 4     | 3  | 1    |
| 18    | 8  | 10   |
| 42    | 24 | 18   |
| 4     | 1  | 3    |
| 4     | 0  | 4    |
| 5     | 1  | 4    |
| 36    | 15 | 21   |
| 8     | 8  | 0    |
| 8     | 3  | 5    |
| 7     | 6  | 1    |
| 6     | 4  | 2    |
| 6     | 4  | 2    |
| 4     | 2  | 2    |
| 16    | 8  | 8    |
| 29    | 19 | 10   |
| 8     | 6  | 2    |
| 46    | 29 | 17   |
| 33    | 21 | 12   |
| 33    | 21 | 12   |
| 5     | 3  | 2    |
| 43    | 24 | 19   |
| 16    | 11 | 5    |
| 22    | 8  | 14   |
| 10    | 3  | 7    |
| 9     | 2  | 7    |
| 4     | 0  | 4    |
| 4     | 1  | 3    |

|    |    |    |
|----|----|----|
| 37 | 20 | 17 |
| 3  | 2  | 1  |
| 6  | 4  | 2  |
| 9  | 6  | 3  |
| 20 | 12 | 8  |
| 20 | 12 | 8  |
| 8  | 3  | 5  |
| 9  | 3  | 6  |
| 3  | 1  | 2  |
| 3  | 1  | 2  |
| 3  | 1  | 2  |
| 3  | 1  | 2  |
| 3  | 2  | 1  |
| 17 | 7  | 10 |
| 9  | 2  | 7  |
| 9  | 2  | 7  |
| 7  | 3  | 4  |
| 7  | 3  | 4  |
| 7  | 3  | 4  |
| 4  | 1  | 3  |
| 4  | 3  | 1  |
| 13 | 6  | 7  |
| 5  | 3  | 2  |
| 5  | 3  | 2  |
| 15 | 5  | 10 |
| 15 | 5  | 10 |
| 30 | 9  | 21 |
| 11 | 8  | 3  |
| 9  | 3  | 6  |
| 38 | 24 | 14 |
| 3  | 0  | 3  |
| 3  | 0  | 3  |
| 3  | 0  | 3  |
| 3  | 0  | 3  |
| 3  | 0  | 3  |
| 3  | 2  | 1  |
| 4  | 3  | 1  |
| 8  | 3  | 5  |
| 5  | 0  | 5  |
| 40 | 23 | 17 |
| 8  | 5  | 3  |
| 6  | 1  | 5  |
| 43 | 24 | 19 |
| 13 | 9  | 4  |
| 13 | 9  | 4  |
| 18 | 9  | 9  |
| 5  | 3  | 2  |
| 17 | 6  | 11 |
| 12 | 10 | 2  |
| 43 | 24 | 19 |

|    |    |    |
|----|----|----|
| 3  | 2  | 1  |
| 3  | 3  | 0  |
| 8  | 0  | 8  |
| 42 | 19 | 23 |
| 58 | 32 | 26 |
| 22 | 15 | 7  |
| 13 | 2  | 11 |
| 18 | 12 | 6  |
| 25 | 12 | 13 |
| 21 | 15 | 6  |
| 9  | 4  | 5  |
| 8  | 0  | 8  |
| 5  | 0  | 5  |
| 19 | 14 | 5  |
| 39 | 20 | 19 |
| 31 | 14 | 17 |
| 38 | 10 | 28 |
| 8  | 4  | 4  |
| 8  | 0  | 8  |
| 7  | 4  | 3  |
| 15 | 9  | 6  |
| 46 | 25 | 21 |
| 10 | 2  | 8  |
| 10 | 2  | 8  |
| 10 | 2  | 8  |
| 10 | 2  | 8  |
| 5  | 1  | 4  |
| 5  | 1  | 4  |
| 9  | 0  | 9  |
| 7  | 5  | 2  |
| 25 | 18 | 7  |
| 11 | 4  | 7  |
| 23 | 15 | 8  |
| 46 | 24 | 22 |
| 40 | 7  | 33 |
| 6  | 2  | 4  |
| 23 | 12 | 11 |
| 11 | 6  | 5  |
| 7  | 5  | 2  |
| 15 | 9  | 6  |
| 12 | 5  | 7  |
| 6  | 4  | 2  |
| 45 | 22 | 23 |
| 7  | 6  | 1  |
| 5  | 4  | 1  |
| 5  | 1  | 4  |
| 13 | 8  | 5  |
| 11 | 3  | 8  |
| 37 | 14 | 23 |
| 32 | 8  | 24 |



|    |    |    |
|----|----|----|
| 5  | 1  | 4  |
| 5  | 1  | 4  |
| 29 | 11 | 18 |
| 11 | 7  | 4  |
| 11 | 7  | 4  |
| 17 | 8  | 9  |
| 6  | 6  | 0  |
| 28 | 14 | 14 |
| 46 | 24 | 22 |
| 14 | 10 | 4  |
| 9  | 4  | 5  |
| 9  | 5  | 4  |
| 20 | 15 | 5  |
| 20 | 15 | 5  |
| 15 | 11 | 4  |
| 9  | 2  | 7  |
| 9  | 6  | 3  |
| 9  | 6  | 3  |
| 6  | 6  | 0  |
| 6  | 6  | 0  |
| 5  | 0  | 5  |
| 19 | 8  | 11 |
| 20 | 8  | 12 |
| 12 | 7  | 5  |
| 4  | 1  | 3  |
| 4  | 1  | 3  |
| 4  | 1  | 3  |
| 4  | 1  | 3  |
| 5  | 3  | 2  |
| 9  | 5  | 4  |
| 34 | 16 | 18 |
| 32 | 20 | 12 |
| 32 | 20 | 12 |
| 4  | 1  | 3  |
| 4  | 2  | 2  |
| 31 | 14 | 17 |
| 22 | 7  | 15 |
| 28 | 14 | 14 |
| 9  | 4  | 5  |
| 9  | 4  | 5  |
| 9  | 4  | 5  |
| 5  | 4  | 1  |
| 5  | 0  | 5  |
| 11 | 5  | 6  |
| 11 | 5  | 6  |
| 10 | 7  | 3  |
| 20 | 7  | 13 |
| 4  | 2  | 2  |
| 33 | 17 | 16 |
| 8  | 5  | 3  |

|    |    |    |
|----|----|----|
| 39 | 15 | 24 |
| 39 | 15 | 24 |
| 10 | 7  | 3  |
| 10 | 7  | 3  |
| 7  | 4  | 3  |
| 7  | 5  | 2  |
| 19 | 10 | 9  |
| 5  | 4  | 1  |
| 5  | 3  | 2  |
| 9  | 5  | 4  |
| 9  | 5  | 4  |
| 9  | 7  | 2  |
| 29 | 17 | 12 |
| 4  | 1  | 3  |
| 4  | 4  | 0  |
| 4  | 4  | 0  |
| 4  | 1  | 3  |
| 4  | 4  | 0  |
| 4  | 4  | 0  |
| 39 | 15 | 24 |
| 6  | 2  | 4  |
| 43 | 26 | 17 |
| 35 | 18 | 17 |
| 3  | 0  | 3  |
| 3  | 2  | 1  |
| 7  | 5  | 2  |
| 7  | 3  | 4  |
| 31 | 12 | 19 |
| 28 | 13 | 15 |
| 5  | 4  | 1  |
| 22 | 7  | 15 |
