# Supplementary material for: Transcriptome and Metabolome Analysis Unveil Anthocyanin Metabolism in Pink and Red Testa of Peanut (Arachis hypogaea L.)
Source: Hindawi journal article supplement (doi:10.1155/2021/5883901), 2021-08-06
Supplement: f1 [file 5883901.f1.zip]

Table S5 Differentially expressed transcript

| ID         | Family     | Category | Classification | Name      | Chrom      | hanhua15R | onghua12R | 2FoldChar |
|------------|------------|----------|----------------|-----------|------------|-----------|-----------|-----------|
| ner.gnm1.a | Alfin-like | TF       | Alfin-like     | ahy.TFSP1 | inner.gnm1 | 1093      | 533       | -1.037    |
| ner.gnm1.a | P2/ERF-AI  | TF       | F->AP2/E       | ahy.K6QU  | inner.gnm1 | 92        | 24        | -1.911    |
| ner.gnm1.a | P2/ERF-AI  | TF       | F->AP2/E       | ahy.QEK7  | inner.gnm1 | 167       | 11        | -3.858    |
| ner.gnm1.a | P2/ERF-AI  | TF       | F->AP2/E       | ahy.UU942 | inner.gnm1 | 41        | 89        | 1.141     |
| ner.gnm1.a | P2/ERF-EF  | TF       | F->AP2/E       | ahy.15RN1 | inner.gnm1 | 7         | 44        | 2.634     |
| ner.gnm1.a | P2/ERF-EF  | TF       | F->AP2/E       | ahy.45NR7 | inner.gnm1 | 4196      | 1266      | -1.728    |
| ner.gnm1.a | P2/ERF-EF  | TF       | F->AP2/E       | ahy.47NS3 | inner.gnm1 | 352       | 747       | 1.088     |
| ner.gnm1.a | P2/ERF-EF  | TF       | F->AP2/E       | ahy.4G061 | inner.gnm1 | 934       | 1892      | 1.02      |
| ner.gnm1.a | P2/ERF-EF  | TF       | F->AP2/E       | ahy.5KI8F | inner.gnm1 | 743       | 332       | -1.165    |
| ner.gnm1.a | P2/ERF-EF  | TF       | F->AP2/E       | ahy.73DH2 | inner.gnm1 | 442       | 148       | -1.578    |
| ner.gnm1.a | P2/ERF-EF  | TF       | F->AP2/E       | ahy.87AL6 | inner.gnm1 | 457       | 48        | -3.247    |
| ner.gnm1.a | P2/ERF-EF  | TF       | F->AP2/E       | ahy.9V08H | inner.gnm1 | 48        | 5         | -3.279    |
| ner.gnm1.a | P2/ERF-EF  | TF       | F->AP2/E       | ahy.E9BL1 | inner.gnm1 | 0         | 6         | 5.262     |
| ner.gnm1.a | P2/ERF-EF  | TF       | F->AP2/E       | ahy.ER44L | inner.gnm1 | 6651      | 2732      | -1.283    |
| ner.gnm1.a | P2/ERF-EF  | TF       | F->AP2/E       | ahy.HGAZ1 | inner.gnm1 | 2596      | 6641      | 1.355     |
| ner.gnm1.a | P2/ERF-EF  | TF       | F->AP2/E       | ahy.JE3R1 | inner.gnm1 | 2         | 21        | 3.526     |
| ner.gnm1.a | P2/ERF-EF  | TF       | F->AP2/E       | ahy.KF0N  | inner.gnm1 | 543       | 94        | -2.528    |
| ner.gnm1.a | P2/ERF-EF  | TF       | F->AP2/E       | ahy.L5HMI | inner.gnm1 | 714       | 324       | -1.142    |
| ner.gnm1.a | P2/ERF-EF  | TF       | F->AP2/E       | ahy.L5Q3A | inner.gnm1 | 2         | 30        | 4.064     |
| ner.gnm1.a | P2/ERF-EF  | TF       | F->AP2/E       | ahy.L65DI | inner.gnm1 | 3         | 29        | 3.499     |
| ner.gnm1.a | P2/ERF-EF  | TF       | F->AP2/E       | ahy.LF78J | inner.gnm1 | 20        | 0         | -6.649    |
| ner.gnm1.a | P2/ERF-EF  | TF       | F->AP2/E       | ahy.M71N2 | inner.gnm1 | 89        | 4         | -4.353    |
| ner.gnm1.a | P2/ERF-EF  | TF       | F->AP2/E       | ahy.P2TH  | inner.gnm1 | 6         | 62        | 3.534     |
| ner.gnm1.a | P2/ERF-EF  | TF       | F->AP2/E       | ahy.RN6K1 | inner.gnm1 | 71        | 27        | -1.418    |
| ner.gnm1.a | P2/ERF-EF  | TF       | F->AP2/E       | ahy.ULX5C | inner.gnm1 | 255       | 27        | -3.248    |
| ner.gnm1.a | P2/ERF-EF  | TF       | F->AP2/E       | ahy.VJ8B3 | inner.gnm1 | 183       | 386       | 1.077     |
| ner.gnm1.a | P2/ERF-EF  | TF       | F->AP2/E       | ahy.XJX15 | inner.gnm1 | 0         | 11        | 6.029     |
| ner.gnm1.a | P2/ERF-RA  | TF       | F->AP2/E       | ahy.PDF2M | inner.gnm1 | 770       | 77        | -3.327    |
| ner.gnm1.a | ARID       | TR       | ARID           | ahy.J9QP8 | inner.gnm1 | 84        | 8         | -3.415    |
| ner.gnm1.a | ARID       | TR       | ARID           | ahy.K5DIF | inner.gnm1 | 49        | 13        | -1.929    |
| ner.gnm1.a | AUX/IAA    | TR       | AUX/IAA        | ahy.045PL | inner.gnm1 | 81        | 24        | -1.73     |
| ner.gnm1.a | AUX/IAA    | TR       | AUX/IAA        | ahy.32M24 | inner.gnm1 | 642       | 115       | -2.479    |
| ner.gnm1.a | AUX/IAA    | TR       | AUX/IAA        | ahy.5P5CS | inner.gnm1 | 348       | 1455      | 2.063     |
| ner.gnm1.a | AUX/IAA    | TR       | AUX/IAA        | ahy.5PTI6 | inner.gnm1 | 75        | 11        | -2.727    |
| ner.gnm1.a | AUX/IAA    | TR       | AUX/IAA        | ahy.85LRF | inner.gnm1 | 158       | 76        | -1.058    |
| ner.gnm1.a | AUX/IAA    | TR       | AUX/IAA        | ahy.944Y  | inner.gnm1 | 139       | 298       | 1.105     |
| ner.gnm1.a | AUX/IAA    | TR       | AUX/IAA        | ahy.F330X | inner.gnm1 | 550       | 167       | -1.721    |
| ner.gnm1.a | AUX/IAA    | TR       | AUX/IAA        | ahy.F753K | inner.gnm1 | 43        | 3         | -3.903    |
| ner.gnm1.a | AUX/IAA    | TR       | AUX/IAA        | ahy.N2VZ4 | inner.gnm1 | 117       | 7         | -4.005    |
| ner.gnm1.a | AUX/IAA    | TR       | AUX/IAA        | ahy.P8YRC | inner.gnm1 | 6240      | 2044      | -1.61     |
| ner.gnm1.a | AUX/IAA    | TR       | AUX/IAA        | ahy.P8YRC | inner.gnm1 | 6240      | 2044      | -1.61     |
| ner.gnm1.a | AUX/IAA    | TR       | AUX/IAA        | ahy.QUY01 | inner.gnm1 | 79        | 11        | -2.798    |
| ner.gnm1.a | AUX/IAA    | TR       | AUX/IAA        | ahy.VW0T1 | inner.gnm1 | 213       | 77        | -1.475    |

|            |        |    |           |                     |      |      |        |
|------------|--------|----|-----------|---------------------|------|------|--------|
| ner.gnm1.a | B3     | TF | B3->B3    | ahy.00BQAinner.gnm1 | 7    | 34   | 2.366  |
| ner.gnm1.a | B3     | TF | B3->B3    | ahy.28CQXinner.gnm1 | 38   | 178  | 2.216  |
| ner.gnm1.a | B3     | TF | B3->B3    | ahy.4VG87inner.gnm1 | 104  | 8    | -3.792 |
| ner.gnm1.a | B3     | TF | B3->B3    | ahy.6FQ15inner.gnm1 | 41   | 5    | -3.025 |
| ner.gnm1.a | B3     | TF | B3->B3    | ahy.6PZ11inner.gnm1 | 94   | 257  | 1.454  |
| ner.gnm1.a | B3     | TF | B3->B3    | ahy.7Y7E6inner.gnm1 | 366  | 953  | 1.38   |
| ner.gnm1.a | B3     | TF | B3->B3    | ahy.DRN55inner.gnm1 | 23   | 0    | -6.859 |
| ner.gnm1.a | B3     | TF | B3->B3    | ahy.ES60Ginner.gnm1 | 13   | 1    | -3.177 |
| ner.gnm1.a | B3     | TF | B3->B3    | ahy.HB4Winner.gnm1  | 81   | 175  | 1.103  |
| ner.gnm1.a | B3     | TF | B3->B3    | ahy.I35XGinner.gnm1 | 519  | 1076 | 1.052  |
| ner.gnm1.a | B3     | TF | B3->B3    | ahy.IR6J7inner.gnm1 | 74   | 9    | -3.02  |
| ner.gnm1.a | B3     | TF | B3->B3    | ahy.WFECinner.gnm1  | 119  | 42   | -1.516 |
| ner.gnm1.a | B3     | TF | B3->B3    | ahy.YY0Binner.gnm1  | 167  | 483  | 1.537  |
| ner.gnm1.a | B3     | TF | B3->B3    | ahy.ZJXJ5inner.gnm1 | 212  | 649  | 1.616  |
| ner.gnm1.a | B3-ARF | TF | B3->B3-AR | ahy.22510inner.gnm1 | 327  | 960  | 1.553  |
| ner.gnm1.a | B3-ARF | TF | B3->B3-AR | ahy.2YRLinner.gnm1  | 105  | 34   | -1.628 |
| ner.gnm1.a | B3-ARF | TF | B3->B3-AR | ahy.53DI9inner.gnm1 | 570  | 171  | -1.736 |
| ner.gnm1.a | B3-ARF | TF | B3->B3-AR | ahy.A1HLZinner.gnm1 | 191  | 50   | -1.929 |
| ner.gnm1.a | B3-ARF | TF | B3->B3-AR | ahy.BC5R4inner.gnm1 | 88   | 43   | -1.051 |
| ner.gnm1.a | B3-ARF | TF | B3->B3-AR | ahy.D4KBIinner.gnm1 | 350  | 68   | -2.358 |
| ner.gnm1.a | B3-ARF | TF | B3->B3-AR | ahy.I1MH5inner.gnm1 | 59   | 12   | -2.24  |
| ner.gnm1.a | B3-ARF | TF | B3->B3-AR | ahy.WDRDinner.gnm1  | 1505 | 3142 | 1.062  |
| ner.gnm1.a | B3-ARF | TF | B3->B3-AR | ahy.WQVLinner.gnm1  | 319  | 950  | 1.575  |
| ner.gnm1.a | B3-ARF | TF | B3->B3-AR | ahy.X1U4Minner.gnm1 | 770  | 308  | -1.324 |
| ner.gnm1.a | B3-ARF | TF | B3->B3-AR | ahy.ZE2N5inner.gnm1 | 5    | 25   | 2.378  |
| ner.gnm1.a | bHLH   | TF | bHLH      | ahy.00JV9inner.gnm1 | 826  | 18   | -5.485 |
| ner.gnm1.a | bHLH   | TF | bHLH      | ahy.02IZMinner.gnm1 | 16   | 0    | -6.335 |
| ner.gnm1.a | bHLH   | TF | bHLH      | ahy.0ZB9Yinner.gnm1 | 92   | 13   | -2.83  |
| ner.gnm1.a | bHLH   | TF | bHLH      | ahy.160YLinner.gnm1 | 690  | 260  | -1.407 |
| ner.gnm1.a | bHLH   | TF | bHLH      | ahy.1C4Binner.gnm1  | 177  | 11   | -4.002 |
| ner.gnm1.a | bHLH   | TF | bHLH      | ahy.2031Jinner.gnm1 | 416  | 17   | -4.62  |
| ner.gnm1.a | bHLH   | TF | bHLH      | ahy.24ZZ8inner.gnm1 | 13   | 0    | -6.026 |
| ner.gnm1.a | bHLH   | TF | bHLH      | ahy.26781inner.gnm1 | 1693 | 356  | -2.251 |
| ner.gnm1.a | bHLH   | TF | bHLH      | ahy.2Y1E4inner.gnm1 | 2    | 151  | 6.379  |
| ner.gnm1.a | bHLH   | TF | bHLH      | ahy.3CP6kinner.gnm1 | 46   | 4    | -3.401 |
| ner.gnm1.a | bHLH   | TF | bHLH      | ahy.48I8Dinner.gnm1 | 2    | 18   | 3.349  |
| ner.gnm1.a | bHLH   | TF | bHLH      | ahy.4TH67inner.gnm1 | 12   | 0    | -5.899 |
| ner.gnm1.a | bHLH   | TF | bHLH      | ahy.4XX97inner.gnm1 | 31   | 5    | -2.752 |
| ner.gnm1.a | bHLH   | TF | bHLH      | ahy.5BA4Einner.gnm1 | 334  | 19   | -4.184 |
| ner.gnm1.a | bHLH   | TF | bHLH      | ahy.714UEinner.gnm1 | 36   | 6    | -2.489 |
| ner.gnm1.a | bHLH   | TF | bHLH      | ahy.7G8F9inner.gnm1 | 118  | 39   | -1.588 |
| ner.gnm1.a | bHLH   | TF | bHLH      | ahy.96VLZinner.gnm1 | 905  | 303  | -1.58  |
| ner.gnm1.a | bHLH   | TF | bHLH      | ahy.AUJU4inner.gnm1 | 1782 | 144  | -3.632 |
| ner.gnm1.a | bHLH   | TF | bHLH      | ahy.CWTIinner.gnm1  | 0    | 7    | 5.388  |
| ner.gnm1.a | bHLH   | TF | bHLH      | ahy.E5BLPinner.gnm1 | 1    | 97   | 6.333  |

|            |      |    |      |                     |      |      |        |
|------------|------|----|------|---------------------|------|------|--------|
| ner.gnm1.a | bHLH | TF | bHLH | ahy.EG7Blinner.gnm1 | 2701 | 1079 | -1.324 |
| ner.gnm1.a | bHLH | TF | bHLH | ahy.FH0TLinner.gnm1 | 182  | 1    | -7.957 |
| ner.gnm1.a | bHLH | TF | bHLH | ahy.G6BHLinner.gnm1 | 19   | 2    | -3.64  |
| ner.gnm1.a | bHLH | TF | bHLH | ahy.GL41Vinner.gnm1 | 1872 | 751  | -1.318 |
| ner.gnm1.a | bHLH | TF | bHLH | ahy.H39FEinner.gnm1 | 119  | 32   | -1.876 |
| ner.gnm1.a | bHLH | TF | bHLH | ahy.HM1Vinner.gnm1  | 497  | 49   | -3.349 |
| ner.gnm1.a | bHLH | TF | bHLH | ahy.HR6Finner.gnm1  | 106  | 0    | -9.037 |
| ner.gnm1.a | bHLH | TF | bHLH | ahy.HVT1inner.gnm1  | 11   | 318  | 4.833  |
| ner.gnm1.a | bHLH | TF | bHLH | ahy.I9XMinner.gnm1  | 380  | 3    | -6.938 |
| ner.gnm1.a | bHLH | TF | bHLH | ahy.J0D1Jinner.gnm1 | 662  | 253  | -1.389 |
| ner.gnm1.a | bHLH | TF | bHLH | ahy.JV9T2inner.gnm1 | 22   | 1    | -4.872 |
| ner.gnm1.a | bHLH | TF | bHLH | ahy.K3IFFinner.gnm1 | 11   | 177  | 4.023  |
| ner.gnm1.a | bHLH | TF | bHLH | ahy.K68BCinner.gnm1 | 414  | 134  | -1.628 |
| ner.gnm1.a | bHLH | TF | bHLH | ahy.L9MGinner.gnm1  | 60   | 24   | -1.332 |
| ner.gnm1.a | bHLH | TF | bHLH | ahy.MB81inner.gnm1  | 131  | 45   | -1.547 |
| ner.gnm1.a | bHLH | TF | bHLH | ahy.MW3Sinner.gnm1  | 97   | 19   | -2.372 |
| ner.gnm1.a | bHLH | TF | bHLH | ahy.MX4Linner.gnm1  | 142  | 8    | -4.198 |
| ner.gnm1.a | bHLH | TF | bHLH | ahy.MXM7inner.gnm1  | 268  | 34   | -2.976 |
| ner.gnm1.a | bHLH | TF | bHLH | ahy.N7IIZinner.gnm1 | 31   | 445  | 3.854  |
| ner.gnm1.a | bHLH | TF | bHLH | ahy.NX4Winner.gnm1  | 312  | 798  | 1.353  |
| ner.gnm1.a | bHLH | TF | bHLH | ahy.P97QTinner.gnm1 | 40   | 189  | 2.237  |
| ner.gnm1.a | bHLH | TF | bHLH | ahy.PC0Ginner.gnm1  | 156  | 635  | 2.03   |
| ner.gnm1.a | bHLH | TF | bHLH | ahy.PYSXinner.gnm1  | 1    | 15   | 4.582  |
| ner.gnm1.a | bHLH | TF | bHLH | ahy.QSZJ9inner.gnm1 | 8    | 0    | -5.267 |
| ner.gnm1.a | bHLH | TF | bHLH | ahy.RSI8Tinner.gnm1 | 340  | 44   | -2.963 |
| ner.gnm1.a | bHLH | TF | bHLH | ahy.RSVCinner.gnm1  | 30   | 3    | -3.361 |
| ner.gnm1.a | bHLH | TF | bHLH | ahy.SH99Linner.gnm1 | 21   | 81   | 1.938  |
| ner.gnm1.a | bHLH | TF | bHLH | ahy.SQH7Linner.gnm1 | 74   | 11   | -2.751 |
| ner.gnm1.a | bHLH | TF | bHLH | ahy.SVE7Cinner.gnm1 | 7868 | 1464 | -2.426 |
| ner.gnm1.a | bHLH | TF | bHLH | ahy.T023Hinner.gnm1 | 10   | 265  | 4.72   |
| ner.gnm1.a | bHLH | TF | bHLH | ahy.TWQ0inner.gnm1  | 230  | 51   | -2.176 |
| ner.gnm1.a | bHLH | TF | bHLH | ahy.U584Ninner.gnm1 | 19   | 1    | -4.698 |
| ner.gnm1.a | bHLH | TF | bHLH | ahy.VFS8Minner.gnm1 | 146  | 16   | -3.202 |
| ner.gnm1.a | bHLH | TF | bHLH | ahy.W9Z2Linner.gnm1 | 221  | 42   | -2.402 |
| ner.gnm1.a | bHLH | TF | bHLH | ahy.X3LKCinner.gnm1 | 57   | 20   | -1.503 |
| ner.gnm1.a | bHLH | TF | bHLH | ahy.XN5Cinner.gnm1  | 8971 | 1335 | -2.748 |
| ner.gnm1.a | bHLH | TF | bHLH | ahy.Y3C6Linner.gnm1 | 1    | 12   | 3.734  |
| ner.gnm1.a | bHLH | TF | bHLH | ahy.Z8D0Ninner.gnm1 | 10   | 0    | -5.63  |
| ner.gnm1.a | bHLH | TF | bHLH | ahy.ZXK4Linner.gnm1 | 0    | 15   | 5.55   |
| ner.gnm1.a | bZIP | TF | bZIP | ahy.0BLGinner.gnm1  | 148  | 1    | -7.647 |
| ner.gnm1.a | bZIP | TF | bZIP | ahy.1A1ACinner.gnm1 | 199  | 94   | -1.085 |
| ner.gnm1.a | bZIP | TF | bZIP | ahy.1B2Z8inner.gnm1 | 779  | 2402 | 1.624  |
| ner.gnm1.a | bZIP | TF | bZIP | ahy.1D6Rinner.gnm1  | 31   | 4    | -2.863 |
| ner.gnm1.a | bZIP | TF | bZIP | ahy.53DGLinner.gnm1 | 18   | 270  | 3.953  |
| ner.gnm1.a | bZIP | TF | bZIP | ahy.661MCinner.gnm1 | 8    | 48   | 2.615  |

|            |             |    |          |                     |      |      |        |
|------------|-------------|----|----------|---------------------|------|------|--------|
| ner.gnm1.a | bZIP        | TF | bZIP     | ahy.6K442inner.gnm1 | 554  | 1843 | 1.735  |
| er.gnm1.a  | bZIP        | TF | bZIP     | ahy.71DGVinner.gnm1 | 94   | 1    | -6.019 |
| er.gnm1.a  | bZIP        | TF | bZIP     | ahy.8U3XLinner.gnm1 | 23   | 0    | -6.833 |
| ner.gnm1.a | bZIP        | TF | bZIP     | ahy.980X4inner.gnm1 | 140  | 385  | 1.458  |
| er.gnm1.a  | bZIP        | TF | bZIP     | ahy.9KRVinner.gnm1  | 132  | 330  | 1.323  |
| ner.gnm1.a | bZIP        | TF | bZIP     | ahy.9PR62inner.gnm1 | 1227 | 240  | -2.354 |
| er.gnm1.a  | bZIP        | TF | bZIP     | ahy.A7USinner.gnm1  | 28   | 76   | 1.458  |
| ner.gnm1.a | bZIP        | TF | bZIP     | ahy.AA11inner.gnm1  | 20   | 75   | 1.884  |
| er.gnm1.a  | bZIP        | TF | bZIP     | ahy.AFV1inner.gnm1  | 182  | 550  | 1.597  |
| er.gnm1.a  | bZIP        | TF | bZIP     | ahy.B9A4Xinner.gnm1 | 24   | 62   | 1.362  |
| er.gnm1.a  | bZIP        | TF | bZIP     | ahy.F95VFinner.gnm1 | 173  | 5    | -5.311 |
| er.gnm1.a  | bZIP        | TF | bZIP     | ahy.H6GQinner.gnm1  | 4    | 30   | 3.03   |
| ner.gnm1.a | bZIP        | TF | bZIP     | ahy.K23Zinner.gnm1  | 965  | 1948 | 1.013  |
| er.gnm1.a  | bZIP        | TF | bZIP     | ahy.KZ9VVinner.gnm1 | 695  | 1409 | 1.019  |
| er.gnm1.a  | bZIP        | TF | bZIP     | ahy.MHQ5inner.gnm1  | 111  | 53   | -1.07  |
| ner.gnm1.a | bZIP        | TF | bZIP     | ahy.R46Qinner.gnm1  | 36   | 7    | -2.431 |
| ner.gnm1.a | bZIP        | TF | bZIP     | ahy.RIV6Zinner.gnm1 | 101  | 729  | 2.855  |
| er.gnm1.a  | bZIP        | TF | bZIP     | ahy.T95EUinner.gnm1 | 2274 | 6150 | 1.435  |
| er.gnm1.a  | bZIP        | TF | bZIP     | ahy.V67Uinner.gnm1  | 46   | 0    | -7.845 |
| ner.gnm1.a | bZIP        | TF | bZIP     | ahy.VA7Iinner.gnm1  | 1564 | 4851 | 1.634  |
| ner.gnm1.a | bZIP        | TF | bZIP     | ahy.W16Iinner.gnm1  | 2074 | 428  | -2.278 |
| er.gnm1.a  | bZIP        | TF | bZIP     | ahy.ZES6Cinner.gnm1 | 415  | 51   | -3.021 |
| er.gnm1.a  | C2C2-CO-lil | TF | ->C2C2-C | ahy.8MV2inner.gnm1  | 333  | 80   | -2.054 |
| ner.gnm1.a | C2C2-CO-lil | TF | ->C2C2-C | ahy.AY8I6inner.gnm1 | 363  | 39   | -3.216 |
| er.gnm1.a  | C2C2-CO-lil | TF | ->C2C2-C | ahy.B9QMIinner.gnm1 | 634  | 187  | -1.763 |
| er.gnm1.a  | C2C2-CO-lil | TF | ->C2C2-C | ahy.WVH2inner.gnm1  | 163  | 12   | -3.797 |
| er.gnm1.a  | C2C2-CO-lil | TF | ->C2C2-C | ahy.ZS9VVinner.gnm1 | 542  | 209  | -1.375 |
| er.gnm1.a  | C2C2-CO-lil | TF | ->C2C2-C | ahy.ZUL4inner.gnm1  | 224  | 1    | -7.26  |
| er.gnm1.a  | C2C2-Dof    | TF | ->C2C2-C | ahy.1W91inner.gnm1  | 303  | 43   | -2.804 |
| er.gnm1.a  | C2C2-Dof    | TF | ->C2C2-C | ahy.2GK99inner.gnm1 | 24   | 0    | -5.909 |
| ner.gnm1.a | C2C2-Dof    | TF | ->C2C2-C | ahy.34G27inner.gnm1 | 164  | 13   | -3.719 |
| er.gnm1.a  | C2C2-Dof    | TF | ->C2C2-C | ahy.4PTWinner.gnm1  | 33   | 1    | -5.467 |
| er.gnm1.a  | C2C2-Dof    | TF | ->C2C2-C | ahy.5HWLinner.gnm1  | 180  | 371  | 1.046  |
| er.gnm1.a  | C2C2-Dof    | TF | ->C2C2-C | ahy.8CQXinner.gnm1  | 113  | 11   | -3.341 |
| er.gnm1.a  | C2C2-Dof    | TF | ->C2C2-C | ahy.90U3Linner.gnm1 | 9    | 0    | -5.514 |
| er.gnm1.a  | C2C2-Dof    | TF | ->C2C2-C | ahy.915EMinner.gnm1 | 44   | 91   | 1.054  |
| er.gnm1.a  | C2C2-Dof    | TF | ->C2C2-C | ahy.9D5Cinner.gnm1  | 30   | 3    | -3.384 |
| er.gnm1.a  | C2C2-Dof    | TF | ->C2C2-C | ahy.9H8X3inner.gnm1 | 82   | 34   | -1.263 |
| er.gnm1.a  | C2C2-Dof    | TF | ->C2C2-C | ahy.E40HCinner.gnm1 | 66   | 16   | -2.062 |
| ner.gnm1.a | C2C2-Dof    | TF | ->C2C2-C | ahy.FCS6Cinner.gnm1 | 17   | 72   | 2.134  |
| er.gnm1.a  | C2C2-Dof    | TF | ->C2C2-C | ahy.K8YLAinner.gnm1 | 391  | 13   | -4.9   |
| er.gnm1.a  | C2C2-Dof    | TF | ->C2C2-C | ahy.ME2Jinner.gnm1  | 57   | 5    | -3.443 |
| er.gnm1.a  | C2C2-Dof    | TF | ->C2C2-C | ahy.MNZOinner.gnm1  | 128  | 356  | 1.472  |
| er.gnm1.a  | C2C2-Dof    | TF | ->C2C2-C | ahy.NQ5Kinner.gnm1  | 23   | 90   | 1.964  |
| ner.gnm1.a | C2C2-Dof    | TF | ->C2C2-C | ahy.TL4KIinner.gnm1 | 64   | 217  | 1.76   |

|            |           |    |                     |            |      |      |        |
|------------|-----------|----|---------------------|------------|------|------|--------|
| er.gnm1.ar | C2C2-Dof  | TF | C2->C2C2-ahy.V6RQC  | inner.gnm1 | 309  | 117  | -1.399 |
| er.gnm1.ar | C2C2-Dof  | TF | C2->C2C2-ahy.VNR2   | inner.gnm1 | 56   | 20   | -1.468 |
| er.gnm1.ar | C2C2-Dof  | TF | C2->C2C2-ahy.Y4ER   | inner.gnm1 | 154  | 60   | -1.356 |
| er.gnm1.a  | C2C2-Dof  | TF | C2->C2C2-ahy.ZL8R   | inner.gnm1 | 745  | 1660 | 1.155  |
| er.gnm1.a  | C2C2-GAT  | TF | C2->C2C2-Gahy.3J6WS | inner.gnm1 | 7    | 0    | -5.128 |
| er.gnm1.a  | C2C2-GAT  | TF | C2->C2C2-Gahy.3S8P0 | inner.gnm1 | 1001 | 3065 | 1.615  |
| er.gnm1.a  | C2C2-GAT  | TF | C2->C2C2-Gahy.4Y7J5 | inner.gnm1 | 104  | 20   | -2.343 |
| er.gnm1.ar | C2C2-GAT  | TF | C2->C2C2-Gahy.GUPV  | inner.gnm1 | 98   | 15   | -2.736 |
| er.gnm1.ar | C2C2-GAT  | TF | C2->C2C2-Gahy.HHX0  | inner.gnm1 | 116  | 9    | -3.6   |
| er.gnm1.a  | C2C2-GAT  | TF | C2->C2C2-Gahy.I6JZD | inner.gnm1 | 1250 | 3229 | 1.369  |
| er.gnm1.a  | C2C2-GAT  | TF | C2->C2C2-Gahy.KA6Y  | inner.gnm1 | 129  | 53   | -1.282 |
| er.gnm1.ar | C2C2-GAT  | TF | C2->C2C2-Gahy.NCU4  | inner.gnm1 | 25   | 3    | -3.124 |
| er.gnm1.a  | C2C2-YABE | TF | C2->C2C2-Yahy.3KF6  | inner.gnm1 | 0    | 9    | 4.764  |
| er.gnm1.a  | C2H2      | TF | C2H2 ahhy.0S1LA     | inner.gnm1 | 282  | 116  | -1.28  |
| er.gnm1.a  | C2H2      | TF | C2H2 ahhy.20D4      | inner.gnm1 | 41   | 146  | 1.831  |
| er.gnm1.a  | C2H2      | TF | C2H2 ahhy.2IZ1H     | inner.gnm1 | 12   | 73   | 2.578  |
| er.gnm1.a  | C2H2      | TF | C2H2 ahhy.30LJX     | inner.gnm1 | 126  | 62   | -1.032 |
| er.gnm1.a  | C2H2      | TF | C2H2 ahhy.32BR6     | inner.gnm1 | 234  | 2    | -6.731 |
| er.gnm1.a  | C2H2      | TF | C2H2 ahhy.369ZB     | inner.gnm1 | 110  | 37   | -1.56  |
| er.gnm1.a  | C2H2      | TF | C2H2 ahhy.3E1TE     | inner.gnm1 | 11   | 98   | 3.221  |
| er.gnm1.ar | C2H2      | TF | C2H2 ahhy.53HSK     | inner.gnm1 | 46   | 176  | 1.95   |
| er.gnm1.a  | C2H2      | TF | C2H2 ahhy.55B6K     | inner.gnm1 | 74   | 737  | 3.321  |
| er.gnm1.a  | C2H2      | TF | C2H2 ahhy.5FCQ      | inner.gnm1 | 229  | 14   | -4.04  |
| er.gnm1.ar | C2H2      | TF | C2H2 ahhy.60VM      | inner.gnm1 | 310  | 57   | -2.446 |
| er.gnm1.a  | C2H2      | TF | C2H2 ahhy.6835Z     | inner.gnm1 | 528  | 222  | -1.25  |
| er.gnm1.a  | C2H2      | TF | C2H2 ahhy.860KU     | inner.gnm1 | 7    | 0    | -5.085 |
| er.gnm1.ar | C2H2      | TF | C2H2 ahhy.8W2D      | inner.gnm1 | 1359 | 419  | -1.699 |
| er.gnm1.a  | C2H2      | TF | C2H2 ahhy.908HV     | inner.gnm1 | 150  | 22   | -2.77  |
| er.gnm1.ar | C2H2      | TF | C2H2 ahhy.A8Q4I     | inner.gnm1 | 292  | 36   | -3.016 |
| er.gnm1.a  | C2H2      | TF | C2H2 ahhy.B4LZ      | inner.gnm1 | 229  | 12   | -4.199 |
| er.gnm1.ar | C2H2      | TF | C2H2 ahhy.BAL5      | inner.gnm1 | 468  | 1116 | 1.253  |
| er.gnm1.a  | C2H2      | TF | C2H2 ahhy.CA07      | inner.gnm1 | 63   | 362  | 2.538  |
| er.gnm1.a  | C2H2      | TF | C2H2 ahhy.DX8F      | inner.gnm1 | 119  | 378  | 1.665  |
| er.gnm1.ar | C2H2      | TF | C2H2 ahhy.GRPH      | inner.gnm1 | 4    | 24   | 2.746  |
| er.gnm1.ar | C2H2      | TF | C2H2 ahhy.H7D8F     | inner.gnm1 | 404  | 97   | -2.065 |
| er.gnm1.ar | C2H2      | TF | C2H2 ahhy.H8QN      | inner.gnm1 | 57   | 134  | 1.23   |
| er.gnm1.a  | C2H2      | TF | C2H2 ahhy.IVEQ      | inner.gnm1 | 363  | 982  | 1.437  |
| er.gnm1.a  | C2H2      | TF | C2H2 ahhy.LUSX      | inner.gnm1 | 142  | 305  | 1.105  |
| er.gnm1.ar | C2H2      | TF | C2H2 ahhy.LXQM      | inner.gnm1 | 359  | 127  | -1.505 |
| er.gnm1.an | C2H2      | TF | C2H2 ahhy.MH5U      | inner.gnm1 | 185  | 403  | 1.125  |
| er.gnm1.ar | C2H2      | TF | C2H2 ahhy.N4UY      | inner.gnm1 | 103  | 11   | -3.236 |
| er.gnm1.a  | C2H2      | TF | C2H2 ahhy.N8H2      | inner.gnm1 | 67   | 152  | 1.187  |
| er.gnm1.ar | C2H2      | TF | C2H2 ahhy.QY5N      | inner.gnm1 | 133  | 33   | -2.033 |
| er.gnm1.a  | C2H2      | TF | C2H2 ahhy.T9EC      | inner.gnm1 | 18   | 102  | 2.466  |
| er.gnm1.a  | C2H2      | TF | C2H2 ahhy.TFH4      | inner.gnm1 | 17   | 1    | -3.954 |

|            |           |    |                              |                      |      |        |        |
|------------|-----------|----|------------------------------|----------------------|------|--------|--------|
| ner.gnm1.a | C2H2      | TF | C2H2                         | ahy.U3PP5inner.gnm1  | 163  | 538    | 1.727  |
| er.gnm1.a  | C2H2      | TF | C2H2                         | ahy.UTHZinner.gnm1   | 29   | 353    | 3.635  |
| er.gnm1.an | C2H2      | TF | C2H2                         | hy.WX8Ainner.gnm1    | 24   | 3      | -2.781 |
| er.gnm1.a  | C2H2      | TF | C2H2                         | ahy.YDP8inner.gnm1   | 377  | 84     | -2.176 |
| ner.gnm1.a | C2H2      | TF | C2H2                         | ahy.YVFIinner.gnm1   | 4    | 97     | 4.444  |
| er.gnm1.a  | C3H       | TF | C3H                          | ahy.S57KMner.gnm1.   | 94   | 19     | -2.302 |
| er.gnm1.ar | C3H       | TF | C3H                          | ahy.W4V2inner.gnm1   | 19   | 136    | 2.831  |
| er.gnm1.ar | C3H       | TF | C3H                          | thy.WU4Xinner.gnm1   | 7    | 75     | 3.436  |
| er.gnm1.an | C3H       | TF | C3H                          | hy.YQ2HFinner.gnm1   | 170  | 419    | 1.3    |
| er.gnm1.ar | CPP       | TF | CPP                          | ahy.VMK2inner.gnm1   | 157  | 30     | -2.376 |
| ner.gnm1.a | DBB       | TF | DBB                          | ahy.3FT6Zinner.gnm1  | 1083 | 458    | -1.242 |
| ner.gnm1.a | DBB       | TF | DBB                          | ahy.PY0P2inner.gnm1  | 409  | 116    | -1.824 |
| er.gnm1.ar | DBB       | TF | DBB                          | ahy.R1XHinner.gnm1   | 587  | 193    | -1.609 |
| er.gnm1.an | DBP       | TF | DBP                          | hy.WG32Vinner.gnm1   | 182  | 4      | -5.405 |
| er.gnm1.a  | E2F-DP    | TF | E2F-DP                       | ahy.2L64Qinner.gnm1  | 14   | 1      | -3.672 |
| ner.gnm1.a | E2F-DP    | TF | E2F-DP                       | ahy.C6R1inner.gnm1   | 19   | 0      | -6.54  |
| ner.gnm1.a | E2F-DP    | TF | E2F-DP                       | ahy.Q67Z2inner.gnm1  | 471  | 209    | -1.178 |
| ner.gnm1.a | FAR1      | TF | FAR1                         | ahy.8SNEinner.gnm1   | 10   | 31     | 1.649  |
| er.gnm1.ar | ARP-ARR   | TF | '->GARP-Ahy.Q3RAinner.gnm1   | 36                   | 6    | -2.635 |        |
| er.gnm1.ar | ARP-ARR   | TF | '->GARP-Ahy.UG2Hinner.gnm1   | 66                   | 25   | -1.371 |        |
| er.gnm1.a  | ARP-G2-li | TF | '->GARP-Cahy.1J8Q1inner.gnm1 | 39                   | 11   | -1.798 |        |
| er.gnm1.a  | ARP-G2-li | TF | '->GARP-Cahy.1Z7Ginner.gnm1  | 960                  | 254  | -1.921 |        |
| ner.gnm1.a | ARP-G2-li | TF | '->GARP-Cahy.25X1inner.gnm1  | 207                  | 89   | -1.219 |        |
| er.gnm1.ar | ARP-G2-li | TF | '->GARP-Cahy.A9PKinner.gnm1  | 393                  | 1    | -8.09  |        |
| er.gnm1.a  | ARP-G2-li | TF | '->GARP-Cahy.DD0Tinner.gnm1  | 588                  | 257  | -1.191 |        |
| er.gnm1.ar | ARP-G2-li | TF | '->GARP-Cahy.G8T7Rinner.gnm1 | 281                  | 749  | 1.418  |        |
| er.gnm1.an | ARP-G2-li | TF | '->GARP-Chy.GRY8Cinner.gnm1  | 1489                 | 490  | -1.605 |        |
| ner.gnm1.a | ARP-G2-li | TF | '->GARP-Cahy.J44A6inner.gnm1 | 156                  | 48   | -1.688 |        |
| ner.gnm1.a | ARP-G2-li | TF | '->GARP-Cahy.KD5Binner.gnm1  | 116                  | 36   | -1.715 |        |
| er.gnm1.ar | ARP-G2-li | TF | '->GARP-Cahy.MQY6inner.gnm1  | 1439                 | 489  | -1.558 |        |
| er.gnm1.ar | ARP-G2-li | TF | '->GARP-Cahy.N0RGIinner.gnm1 | 48                   | 2    | -4.433 |        |
| er.gnm1.ar | ARP-G2-li | TF | '->GARP-Cahy.N8Q6Vinner.gnm1 | 535                  | 211  | -1.342 |        |
| er.gnm1.a  | ARP-G2-li | TF | '->GARP-Cahy.QX8Cinner.gnm1  | 312                  | 88   | -1.827 |        |
| ner.gnm1.a | ARP-G2-li | TF | '->GARP-Cahy.SI8X9inner.gnm1 | 25                   | 0    | -6.937 |        |
| ner.gnm1.a | ARP-G2-li | TF | '->GARP-Cahy.SPR8inner.gnm1  | 85                   | 4    | -4.569 |        |
| er.gnm1.a  | ARP-G2-li | TF | '->GARP-Cahy.UB10Vinner.gnm1 | 532                  | 197  | -1.435 |        |
| er.gnm1.ar | ARP-G2-li | TF | '->GARP-Cahy.V5WQinner.gnm1  | 15                   | 89   | 2.6    |        |
| ner.gnm1.a | ARP-G2-li | TF | '->GARP-Cahy.VJ5Qinner.gnm1  | 331                  | 105  | -1.653 |        |
| er.gnm1.ar | ARP-G2-li | TF | '->GARP-Cahy.VRF1Cinner.gnm1 | 513                  | 1181 | 1.204  |        |
| ner.gnm1.a | ARP-G2-li | TF | '->GARP-Cahy.Y2U0inner.gnm1  | 1004                 | 402  | -1.322 |        |
| ner.gnm1.a | ARP-G2-li | TF | '->GARP-Cahy.YIX46inner.gnm1 | 791                  | 158  | -2.319 |        |
| er.gnm1.ar | ARP-G2-li | TF | '->GARP-Cahy.ZMGMinner.gnm1  | 1211                 | 266  | -2.188 |        |
| ner.gnm1.a | GNAT      | TR | GNAT                         | rahy.15S67inner.gnm1 | 1    | 62     | 5.768  |
| er.gnm1.a  | GNAT      | TR | GNAT                         | ahy.2AD1inner.gnm1   | 3    | 23     | 2.805  |
| ner.gnm1.a | GNAT      | TR | GNAT                         | ahy.43GZ2inner.gnm1  | 2    | 19     | 3.389  |

|             |           |    |          |                      |      |      |        |
|-------------|-----------|----|----------|----------------------|------|------|--------|
| ier.gnm1.a  | GNAT      | TR | GNAT     | ahy.5V2B3inner.gnm1  | 73   | 12   | -2.627 |
| ier.gnm1.a1 | GNAT      | TR | GNAT     | ahy.FQMP1inner.gnm1  | 38   | 8    | -2.232 |
| ier.gnm1.a1 | GNAT      | TR | GNAT     | ahy.GCG11inner.gnm1  | 43   | 154  | 1.865  |
| ier.gnm1.a1 | GNAT      | TR | GNAT     | ahy.ML1P1inner.gnm1  | 26   | 67   | 1.388  |
| ier.gnm1.a1 | GNAT      | TR | GNAT     | ahy.NU1P1inner.gnm1  | 158  | 57   | -1.482 |
| ier.gnm1.a1 | GNAT      | TR | GNAT     | ahy.Q2LG1inner.gnm1  | 204  | 61   | -1.728 |
| er.gnm1.a1  | GNAT      | TR | GNAT     | ahy.RYXG1inner.gnm1  | 95   | 612  | 2.69   |
| ier.gnm1.a1 | GNAT      | TR | GNAT     | ahy.V4AD1inner.gnm1  | 1    | 139  | 6.879  |
| ier.gnm1.a  | GNAT      | TR | GNAT     | ahy.XZ9N1inner.gnm1  | 19   | 141  | 2.915  |
| er.gnm1.a1  | GRAS      | TF | GRAS     | ahy.1BB2M1inner.gnm1 | 3503 | 1398 | -1.325 |
| ier.gnm1.a1 | GRAS      | TF | GRAS     | ahy.8X00Q1inner.gnm1 | 296  | 95   | -1.634 |
| er.gnm1.a1  | GRAS      | TF | GRAS     | ahy.M96W1inner.gnm1  | 1116 | 521  | -1.098 |
| ier.gnm1.a1 | GRAS      | TF | GRAS     | ahy.P9UX1inner.gnm1  | 263  | 90   | -1.543 |
| ner.gnm1.a  | GRAS      | TF | GRAS     | ahy.YX6J1inner.gnm1  | 3    | 33   | 3.678  |
| ner.gnm1.a  | GRF       | TF | GRF      | ahy.727QF1inner.gnm1 | 81   | 34   | -1.247 |
| ier.gnm1.a1 | GRF       | TF | GRF      | ahy.7VQ11inner.gnm1  | 117  | 11   | -3.376 |
| ier.gnm1.a1 | GRF       | TF | GRF      | ahy.AF8A1inner.gnm1  | 34   | 7    | -2.381 |
| ner.gnm1.a  | GRF       | TF | GRF      | ahy.E8HE1inner.gnm1  | 84   | 14   | -2.602 |
| ier.gnm1.a1 | GRF       | TF | GRF      | ahy.EY9JV1inner.gnm1 | 61   | 10   | -2.591 |
| ier.gnm1.a1 | GRF       | TF | GRF      | ahy.G4PR1inner.gnm1  | 139  | 54   | -1.374 |
| ner.gnm1.a  | GRF       | TF | GRF      | ahy.IE1EN1inner.gnm1 | 124  | 10   | -3.617 |
| er.gnm1.a1  | GRF       | TF | GRF      | ahy.KV1X1inner.gnm1  | 125  | 24   | -2.405 |
| er.gnm1.a1  | GRF       | TF | GRF      | ahy.MSLW1inner.gnm1  | 112  | 38   | -1.545 |
| ier.gnm1.a1 | GRF       | TF | GRF      | ahy.N7G5L1inner.gnm1 | 49   | 9    | -2.487 |
| ier.gnm1.a1 | HB-BELL   | TF | 3->HB-BE | ahy.2C6XE1inner.gnm1 | 133  | 404  | 1.605  |
| er.gnm1.a1  | HB-BELL   | TF | 3->HB-BE | ahy.4HW51inner.gnm1  | 33   | 1    | -4.951 |
| ier.gnm1.a1 | HB-BELL   | TF | 3->HB-BE | ahy.69CRN1inner.gnm1 | 115  | 236  | 1.04   |
| ner.gnm1.a1 | IB-HD-ZII | TF | ->HB-HD- | ahy.1QJ781inner.gnm1 | 70   | 2    | -5.25  |
| ner.gnm1.a1 | IB-HD-ZII | TF | ->HB-HD- | ahy.29D941inner.gnm1 | 275  | 101  | -1.438 |
| ier.gnm1.a1 | IB-HD-ZII | TF | ->HB-HD- | ahy.43GL1inner.gnm1  | 847  | 212  | -1.999 |
| ier.gnm1.a1 | IB-HD-ZII | TF | ->HB-HD- | ahy.5G8LZ1inner.gnm1 | 866  | 1999 | 1.207  |
| ier.gnm1.a1 | IB-HD-ZII | TF | ->HB-HD- | ahy.69QR1inner.gnm1  | 252  | 67   | -1.917 |
| ier.gnm1.a1 | IB-HD-ZII | TF | ->HB-HD- | ahy.71NB1inner.gnm1  | 85   | 28   | -1.597 |
| ner.gnm1.a1 | IB-HD-ZII | TF | ->HB-HD- | ahy.899DF1inner.gnm1 | 45   | 4    | -3.328 |
| ier.gnm1.a1 | IB-HD-ZII | TF | ->HB-HD- | ahy.97AX41inner.gnm1 | 513  | 222  | -1.212 |
| ier.gnm1.a1 | IB-HD-ZII | TF | ->HB-HD- | ahy.BYTU1inner.gnm1  | 265  | 129  | -1.044 |
| ier.gnm1.a1 | IB-HD-ZII | TF | ->HB-HD- | ahy.EBSD1inner.gnm1  | 567  | 1480 | 1.384  |
| ner.gnm1.a1 | IB-HD-ZII | TF | ->HB-HD- | ahy.FYS41inner.gnm1  | 0    | 10   | 5.865  |
| ner.gnm1.a1 | IB-HD-ZII | TF | ->HB-HD- | ahy.J7P0L1inner.gnm1 | 20   | 113  | 2.531  |
| ner.gnm1.a1 | IB-HD-ZII | TF | ->HB-HD- | ahy.JCYU1inner.gnm1  | 1091 | 180  | -2.601 |
| ier.gnm1.a1 | IB-HD-ZII | TF | ->HB-HD- | ahy.NX7S1inner.gnm1  | 406  | 1625 | 2.003  |
| ier.gnm1.a1 | IB-HD-ZII | TF | ->HB-HD- | ahy.QL12S1inner.gnm1 | 600  | 1227 | 1.033  |
| er.gnm1.a1  | IB-HD-ZII | TF | ->HB-HD- | ahy.RWXL1inner.gnm1  | 100  | 43   | -1.213 |
| ier.gnm1.a1 | IB-HD-ZII | TF | ->HB-HD- | ahy.VK2H1inner.gnm1  | 608  | 278  | -1.132 |
| er.gnm1.a1  | IB-HD-ZII | TF | ->HB-HD- | ahy.VQN41inner.gnm1  | 38   | 3    | -3.689 |

|           |           |    |                   |            |            |      |        |        |
|-----------|-----------|----|-------------------|------------|------------|------|--------|--------|
| er.gnm1.a | IB-HD-ZII | TF | ->HB-HD-ahy.VX60J | inner.gnm1 | 436        | 114  | -1.93  |        |
| er.gnm1.a | IB-HD-ZII | TF | ->HB-HD-ahy.W0PH  | inner.gnm1 | 230        | 715  | 1.639  |        |
| er.gnm1.a | IB-HD-ZII | TF | ->HB-HD-ahy.YS1R  | inner.gnm1 | 1300       | 82   | -3.998 |        |
| er.gnm1.a | IB-HD-ZII | TF | ->HB-HD-ahy.ZBAY  | inner.gnm1 | 225        | 452  | 1.01   |        |
| er.gnm1.a | HB-KNOX   | TF | ->HB-KNahy.4NTH   | inner.gnm1 | 2286       | 4581 | 1.003  |        |
| er.gnm1.a | HB-KNOX   | TF | ->HB-KNahy.EUX0   | inner.gnm1 | 0          | 9    | 5.815  |        |
| er.gnm1.a | HB-KNOX   | TF | ->HB-KNahy.F9ET   | inner.gnm1 | 128        | 63   | -1.029 |        |
| er.gnm1.a | HB-KNOX   | TF | ->HB-KNahy.FN3H   | inner.gnm1 | 44         | 0    | -7.753 |        |
| er.gnm1.a | HB-KNOX   | TF | ->HB-KNahy.U5Q1   | inner.gnm1 | 396        | 90   | -2.134 |        |
| er.gnm1.a | HB-KNOX   | TF | ->HB-KNahy.Z81W   | inner.gnm1 | 23         | 0    | -6.823 |        |
| er.gnm1.a | HB-other  | TF | B->HB-othhy.12HW  | inner.gnm1 | 2182       | 34   | -5.995 |        |
| er.gnm1.a | HB-other  | TF | B->HB-othahy.6BR0 | inner.gnm1 | 188        | 386  | 1.042  |        |
| er.gnm1.a | HB-other  | TF | B->HB-othahy.KEIQ | inner.gnm1 | 1320       | 11   | -6.91  |        |
| er.gnm1.a | HB-WOX    | TF | 3->HB-Wahy.1P3W   | inner.gnm1 | 17         | 50   | 1.56   |        |
| er.gnm1.a | HB-WOX    | TF | 3->HB-Wahy.9WG3   | inner.gnm1 | 41         | 330  | 3.012  |        |
| er.gnm1.a | HB-WOX    | TF | 3->HB-Wahy.H61E   | inner.gnm1 | 75         | 10   | -2.854 |        |
| er.gnm1.a | HB-WOX    | TF | 3->HB-Wahy.LR4Q   | inner.gnm1 | 33         | 0    | -7.378 |        |
| er.gnm1.a | HB-WOX    | TF | 3->HB-Wahy.WG7T   | inner.gnm1 | 1          | 52   | 5.472  |        |
| er.gnm1.a | HMG       | TR | HMG               | ahy.1D56Y  | inner.gnm1 | 168  | 9      | -4.195 |
| er.gnm1.a | HMG       | TR | HMG               | ahy.BLWT   | inner.gnm1 | 197  | 11     | -4.151 |
| er.gnm1.a | HMG       | TR | HMG               | ahy.Y783   | inner.gnm1 | 170  | 2      | -6.839 |
| er.gnm1.a | HMG       | TR | HMG               | ahy.Z3R5   | inner.gnm1 | 264  | 7      | -5.17  |
| er.gnm1.a | HSF       | TF | HSF               | ahy.4L43E  | inner.gnm1 | 1115 | 437    | -1.351 |
| er.gnm1.a | HSF       | TF | HSF               | ahy.7EA4   | inner.gnm1 | 147  | 0      | -9.515 |
| er.gnm1.a | HSF       | TF | HSF               | ahy.7H2V   | inner.gnm1 | 149  | 17     | -3.126 |
| er.gnm1.a | HSF       | TF | HSF               | ahy.8U41   | inner.gnm1 | 649  | 1884   | 1.538  |
| er.gnm1.a | HSF       | TF | HSF               | ahy.B8VX   | inner.gnm1 | 495  | 88     | -2.499 |
| er.gnm1.a | HSF       | TF | HSF               | ahy.FJH25  | inner.gnm1 | 147  | 571    | 1.954  |
| er.gnm1.a | HSF       | TF | HSF               | ahy.FTRM   | inner.gnm1 | 815  | 157    | -2.376 |
| er.gnm1.a | HSF       | TF | HSF               | ahy.M7PL   | inner.gnm1 | 60   | 0      | -8.217 |
| er.gnm1.a | HSF       | TF | HSF               | ahy.W19Z   | inner.gnm1 | 409  | 1256   | 1.62   |
| er.gnm1.a | IWS1      | TR | IWS1              | ahy.SF5C   | inner.gnm1 | 1479 | 730    | -1.02  |
| er.gnm1.a | IWS1      | TR | IWS1              | ahy.TK2Q   | inner.gnm1 | 1704 | 769    | -1.148 |
| er.gnm1.a | Jumonji   | TR | Jumonji           | ahy.9S6A   | inner.gnm1 | 584  | 267    | -1.128 |
| er.gnm1.a | Jumonji   | TR | Jumonji           | ahy.H9D2   | inner.gnm1 | 1976 | 5694   | 1.527  |
| er.gnm1.a | Jumonji   | TR | Jumonji           | ahy.JYC97  | inner.gnm1 | 3913 | 1631   | -1.263 |
| er.gnm1.a | Jumonji   | TR | Jumonji           | ahy.Y876   | inner.gnm1 | 1316 | 3234   | 1.298  |
| er.gnm1.a | LIM       | TF | LIM               | ahy.DE3F   | inner.gnm1 | 82   | 7      | -3.499 |
| er.gnm1.a | LIM       | TF | LIM               | ahy.VFJ7   | inner.gnm1 | 6    | 0      | -5.004 |
| er.gnm1.a | LOB       | TF | LOB               | ahy.54E1   | inner.gnm1 | 10   | 173    | 4.189  |
| er.gnm1.a | LOB       | TF | LOB               | ahy.8GTF   | inner.gnm1 | 170  | 386    | 1.18   |
| er.gnm1.a | LOB       | TF | LOB               | ahy.A5HF   | inner.gnm1 | 12   | 1      | -3.974 |
| er.gnm1.a | LOB       | TF | LOB               | ahy.C3HP   | inner.gnm1 | 1367 | 532    | -1.361 |
| er.gnm1.a | LOB       | TF | LOB               | ahy.DCW7   | inner.gnm1 | 209  | 501    | 1.262  |
| er.gnm1.a | LOB       | TF | LOB               | ahy.HZIC2  | inner.gnm1 | 98   | 43     | -1.178 |



|            |          |    |          |                     |      |      |        |
|------------|----------|----|----------|---------------------|------|------|--------|
| er.gnm1.ar | LOB      | TF | LOB      | ahy.KN2B7inner.gnm1 | 6    | 0    | -4.784 |
| er.gnm1.a  | LOB      | TF | LOB      | ahy.LBX2inner.gnm1  | 16   | 0    | -6.299 |
| er.gnm1.an | LOB      | TF | LOB      | ahy.MBY2inner.gnm1  | 39   | 10   | -1.923 |
| er.gnm1.a  | LOB      | TF | LOB      | ahy.SEL59inner.gnm1 | 43   | 1    | -4.88  |
| er.gnm1.a  | LOB      | TF | LOB      | ahy.WEI7inner.gnm1  | 16   | 264  | 4.07   |
| er.gnm1.ai | LOB      | TF | LOB      | ahy.XFT5Linner.gnm1 | 60   | 1    | -6.388 |
| er.gnm1.ai | LOB      | TF | LOB      | ahy.Z62C6inner.gnm1 | 1183 | 439  | -1.428 |
| er.gnm1.ai | ADS-MIK  | TF | 3->MADS- | ahy.438FZinner.gnm1 | 185  | 697  | 1.915  |
| er.gnm1.ai | ADS-MIK  | TF | 3->MADS- | ahy.8A3Kinner.gnm1  | 96   | 550  | 2.519  |
| er.gnm1.ai | ADS-MIK  | TF | 3->MADS- | ahy.D4F1inner.gnm1  | 248  | 674  | 1.444  |
| er.gnm1.ai | ADS-MIK  | TF | 3->MADS- | ahy.IQR3Ninner.gnm1 | 145  | 1060 | 2.871  |
| er.gnm1.ar | ADS-MIK  | TF | 3->MADS- | ahy.MX0Vinner.gnm1  | 163  | 796  | 2.287  |
| er.gnm1.ar | ADS-MIK  | TF | 3->MADS- | ahy.QB26Vinner.gnm1 | 541  | 1454 | 1.427  |
| er.gnm1.ai | ADS-MIK  | TF | 3->MADS- | ahy.SC2RCinner.gnm1 | 125  | 410  | 1.722  |
| er.gnm1.ai | ADS-MIK  | TF | 3->MADS- | ahy.SLJ44inner.gnm1 | 2475 | 5637 | 1.187  |
| er.gnm1.ar | ADS-MIK  | TF | 3->MADS- | ahy.WIWAinner.gnm1  | 165  | 618  | 1.904  |
| er.gnm1.ai | ADS-MIK  | TF | 3->MADS- | ahy.Z4CR3inner.gnm1 | 457  | 1503 | 1.717  |
| er.gnm1.a  | ADS-M-ty | TF | 3->MADS- | ahy.5M65Zinner.gnm1 | 0    | 16   | 6.561  |
| er.gnm1.ai | ADS-M-ty | TF | 3->MADS- | ahy.GD5Yinner.gnm1  | 185  | 41   | -2.174 |
| er.gnm1.ε  | ADS-M-ty | TF | 3->MADS- | ahy.PIZ1Sinner.gnm1 | 113  | 52   | -1.141 |
| er.gnm1.an | ADS-M-ty | TF | 3->MADS- | ahy.TW1Rinner.gnm1  | 197  | 618  | 1.655  |
| er.gnm1.ai | MBF1     | TR | MBF1     | ahy.1CR6Einner.gnm1 | 1780 | 3648 | 1.035  |
| er.gnm1.a  | MBF1     | TR | MBF1     | ahy.B1IT4inner.gnm1 | 1171 | 2511 | 1.101  |
| er.gnm1.ai | mTERF    | TR | mTERF    | ahy.0G4Linner.gnm1  | 70   | 24   | -1.552 |
| er.gnm1.an | mTERF    | TR | mTERF    | ahy.AYWFinner.gnm1  | 125  | 62   | -1.012 |
| er.gnm1.an | mTERF    | TR | mTERF    | ahy.M5TQinner.gnm1  | 57   | 25   | -1.187 |
| er.gnm1.ai | mTERF    | TR | mTERF    | ahy.SB3XCinner.gnm1 | 364  | 70   | -2.378 |
| er.gnm1.ai | mTERF    | TR | mTERF    | ahy.WZ54inner.gnm1  | 384  | 181  | -1.085 |
| er.gnm1.a  | MYB      | TF | 4YB->MY  | ahy.02XPCinner.gnm1 | 462  | 28   | -4.06  |
| er.gnm1.a  | MYB      | TF | 4YB->MY  | ahy.04JNDinner.gnm1 | 880  | 322  | -1.449 |
| er.gnm1.a  | MYB      | TF | 4YB->MY  | ahy.0KDFinner.gnm1  | 291  | 53   | -2.458 |
| er.gnm1.a  | MYB      | TF | 4YB->MY  | ahy.12J3Vinner.gnm1 | 257  | 79   | -1.703 |
| er.gnm1.a  | MYB      | TF | 4YB->MY  | ahy.28HNinner.gnm1  | 11   | 0    | -4.752 |
| er.gnm1.ai | MYB      | TF | 4YB->MY  | ahy.2BK3Kinner.gnm1 | 580  | 100  | -2.533 |
| er.gnm1.ai | MYB      | TF | 4YB->MY  | ahy.2DN1Zinner.gnm1 | 11   | 1    | -3.897 |
| er.gnm1.a  | MYB      | TF | 4YB->MY  | ahy.2DQFinner.gnm1  | 146  | 33   | -2.16  |
| er.gnm1.ai | MYB      | TF | 4YB->MY  | ahy.55CRFinner.gnm1 | 97   | 12   | -2.963 |
| er.gnm1.ai | MYB      | TF | 4YB->MY  | ahy.57FMZinner.gnm1 | 30   | 10   | -1.486 |
| er.gnm1.ar | MYB      | TF | 4YB->MY  | ahy.A2IWKinner.gnm1 | 503  | 64   | -2.986 |
| er.gnm1.ai | MYB      | TF | 4YB->MY  | ahy.ARS1Finner.gnm1 | 142  | 46   | -1.629 |
| er.gnm1.ai | MYB      | TF | 4YB->MY  | ahy.DPKTinner.gnm1  | 223  | 95   | -1.232 |
| er.gnm1.an | MYB      | TF | 4YB->MY  | ahy.DV7QVinner.gnm1 | 1015 | 420  | -1.273 |
| er.gnm1.ε  | MYB      | TF | 4YB->MY  | ahy.EJIH9inner.gnm1 | 108  | 35   | -1.646 |
| er.gnm1.ai | MYB      | TF | 4YB->MY  | ahy.FS3AFinner.gnm1 | 571  | 284  | -1.007 |
| er.gnm1.a  | MYB      | TF | 4YB->MY  | ahy.H8DJFinner.gnm1 | 158  | 18   | -3.154 |

|            |            |    |                              |      |      |        |
|------------|------------|----|------------------------------|------|------|--------|
| ner.gnm1.a | MYB        | TF | 4YB->MYahy.I2L3Kinner.gnm1   | 25   | 115  | 2.163  |
| ner.gnm1.a | MYB        | TF | 4YB->MYahy.J3K16inner.gnm1   | 21   | 0    | -6.709 |
| ner.gnm1.a | MYB        | TF | 4YB->MYahy.LQREinner.gnm1    | 5    | 26   | 2.363  |
| er.gnm1.a  | MYB        | TF | 4YB->MYahy.MN60inner.gnm1    | 5    | 0    | -4.675 |
| ner.gnm1.a | MYB        | TF | 4YB->MYahy.N15Qinner.gnm1    | 74   | 5    | -3.863 |
| ner.gnm1.a | MYB        | TF | 4YB->MYahy.PR7Ainner.gnm1    | 324  | 12   | -4.721 |
| ner.gnm1.a | MYB        | TF | 4YB->MYahy.QF6Xinner.gnm1    | 162  | 52   | -1.633 |
| ner.gnm1.a | MYB        | TF | 4YB->MYahy.QZK5inner.gnm1    | 131  | 306  | 1.233  |
| er.gnm1.a  | MYB        | TF | 4YB->MYahy.R9MXinner.gnm1    | 2    | 38   | 4.313  |
| er.gnm1.a  | MYB        | TF | 4YB->MYahy.S8NMinner.gnm1    | 891  | 59   | -3.919 |
| ner.gnm1.a | MYB        | TF | 4YB->MYahy.SJGEinner.gnm1    | 793  | 20   | -5.308 |
| ner.gnm1.a | MYB        | TF | 4YB->MYahy.T1CMinner.gnm1    | 548  | 229  | -1.263 |
| ner.gnm1.a | MYB        | TF | 4YB->MYahy.US2SKinner.gnm1   | 306  | 36   | -3.08  |
| er.gnm1.a  | MYB        | TF | 4YB->MYahy.UX5Vinner.gnm1    | 132  | 265  | 1.002  |
| ner.gnm1.a | MYB        | TF | 4YB->MYahy.W3P5inner.gnm1    | 505  | 172  | -1.555 |
| er.gnm1.a  | MYB        | TF | 4YB->MYahy.W7ZTinner.gnm1    | 1043 | 462  | -1.175 |
| er.gnm1.a  | MYB        | TF | 4YB->MYahy.WMRYinner.gnm1    | 86   | 217  | 1.327  |
| er.gnm1.a  | MYB        | TF | 4YB->MYahy.WSM8inner.gnm1    | 518  | 16   | -4.996 |
| ner.gnm1.a | MYB        | TF | 4YB->MYahy.Y8Q1inner.gnm1    | 55   | 121  | 1.147  |
| ner.gnm1.a | MYB        | TF | 4YB->MYahy.YFKHinner.gnm1    | 715  | 1636 | 1.195  |
| ner.gnm1.a | MYB        | TF | 4YB->MYahy.YX3Iinner.gnm1    | 649  | 242  | -1.422 |
| ner.gnm1.a | MYB        | TF | 4YB->MYahy.ZZ8D5inner.gnm1   | 255  | 124  | -1.042 |
| ner.gnm1.a | 4YB-relate | TF | 3->MYB-reahy.006X4inner.gnm1 | 136  | 40   | -1.751 |
| ner.gnm1.a | 4YB-relate | TF | 3->MYB-reahy.18CGFinner.gnm1 | 358  | 135  | -1.4   |
| ner.gnm1.a | 4YB-relate | TF | 3->MYB-reahy.29NKFinner.gnm1 | 39   | 1878 | 5.603  |
| ner.gnm1.a | 4YB-relate | TF | 3->MYB-reahy.2A56inner.gnm1  | 28   | 122  | 2.113  |
| ner.gnm1.a | 4YB-relate | TF | 3->MYB-reahy.3B72Jinner.gnm1 | 35   | 83   | 1.232  |
| ner.gnm1.a | 4YB-relate | TF | 3->MYB-reahy.53JK2inner.gnm1 | 64   | 12   | -2.454 |
| ner.gnm1.a | 4YB-relate | TF | 3->MYB-reahy.53Z0Finner.gnm1 | 12   | 0    | -5.845 |
| ner.gnm1.a | 4YB-relate | TF | 3->MYB-reahy.6ZYPinner.gnm1  | 789  | 142  | -2.48  |
| ner.gnm1.a | 4YB-relate | TF | 3->MYB-reahy.7P5JVinner.gnm1 | 57   | 1    | -5.281 |
| ner.gnm1.a | 4YB-relate | TF | 3->MYB-reahy.B03SCinner.gnm1 | 13   | 40   | 1.599  |
| ner.gnm1.a | 4YB-relate | TF | 3->MYB-reahy.BFP4inner.gnm1  | 22   | 3    | -2.745 |
| ner.gnm1.a | 4YB-relate | TF | 3->MYB-reahy.C0LGinner.gnm1  | 8    | 0    | -5.346 |
| ner.gnm1.a | 4YB-relate | TF | 3->MYB-reahy.CD1Pinner.gnm1  | 606  | 37   | -4.041 |
| ner.gnm1.a | 4YB-relate | TF | 3->MYB-reahy.FP3ASinner.gnm1 | 31   | 1    | -5.388 |
| ner.gnm1.a | 4YB-relate | TF | 3->MYB-reahy.H5DQinner.gnm1  | 134  | 9    | -3.818 |
| ner.gnm1.a | 4YB-relate | TF | 3->MYB-reahy.H8IXFinner.gnm1 | 13   | 0    | -5.068 |
| ner.gnm1.a | 4YB-relate | TF | 3->MYB-reahy.HB1Rinner.gnm1  | 128  | 32   | -1.985 |
| ner.gnm1.a | 4YB-relate | TF | 3->MYB-reahy.IEZ2Linner.gnm1 | 6    | 0    | -4.931 |
| ner.gnm1.a | 4YB-relate | TF | 3->MYB-reahy.K64Rinner.gnm1  | 52   | 833  | 4.008  |
| ner.gnm1.a | 4YB-relate | TF | 3->MYB-reahy.L85IHinner.gnm1 | 313  | 809  | 1.369  |
| er.gnm1.a  | 4YB-relate | TF | 3->MYB-reahy.LQ8VVinner.gnm1 | 517  | 56   | -3.216 |
| ner.gnm1.a | 4YB-relate | TF | 3->MYB-reahy.NV91Iinner.gnm1 | 225  | 16   | -3.834 |
| ner.gnm1.a | 4YB-relate | TF | 3->MYB-reahy.NXJTinner.gnm1  | 40   | 4    | -3.184 |

|            |            |    |                    |            |      |      |        |
|------------|------------|----|--------------------|------------|------|------|--------|
| ner.gnm1.a | MYB-relate | TF | 3->MYB-reahy.R24AV | inner.gnm1 | 146  | 62   | -1.234 |
| ner.gnm1.a | MYB-relate | TF | 3->MYB-reahy.RX2H  | inner.gnm1 | 106  | 14   | -2.924 |
| ner.gnm1.a | MYB-relate | TF | 3->MYB-reahy.S1X8  | inner.gnm1 | 941  | 436  | -1.113 |
| er.gnm1.a  | MYB-relate | TF | 3->MYB-rehy.T7BW   | inner.gnm1 | 1546 | 613  | -1.335 |
| er.gnm1.ar | MYB-relate | TF | 3->MYB-reahy.U5RW  | inner.gnm1 | 35   | 79   | 1.162  |
| er.gnm1.a  | MYB-relate | TF | 3->MYB-rehy.WHG5   | inner.gnm1 | 1410 | 339  | -2.056 |
| ner.gnm1.a | MYB-relate | TF | 3->MYB-reahy.XL1L  | inner.gnm1 | 887  | 44   | -4.337 |
| ner.gnm1.a | MYB-relate | TF | 3->MYB-reahy.XL6S  | inner.gnm1 | 57   | 5    | -3.379 |
| ner.gnm1.a | NAC        | TF | NAC ahy.05SH       | inner.gnm1 | 10   | 0    | -4.613 |
| ner.gnm1.a | NAC        | TF | NAC ahy.0V68X      | inner.gnm1 | 146  | 677  | 2.212  |
| er.gnm1.ar | NAC        | TF | NAC ahy.12HUM      | inner.gnm1 | 402  | 1487 | 1.888  |
| ner.gnm1.a | NAC        | TF | NAC ahy.1GPE       | inner.gnm1 | 9    | 0    | -5.388 |
| ner.gnm1.a | NAC        | TF | NAC ahy.1I167      | inner.gnm1 | 18   | 111  | 2.636  |
| ner.gnm1.a | NAC        | TF | NAC ahy.1UE66      | inner.gnm1 | 3367 | 7477 | 1.151  |
| ner.gnm1.a | NAC        | TF | NAC ahy.2MPS       | inner.gnm1 | 768  | 2731 | 1.83   |
| ner.gnm1.a | NAC        | TF | NAC ahy.2P3Z       | inner.gnm1 | 0    | 7    | 5.392  |
| ner.gnm1.a | NAC        | TF | NAC ahy.3F2LJ      | inner.gnm1 | 87   | 178  | 1.031  |
| ner.gnm1.a | NAC        | TF | NAC ahy.5P3U       | inner.gnm1 | 3    | 98   | 5.33   |
| ner.gnm1.a | NAC        | TF | NAC ahy.76LAE      | inner.gnm1 | 7    | 102  | 3.958  |
| ner.gnm1.a | NAC        | TF | NAC ahy.7G7Sk      | inner.gnm1 | 149  | 321  | 1.109  |
| ner.gnm1.a | NAC        | TF | NAC ahy.8E68Z      | inner.gnm1 | 546  | 2128 | 1.964  |
| ner.gnm1.a | NAC        | TF | NAC ahy.8GCY       | inner.gnm1 | 166  | 747  | 2.168  |
| ner.gnm1.a | NAC        | TF | NAC ahy.9732X      | inner.gnm1 | 14   | 1    | -3.229 |
| ner.gnm1.a | NAC        | TF | NAC ahy.AIPG       | inner.gnm1 | 351  | 43   | -3.025 |
| ner.gnm1.a | NAC        | TF | NAC ahy.B9XE       | inner.gnm1 | 26   | 692  | 4.715  |
| ner.gnm1.a | NAC        | TF | NAC ahy.BEF3       | inner.gnm1 | 14   | 2    | -2.754 |
| ner.gnm1.a | NAC        | TF | NAC ahy.BPCJ       | inner.gnm1 | 538  | 158  | -1.767 |
| ner.gnm1.a | NAC        | TF | NAC ahy.CDPA       | inner.gnm1 | 545  | 156  | -1.811 |
| ner.gnm1.a | NAC        | TF | NAC ahy.D5FDJ      | inner.gnm1 | 700  | 2529 | 1.855  |
| ner.gnm1.a | NAC        | TF | NAC ahy.F01Q5      | inner.gnm1 | 739  | 2903 | 1.974  |
| ner.gnm1.a | NAC        | TF | NAC ahy.FD63A      | inner.gnm1 | 24   | 4    | -2.376 |
| ner.gnm1.a | NAC        | TF | NAC ahy.GU1U       | inner.gnm1 | 6    | 0    | -4.907 |
| ner.gnm1.a | NAC        | TF | NAC ahy.JHHH       | inner.gnm1 | 102  | 36   | -1.522 |
| ner.gnm1.a | NAC        | TF | NAC ahy.K4491      | inner.gnm1 | 133  | 42   | -1.681 |
| ner.gnm1.a | NAC        | TF | NAC ahy.L5HH       | inner.gnm1 | 493  | 2059 | 2.065  |
| er.gnm1.a  | NAC        | TF | NAC ahy.NB8KR      | inner.gnm1 | 3755 | 1832 | -1.036 |
| ner.gnm1.a | NAC        | TF | NAC ahy.Q3Y7       | inner.gnm1 | 525  | 2049 | 1.963  |
| er.gnm1.ar | NAC        | TF | NAC ahy.QL5RC      | inner.gnm1 | 10   | 113  | 3.491  |
| er.gnm1.ar | NAC        | TF | NAC ahy.QVEY       | inner.gnm1 | 22   | 176  | 3.019  |
| ner.gnm1.a | NAC        | TF | NAC ahy.S9FEU      | inner.gnm1 | 3290 | 213  | -3.947 |
| ner.gnm1.a | NAC        | TF | NAC ahy.SJ3Y3      | inner.gnm1 | 6    | 0    | -4.836 |
| ner.gnm1.a | NAC        | TF | NAC ahy.T50EN      | inner.gnm1 | 50   | 9    | -2.549 |
| er.gnm1.ar | NAC        | TF | NAC ahy.TY7W       | inner.gnm1 | 560  | 2005 | 1.84   |
| ner.gnm1.a | NAC        | TF | NAC ahy.UX5J       | inner.gnm1 | 27   | 11   | -1.32  |
| ner.gnm1.a | NAC        | TF | NAC ahy.V0X4S      | inner.gnm1 | 10   | 1    | -3.799 |

|            |        |    |           |                     |      |      |        |
|------------|--------|----|-----------|---------------------|------|------|--------|
| er.gnm1.ar | NAC    | TF | NAC       | ihy.V9YDInner.gnm1  | 11   | 56   | 2.288  |
| er.gnm1.a  | NAC    | TF | NAC       | ahy.XB6KInner.gnm1  | 16   | 787  | 5.57   |
| er.gnm1.a  | NAC    | TF | NAC       | ahy.YY4AInner.gnm1  | 12   | 0    | -4.885 |
| er.gnm1.a  | NAC    | TF | NAC       | ahy.ZM1ICInner.gnm1 | 28   | 1    | -4.278 |
| er.gnm1.ar | NF-YA  | TF | F-Y->NF-Y | ahy.EWBI0Inner.gnm1 | 27   | 4    | -2.633 |
| er.gnm1.a  | NF-YA  | TF | F-Y->NF-Y | ahy.HITKCInner.gnm1 | 334  | 154  | -1.118 |
| er.gnm1.ar | NF-YA  | TF | F-Y->NF-Y | ahy.TY3GKInner.gnm1 | 417  | 172  | -1.277 |
| er.gnm1.a  | NF-YA  | TF | F-Y->NF-Y | ahy.V1T15Inner.gnm1 | 22   | 5    | -2.332 |
| er.gnm1.a  | NF-YB  | TF | F-Y->NF-Y | ahy.8XPX7Inner.gnm1 | 361  | 32   | -3.502 |
| er.gnm1.ar | NF-YB  | TF | F-Y->NF-Y | ahy.BTE5MInner.gnm1 | 450  | 35   | -3.708 |
| er.gnm1.a  | NF-YC  | TF | F-Y->NF-Y | ahy.F7CTLInner.gnm1 | 114  | 249  | 1.118  |
| er.gnm1.a  | NF-YC  | TF | F-Y->NF-Y | ahy.FIIU1Inner.gnm1 | 276  | 1065 | 1.946  |
| er.gnm1.a  | NF-YC  | TF | F-Y->NF-Y | ahy.Y83UCInner.gnm1 | 19   | 58   | 1.583  |
| er.gnm1.a  | NF-YC  | TF | F-Y->NF-Y | ahy.Z93F9Inner.gnm1 | 41   | 14   | -1.517 |
| er.gnm1.a  | Others | TR | Others    | ahy.0MYIInner.gnm1  | 1004 | 398  | -1.336 |
| er.gnm1.ar | Others | TR | Others    | ihy.1U4MInner.gnm1  | 576  | 184  | -1.646 |
| er.gnm1.a  | Others | TR | Others    | ahy.22FLXInner.gnm1 | 18   | 432  | 4.559  |
| er.gnm1.a  | Others | TR | Others    | ahy.4KS3JInner.gnm1 | 963  | 194  | -2.31  |
| er.gnm1.ar | Others | TR | Others    | ahy.64XMInner.gnm1  | 31   | 12   | -1.39  |
| er.gnm1.ar | Others | TR | Others    | ahy.8D0ALInner.gnm1 | 283  | 666  | 1.236  |
| er.gnm1.a  | Others | TR | Others    | ahy.91F6LInner.gnm1 | 114  | 47   | -1.294 |
| er.gnm1.ar | Others | TR | Others    | ahy.AE0X5Inner.gnm1 | 20   | 2    | -3.219 |
| er.gnm1.ar | Others | TR | Others    | ahy.C3DR5Inner.gnm1 | 1418 | 659  | -1.106 |
| er.gnm1.a  | Others | TR | Others    | ahy.D687JInner.gnm1 | 212  | 66   | -1.672 |
| er.gnm1.ar | Others | TR | Others    | ahy.EU8XIInner.gnm1 | 8    | 37   | 2.237  |
| er.gnm1.a  | Others | TR | Others    | ahy.FQS25Inner.gnm1 | 891  | 307  | -1.538 |
| er.gnm1.a  | Others | TR | Others    | ahy.IH9T3Inner.gnm1 | 435  | 1094 | 1.331  |
| er.gnm1.a  | Others | TR | Others    | ahy.IJP2RInner.gnm1 | 83   | 191  | 1.204  |
| er.gnm1.a  | Others | TR | Others    | ahy.IKLL4Inner.gnm1 | 1    | 13   | 3.427  |
| er.gnm1.a  | Others | TR | Others    | ahy.IUYB4Inner.gnm1 | 724  | 1464 | 1.016  |
| er.gnm1.a  | Others | TR | Others    | ahy.K5EF2Inner.gnm1 | 48   | 12   | -2.045 |
| er.gnm1.a  | Others | TR | Others    | ahy.Q1XF5Inner.gnm1 | 64   | 16   | -2.021 |
| er.gnm1.a  | Others | TR | Others    | ahy.QIR43Inner.gnm1 | 386  | 193  | -1.001 |
| er.gnm1.a  | Others | TR | Others    | ahy.TJ20XInner.gnm1 | 373  | 1144 | 1.618  |
| er.gnm1.a  | Others | TR | Others    | ahy.UU73Inner.gnm1  | 587  | 107  | -2.458 |
| er.gnm1.ar | Others | TR | Others    | ihy.WRX7Inner.gnm1  | 83   | 21   | -1.982 |
| er.gnm1.ar | Others | TR | Others    | ahy.Y5JHRInner.gnm1 | 602  | 134  | -2.172 |
| er.gnm1.ar | Others | TR | Others    | ahy.YRC4Inner.gnm1  | 77   | 23   | -1.733 |
| er.gnm1.a  | Others | TR | Others    | ahy.Z2QYInner.gnm1  | 256  | 522  | 1.03   |
| er.gnm1.ar | Others | TR | Others    | ahy.ZRH25Inner.gnm1 | 6    | 321  | 5.863  |
| er.gnm1.a  | PHD    | TR | PHD       | ahy.0IX9EInner.gnm1 | 2    | 27   | 3.883  |
| er.gnm1.ar | PHD    | TR | PHD       | ahy.14DVInner.gnm1  | 59   | 5    | -3.475 |
| er.gnm1.ar | PHD    | TR | PHD       | ahy.1QTR5Inner.gnm1 | 246  | 37   | -2.719 |
| er.gnm1.ar | PHD    | TR | PHD       | ahy.8M1KInner.gnm1  | 27   | 3    | -2.89  |
| er.gnm1.a  | PHD    | TR | PHD       | ahy.EJB0Inner.gnm1  | 90   | 209  | 1.22   |

|                |        |    |          |                     |      |      |        |
|----------------|--------|----|----------|---------------------|------|------|--------|
| ner.gnm1.a     | PHD    | TR | PHD      | ahy.J886Vinner.gnm1 | 66   | 5    | -3.81  |
| ner.gnm1.a     | PHD    | TR | PHD      | ahy.KJ11Sinner.gnm1 | 128  | 37   | -1.793 |
| ier.gnm1.ai    | PHD    | TR | PHD      | ahy.M25Yinner.gnm1  | 30   | 4    | -2.905 |
| ier.gnm1.ai    | PHD    | TR | PHD      | ahy.M25Yinner.gnm1  | 30   | 4    | -2.905 |
| ner.gnm1.a     | PHD    | TR | PHD      | ahy.S706Jinner.gnm1 | 30   | 9    | -1.768 |
| ner.gnm1.a     | PHD    | TR | PHD      | ahy.SI6Minner.gnm1  | 110  | 37   | -1.57  |
| er.gnm1.ar     | PHD    | TR | PHD      | ahy.TXM5inner.gnm1  | 135  | 314  | 1.22   |
| ner.gnm1.a     | PLATZ  | TF | PLATZ    | ahy.C4KZinner.gnm1  | 11   | 1    | -3.92  |
| ier.gnm1.ai    | PLATZ  | TF | PLATZ    | ahy.QDSRinner.gnm1  | 22   | 1    | -4.919 |
| ier.gnm1.a     | PLATZ  | TF | PLATZ    | ahy.RCY4inner.gnm1  | 74   | 26   | -1.529 |
| ier.gnm1.ai    | PLATZ  | TF | PLATZ    | ahy.YU3Linner.gnm1  | 17   | 1    | -4.05  |
| ier.gnm1.aeudo | ARR    | TR | eudo ARR | ahy.PEG0Finner.gnm1 | 1926 | 918  | -1.069 |
| ner.gnm1.aeudo | ARR    | TR | eudo ARR | ahy.V64Ninner.gnm1  | 2866 | 1351 | -1.085 |
| ier.gnm1.a     | RWP-RK | TF | RWP-RK   | ahy.657RUinner.gnm1 | 48   | 177  | 1.868  |
| ner.gnm1.a     | RWP-RK | TF | RWP-RK   | ahy.8R729inner.gnm1 | 192  | 922  | 2.26   |
| ier.gnm1.ai    | RWP-RK | TF | RWP-RK   | ahy.DEK8inner.gnm1  | 62   | 214  | 1.779  |
| ner.gnm1.a     | RWP-RK | TF | RWP-RK   | ahy.DJ079inner.gnm1 | 117  | 48   | -1.29  |
| ner.gnm1.a     | RWP-RK | TF | RWP-RK   | ahy.JSL8Jinner.gnm1 | 405  | 1206 | 1.575  |
| ier.gnm1.ai    | SBP    | TF | SBP      | ahy.18KTSinner.gnm1 | 160  | 3    | -5.778 |
| ier.gnm1.ai    | SBP    | TF | SBP      | ahy.6HMZinner.gnm1  | 165  | 2    | -6.228 |
| ner.gnm1.a     | SBP    | TF | SBP      | ahy.6IJR0inner.gnm1 | 288  | 47   | -2.609 |
| ner.gnm1.a     | SBP    | TF | SBP      | ahy.79TY2inner.gnm1 | 18   | 1    | -4.598 |
| ier.gnm1.ai    | SBP    | TF | SBP      | ahy.B3PCinner.gnm1  | 16   | 0    | -6.28  |
| ier.gnm1.ai    | SBP    | TF | SBP      | ahy.CR8Xinner.gnm1  | 296  | 92   | -1.682 |
| er.gnm1.ar     | SBP    | TF | SBP      | ahy.GW0Dinner.gnm1  | 135  | 0    | -9.392 |
| ier.gnm1.ai    | SBP    | TF | SBP      | ahy.H3CMinner.gnm1  | 42   | 13   | -1.688 |
| ner.gnm1.a     | SBP    | TF | SBP      | ahy.I2W0inner.gnm1  | 283  | 86   | -1.729 |
| ier.gnm1.ai    | SBP    | TF | SBP      | ahy.LT7ELinner.gnm1 | 6    | 0    | -4.814 |
| ner.gnm1.a     | SBP    | TF | SBP      | ahy.TYJ1Finner.gnm1 | 129  | 5    | -4.665 |
| ier.gnm1.ai    | SBP    | TF | SBP      | ahy.YYFQinner.gnm1  | 198  | 12   | -4.062 |
| ner.gnm1.a     | SET    | TR | SET      | ahy.27B95inner.gnm1 | 61   | 8    | -2.927 |
| er.gnm1.ar     | SET    | TR | SET      | ahy.BQLE9inner.gnm1 | 64   | 25   | -1.343 |
| ier.gnm1.ai    | SET    | TR | SET      | ahy.E1ZVinner.gnm1  | 159  | 79   | -1.019 |
| ner.gnm1.a     | SET    | TR | SET      | ahy.HIV44inner.gnm1 | 171  | 4    | -5.554 |
| ier.gnm1.ai    | SET    | TR | SET      | ahy.RN3XIinner.gnm1 | 231  | 68   | -1.763 |
| er.gnm1.ar     | SET    | TR | SET      | ahy.UX6Kinner.gnm1  | 203  | 76   | -1.418 |
| ier.gnm1.a     | SET    | TR | SET      | ahy.YEC9inner.gnm1  | 264  | 55   | -2.265 |
| ier.gnm1.ai    | SET    | TR | SET      | ahy.ZYNVinner.gnm1  | 209  | 64   | -1.712 |
| ier.gnm1.ai    | SNF2   | TR | SNF2     | ahy.3X7Ainner.gnm1  | 529  | 235  | -1.174 |
| ner.gnm1.a     | SNF2   | TR | SNF2     | ahy.5H7Pinner.gnm1  | 337  | 58   | -2.533 |
| ner.gnm1.a     | SNF2   | TR | SNF2     | ahy.97JS8inner.gnm1 | 338  | 154  | -1.139 |
| er.gnm1.an     | SNF2   | TR | SNF2     | ahy.BW40Vinner.gnm1 | 124  | 51   | -1.297 |
| ier.gnm1.ai    | SNF2   | TR | SNF2     | ahy.C2GRinner.gnm1  | 348  | 69   | -2.346 |
| ier.gnm1.ai    | SNF2   | TR | SNF2     | ahy.H93RVinner.gnm1 | 103  | 16   | -2.654 |
| er.gnm1.ai     | SNF2   | TR | SNF2     | ahy.WMY7inner.gnm1  | 650  | 175  | -1.897 |

|            |          |    |          |           |            |      |      |        |
|------------|----------|----|----------|-----------|------------|------|------|--------|
| ner.gnm1.a | SNF2     | TR | SNF2     | ahy.Y7U9  | inner.gnm1 | 259  | 560  | 1.11   |
| ner.gnm1.a | SRS      | TF | SRS      | ahy.BI3DJ | inner.gnm1 | 82   | 442  | 2.43   |
| ner.gnm1.a | SRS      | TF | SRS      | ahy.USG1  | inner.gnm1 | 53   | 293  | 2.471  |
| ner.gnm1.a | /SNF-BAF | TR | /SNF-BAF | ahy.0HJ3T | inner.gnm1 | 1615 | 707  | -1.191 |
| ner.gnm1.a | /SNF-BAF | TR | /SNF-BAF | ahy.2RX1  | inner.gnm1 | 415  | 155  | -1.417 |
| ner.gnm1.a | /SNF-BAF | TR | /SNF-BAF | ahy.4BPU  | inner.gnm1 | 802  | 392  | -1.035 |
| ner.gnm1.a | /SNF-BAF | TR | /SNF-BAF | ahy.JT5AL | inner.gnm1 | 312  | 146  | -1.099 |
| ner.gnm1.a | /SNF-BAF | TR | /SNF-BAF | ahy.MJPM  | inner.gnm1 | 1065 | 445  | -1.26  |
| ner.gnm1.a | /SNF-BAF | TR | /SNF-BAF | ahy.MS53  | inner.gnm1 | 704  | 296  | -1.253 |
| ner.gnm1.a | /SNF-BAF | TR | /SNF-BAF | ahy.PC5DA | inner.gnm1 | 2088 | 661  | -1.66  |
| ner.gnm1.a | TAZ      | TR | TAZ      | ahy.D773L | inner.gnm1 | 203  | 47   | -2.125 |
| ner.gnm1.a | TAZ      | TR | TAZ      | ahy.S20US | inner.gnm1 | 21   | 4    | -2.253 |
| ner.gnm1.a | TCP      | TF | TCP      | ahy.22FU  | inner.gnm1 | 388  | 170  | -1.186 |
| ner.gnm1.a | TCP      | TF | TCP      | ahy.3CY5  | inner.gnm1 | 41   | 131  | 1.686  |
| ner.gnm1.a | TCP      | TF | TCP      | ahy.6V3SV | inner.gnm1 | 194  | 93   | -1.061 |
| ner.gnm1.a | TCP      | TF | TCP      | ahy.7QL5  | inner.gnm1 | 54   | 10   | -2.443 |
| ner.gnm1.a | TCP      | TF | TCP      | ahy.ABQ1  | inner.gnm1 | 370  | 86   | -2.117 |
| ner.gnm1.a | TCP      | TF | TCP      | ahy.Q9YR  | inner.gnm1 | 269  | 121  | -1.157 |
| ner.gnm1.a | TCP      | TF | TCP      | ahy.T0E7S | inner.gnm1 | 64   | 12   | -2.379 |
| ner.gnm1.a | Tify     | TF | Tify     | ahy.25PL5 | inner.gnm1 | 120  | 18   | -2.765 |
| ner.gnm1.a | Tify     | TF | Tify     | ahy.29TRS | inner.gnm1 | 2327 | 514  | -2.18  |
| ner.gnm1.a | Tify     | TF | Tify     | ahy.A76KL | inner.gnm1 | 6    | 60   | 3.191  |
| ner.gnm1.a | Tify     | TF | Tify     | ahy.IG3U  | inner.gnm1 | 25   | 130  | 2.408  |
| ner.gnm1.a | Tify     | TF | Tify     | ahy.P4WX  | inner.gnm1 | 8    | 79   | 3.306  |
| ner.gnm1.a | Tify     | TF | Tify     | ahy.TPQ8  | inner.gnm1 | 58   | 11   | -2.385 |
| ner.gnm1.a | Tify     | TF | Tify     | ahy.WUI6  | inner.gnm1 | 1665 | 251  | -2.733 |
| ner.gnm1.a | TRAF     | TR | TRAF     | ahy.4T73S | inner.gnm1 | 36   | 236  | 2.729  |
| ner.gnm1.a | TRAF     | TR | TRAF     | ahy.71BX  | inner.gnm1 | 903  | 2364 | 1.39   |
| ner.gnm1.a | TRAF     | TR | TRAF     | ahy.825X9 | inner.gnm1 | 62   | 18   | -1.772 |
| ner.gnm1.a | TRAF     | TR | TRAF     | ahy.96G3  | inner.gnm1 | 259  | 103  | -1.327 |
| ner.gnm1.a | TRAF     | TR | TRAF     | ahy.A4KS  | inner.gnm1 | 23   | 1    | -4.944 |
| ner.gnm1.a | TRAF     | TR | TRAF     | ahy.C5K5  | inner.gnm1 | 924  | 297  | -1.639 |
| ner.gnm1.a | TRAF     | TR | TRAF     | ahy.CV66  | inner.gnm1 | 47   | 7    | -2.744 |
| ner.gnm1.a | TRAF     | TR | TRAF     | ahy.D2XT  | inner.gnm1 | 32   | 2    | -3.644 |
| ner.gnm1.a | TRAF     | TR | TRAF     | ahy.K4FB  | inner.gnm1 | 75   | 6    | -3.627 |
| ner.gnm1.a | TRAF     | TR | TRAF     | ahy.Q49Q  | inner.gnm1 | 197  | 399  | 1.02   |
| ner.gnm1.a | TRAF     | TR | TRAF     | ahy.R60CU | inner.gnm1 | 366  | 1061 | 1.534  |
| ner.gnm1.a | TRAF     | TR | TRAF     | ahy.V8EL  | inner.gnm1 | 113  | 50   | -1.176 |
| ner.gnm1.a | TRAF     | TR | TRAF     | ahy.Z47KW | inner.gnm1 | 61   | 368  | 2.585  |
| ner.gnm1.a | TRAF     | TR | TRAF     | ahy.ZSLI3 | inner.gnm1 | 496  | 1322 | 1.415  |
| ner.gnm1.a | Trihelix | TF | Trihelix | ahy.192FJ | inner.gnm1 | 416  | 121  | -1.781 |
| ner.gnm1.a | Trihelix | TF | Trihelix | ahy.22G7  | inner.gnm1 | 390  | 10   | -5.281 |
| ner.gnm1.a | Trihelix | TF | Trihelix | ahy.56MB  | inner.gnm1 | 45   | 238  | 2.417  |
| ner.gnm1.a | Trihelix | TF | Trihelix | ahy.6ZR4  | inner.gnm1 | 4253 | 912  | -2.222 |
| ner.gnm1.a | Trihelix | TF | Trihelix | ahy.708L2 | inner.gnm1 | 346  | 95   | -1.876 |

|            |          |    |          |                      |      |      |        |
|------------|----------|----|----------|----------------------|------|------|--------|
| ner.gnm1.a | Trihelix | TF | Trihelix | ahy.FP0N\inner.gnm1  | 918  | 306  | -1.587 |
| ner.gnm1.a | Trihelix | TF | Trihelix | ahy.IGA8\inner.gnm1  | 2340 | 544  | -2.106 |
| ner.gnm1.a | Trihelix | TF | Trihelix | ahy.K6EU\inner.gnm1  | 1625 | 293  | -2.471 |
| ner.gnm1.a | Trihelix | TF | Trihelix | ahy.Q5JG\inner.gnm1  | 264  | 1245 | 2.241  |
| ner.gnm1.a | Trihelix | TF | Trihelix | ahy.UTRD\inner.gnm1  | 104  | 260  | 1.323  |
| er.gnm1.a  | Trihelix | TF | Trihelix | ahy.WDZX\inner.gnm1  | 1861 | 508  | -1.875 |
| ner.gnm1.a | Trihelix | TF | Trihelix | ahy.XCJ6\inner.gnm1  | 62   | 196  | 1.664  |
| er.gnm1.a  | Trihelix | TF | Trihelix | ahy.XW1W\inner.gnm1  | 89   | 194  | 1.13   |
| ner.gnm1.a | TUB      | TF | TUB      | ahy.597RP\inner.gnm1 | 15   | 2    | -3.073 |
| ner.gnm1.a | TUB      | TF | TUB      | ahy.HE2F\inner.gnm1  | 6    | 0    | -4.81  |
| ner.gnm1.a | TUB      | TF | TUB      | ahy.PAJJ3\inner.gnm1 | 8    | 0    | -4.338 |
| ner.gnm1.a | TUB      | TF | TUB      | ahy.PAJJ3\inner.gnm1 | 8    | 0    | -4.338 |
| ner.gnm1.a | ULT      | TF | ULT      | ahy.F3JNC\inner.gnm1 | 165  | 383  | 1.216  |
| ner.gnm1.a | WRKY     | TF | WRKY     | ahy.091A4\inner.gnm1 | 536  | 2295 | 2.1    |
| ner.gnm1.a | WRKY     | TF | WRKY     | ahy.0S4LA\inner.gnm1 | 8    | 51   | 2.655  |
| ner.gnm1.a | WRKY     | TF | WRKY     | ahy.1T4KV\inner.gnm1 | 11   | 131  | 3.623  |
| ner.gnm1.a | WRKY     | TF | WRKY     | ahy.34PM\inner.gnm1  | 3    | 16   | 2.673  |
| ner.gnm1.a | WRKY     | TF | WRKY     | ahy.3BGC\inner.gnm1  | 279  | 684  | 1.291  |
| ner.gnm1.a | WRKY     | TF | WRKY     | ahy.431KF\inner.gnm1 | 1339 | 233  | -2.524 |
| ner.gnm1.a | WRKY     | TF | WRKY     | ahy.4IR4X\inner.gnm1 | 71   | 214  | 1.591  |
| ner.gnm1.a | WRKY     | TF | WRKY     | ahy.74VG\inner.gnm1  | 12   | 47   | 2.031  |
| ner.gnm1.a | WRKY     | TF | WRKY     | ahy.77CZV\inner.gnm1 | 49   | 192  | 1.971  |
| ner.gnm1.a | WRKY     | TF | WRKY     | ahy.9C1IJ\inner.gnm1 | 13   | 63   | 2.214  |
| ner.gnm1.a | WRKY     | TF | WRKY     | ahy.A3UL\inner.gnm1  | 2881 | 559  | -2.367 |
| ner.gnm1.a | WRKY     | TF | WRKY     | ahy.ALL8\inner.gnm1  | 46   | 326  | 2.834  |
| ner.gnm1.a | WRKY     | TF | WRKY     | ahy.B1IT3\inner.gnm1 | 1098 | 209  | -2.393 |
| ner.gnm1.a | WRKY     | TF | WRKY     | ahy.EVAW\inner.gnm1  | 9    | 211  | 4.61   |
| ner.gnm1.a | WRKY     | TF | WRKY     | ahy.EXY7\inner.gnm1  | 3    | 34   | 3.61   |
| er.gnm1.a  | WRKY     | TF | WRKY     | ahy.GV8AV\inner.gnm1 | 233  | 802  | 1.785  |
| ner.gnm1.a | WRKY     | TF | WRKY     | ahy.I0TYP\inner.gnm1 | 2    | 27   | 3.498  |
| ner.gnm1.a | WRKY     | TF | WRKY     | ahy.JRMF\inner.gnm1  | 424  | 1936 | 2.19   |
| ner.gnm1.a | WRKY     | TF | WRKY     | ahy.K37UF\inner.gnm1 | 420  | 82   | -2.366 |
| ner.gnm1.a | WRKY     | TF | WRKY     | ahy.LLK2\inner.gnm1  | 14   | 119  | 3.16   |
| ner.gnm1.a | WRKY     | TF | WRKY     | ahy.NA5G\inner.gnm1  | 46   | 152  | 1.745  |
| ner.gnm1.a | WRKY     | TF | WRKY     | ahy.P7H0\inner.gnm1  | 3    | 63   | 4.501  |
| ner.gnm1.a | WRKY     | TF | WRKY     | ahy.P8AW\inner.gnm1  | 291  | 101  | -1.52  |
| ner.gnm1.a | WRKY     | TF | WRKY     | ahy.TAM8\inner.gnm1  | 862  | 395  | -1.127 |
| ner.gnm1.a | WRKY     | TF | WRKY     | ahy.TC7Y\inner.gnm1  | 22   | 319  | 3.872  |
| ner.gnm1.a | WRKY     | TF | WRKY     | ahy.W479C\inner.gnm1 | 2    | 18   | 3.258  |
| er.gnm1.a  | WRKY     | TF | WRKY     | ahy.WH9G\inner.gnm1  | 3815 | 427  | -3.161 |
| ner.gnm1.a | WRKY     | TF | WRKY     | ahy.Y4PU\inner.gnm1  | 1077 | 480  | -1.168 |
| ner.gnm1.a | WRKY     | TF | WRKY     | ahy.YJ3JQ\inner.gnm1 | 295  | 57   | -2.384 |
| ner.gnm1.a | WRKY     | TF | WRKY     | ahy.ZN7Y\inner.gnm1  | 729  | 1709 | 1.231  |

ion factors in the testa of R4 and R7 stages of Shanhua15 and Zhonghua12 peanut

| pvalue   | FDR      | regulated | Start    | End      | Strand | Length | Type       | GO           |
|----------|----------|-----------|----------|----------|--------|--------|------------|--------------|
| 1.06E-06 | 1.59E-05 | down      | 25700643 | 25707477 | -      | 6835   | otein_codi | matin moc    |
| 0.008809 | 0.035595 | down      | 2284303  | 2288329  | -      | 4027   | otein_codi | ethylene-ac  |
| 1.35E-09 | 3.99E-08 | down      | 4028297  | 4032342  | -      | 4046   | otein_codi | ethylene-ac  |
| 0.002042 | 0.010763 | up        | 32463332 | 32473037 | +      | 9706   | otein_codi | #####        |
| 0.000407 | 0.002791 | up        | 1473987  | 1474718  | +      | 732    | otein_codi | #####        |
| 3.84E-07 | 6.4E-06  | down      | 16755329 | 16758854 | -      | 3526   | otein_codi | #####        |
| 0.006801 | 0.028862 | up        | 7894918  | 7895406  | +      | 489    | otein_codi | or activity; |
| 2.6E-05  | 0.000263 | up        | 7941002  | 7944524  | +      | 3523   | otein_codi | #####        |
| 0.008094 | 0.033286 | down      | 9932157  | 9933686  | +      | 1530   | otein_codi | #####        |
| 0.001122 | 0.006564 | down      | 7805280  | 7807646  | +      | 2367   | otein_codi | #####        |
| 8.57E-14 | 5.55E-12 | down      | 1.35E+08 | 1.35E+08 | -      | 1262   | otein_codi | or activity; |
| 0.005347 | 0.023735 | down      | 1280507  | 1281121  | +      | 615    | otein_codi | #####        |
| 0.007678 | 0.031945 | up        | 98737122 | 98739745 | -      | 2624   | otein_codi | #####        |
| 0.000223 | 0.001672 | down      | 17225079 | 17227847 | -      | 2769   | otein_codi | #####        |
| 0.001994 | 0.010567 | up        | 23090442 | 23091197 | -      | 756    | otein_codi | #####        |
| 0.002286 | 0.011815 | up        | 40014506 | 40015132 | +      | 627    | otein_codi | 0009873,eti  |
| 3.19E-09 | 8.62E-08 | down      | 1.04E+08 | 1.04E+08 | -      | 1320   | otein_codi | or activity; |
| 1.06E-05 | 0.00012  | down      | 8822894  | 8823409  | +      | 516    | otein_codi | #####        |
| 2.62E-05 | 0.000265 | up        | 1898822  | 1899271  | -      | 450    | otein_codi | iption factc |
| 0.008031 | 0.033066 | up        | 4016328  | 4016792  | -      | 465    | otein_codi | iption factc |
| 4.12E-06 | 5.28E-05 | down      | 3355306  | 3356774  | +      | 1469   | otein_codi | #####        |
| 7.36E-09 | 1.82E-07 | down      | 22752359 | 22758481 | +      | 6123   | otein_codi | --           |
| 0.000109 | 0.000913 | up        | 1.17E+08 | 1.17E+08 | +      | 1521   | otein_codi | #####        |
| 0.002188 | 0.011402 | down      | 1.32E+08 | 1.32E+08 | -      | 4635   | otein_codi | --           |
| 1.28E-14 | 9.3E-13  | down      | 29751754 | 29757840 | -      | 6087   | otein_codi | #####        |
| 0.010055 | 0.03955  | up        | 7823873  | 7824358  | +      | 486    | otein_codi | or activity; |
| 0.000401 | 0.002756 | up        | 8231560  | 8232651  | +      | 1092   | otein_codi | #####        |
| 1.37E-05 | 0.000151 | down      | 1.1E+08  | 1.1E+08  | -      | 1248   | otein_codi | 873,ethylei  |
| 6.14E-07 | 9.79E-06 | down      | 1.16E+08 | 1.16E+08 | -      | 5440   | otein_codi | #####        |
| 0.009649 | 0.038295 | down      | 1.52E+08 | 1.52E+08 | +      | 5422   | otein_codi | #####        |
| 1.07E-05 | 0.000121 | down      | 36394941 | 36397501 | -      | 2561   | otein_codi | in-activatec |
| 0.000358 | 0.002501 | down      | 14610162 | 14612037 | -      | 1876   | otein_codi | 355,regulat  |
| 1.41E-15 | 1.21E-13 | up        | 88013839 | 88016187 | -      | 2349   | otein_codi | 355,regulat  |
| 3.74E-09 | 9.9E-08  | down      | 843705   | 846614   | -      | 2910   | otein_codi | --           |
| 0.012223 | 0.046147 | down      | 34350703 | 34353156 | -      | 2454   | otein_codi | in-activatec |
| 2.83E-07 | 4.91E-06 | up        | 14659380 | 14665897 | +      | 6518   | otein_codi | 355,regulat  |
| 6.56E-08 | 1.32E-06 | down      | 52772777 | 52775165 | -      | 2389   | otein_codi | in-activatec |
| 7.25E-06 | 8.71E-05 | down      | 1179747  | 1182310  | +      | 2564   | otein_codi | in-activatec |
| 6.07E-13 | 3.35E-11 | down      | 79895559 | 79898101 | -      | 2543   | otein_codi | in-activatec |
| 5.59E-06 | 6.91E-05 | down      | 1.32E+08 | 1.32E+08 | +      | 3537   | otein_codi | inding; GO:( |
| 5.59E-06 | 6.91E-05 | down      | 1.32E+08 | 1.32E+08 | +      | 3537   | otein_codi | inding; GO:( |
| 3.82E-07 | 6.36E-06 | down      | 88861113 | 88864141 | +      | 3029   | otein_codi | #####        |
| 2.22E-05 | 0.000229 | down      | 1.17E+08 | 1.17E+08 | -      | 2391   | otein_codi | 355,regulat  |



|          |          |      |          |          |   |       |                         |
|----------|----------|------|----------|----------|---|-------|-------------------------|
| 0.000548 | 0.003592 | up   | 87976295 | 87977546 | - | 1252  | otein_codiition of tran |
| 1.64E-06 | 2.34E-05 | up   | 1611710  | 1614661  | + | 2952  | otein_codi --           |
| 2.07E-05 | 0.000216 | down | 19084887 | 19087046 | + | 2160  | otein_codiition of tran |
| 0.000103 | 0.000869 | down | 7948779  | 7950524  | - | 1746  | otein_codiition of tran |
| 0.000461 | 0.003098 | up   | 94126775 | 94130769 | - | 3995  | otein_codi --           |
| 3.19E-07 | 5.45E-06 | up   | 42638591 | 42643609 | - | 5019  | otein_codi --           |
| 0.000339 | 0.002392 | down | 97440973 | 97443938 | - | 2966  | otein_codiition of tran |
| 0.008379 | 0.034234 | down | 32002250 | 32004242 | - | 1993  | otein_codiition of tran |
| 0.000183 | 0.001411 | up   | 1.31E+08 | 1.31E+08 | - | 5355  | otein_codi #####        |
| 0.006611 | 0.028182 | up   | 93201972 | 93211684 | - | 9713  | otein_codi0006355,rc    |
| 5.48E-06 | 6.8E-05  | down | 1.31E+08 | 1.31E+08 | - | 2306  | otein_codi --           |
| 7.99E-07 | 1.23E-05 | down | 1.54E+08 | 1.54E+08 | - | 1717  | otein_codin; GO:0006    |
| 2.45E-05 | 0.00025  | up   | 4150790  | 4153634  | + | 2845  | otein_codi --           |
| 2.6E-07  | 4.53E-06 | up   | 1666853  | 1669792  | - | 2940  | otein_codi developm     |
| 6.77E-07 | 1.07E-05 | up   | 1610947  | 1614946  | + | 4000  | otein_codiway; GO:00    |
| 0.000313 | 0.002235 | down | 1.47E+08 | 1.47E+08 | + | 2561  | otein_codiway; GO:00    |
| 8.59E-05 | 0.000744 | down | 28409812 | 28416517 | - | 6706  | otein_codi #####        |
| 8.89E-11 | 3.28E-09 | down | 4111347  | 4117372  | + | 6026  | otein_codi #####        |
| 0.000641 | 0.004104 | down | 10728298 | 10735524 | - | 7227  | otein_codiway; GO:00    |
| 9.37E-13 | 4.98E-11 | down | 4159776  | 4166467  | - | 6692  | otein_codi #####        |
| 0.000988 | 0.005908 | down | 22912943 | 22917489 | + | 4547  | otein_codispecific DN   |
| 0.009602 | 0.038143 | up   | 96759870 | 96766284 | + | 6415  | otein_codispecific DN   |
| 1.33E-07 | 2.5E-06  | up   | 3391202  | 3395370  | + | 4169  | otein_codiway; GO:00    |
| 4.26E-06 | 5.44E-05 | down | 2017414  | 2023492  | + | 6079  | otein_codiway; GO:00    |
| 0.001523 | 0.008459 | up   | 6307     | 9576     | + | 3270  | otein_codiway; GO:00    |
| 5.07E-19 | 7.49E-17 | down | 25467997 | 25471531 | + | 3535  | otein_codi:0080113,r    |
| 2.32E-05 | 0.000238 | down | 19902705 | 19905937 | + | 3233  | otein_codi #####        |
| 6.59E-07 | 1.04E-05 | down | 8402801  | 8404872  | - | 2072  | otein_codi,protein din  |
| 0.002461 | 0.012527 | down | 9824380  | 9828012  | + | 3633  | otein_codi,protein din  |
| 9.53E-11 | 3.48E-09 | down | 46375335 | 46378139 | + | 2805  | otein_codi,protein din  |
| 5.56E-14 | 3.68E-12 | down | 1.08E+08 | 1.08E+08 | - | 3041  | otein_codiD:0006355,    |
| 0.00011  | 0.000915 | down | 1.16E+08 | 1.16E+08 | + | 4424  | otein_codi #####        |
| 8.88E-10 | 2.73E-08 | down | 1.14E+08 | 1.14E+08 | + | 12090 | otein_codir process; C  |
| 1.53E-13 | 9.52E-12 | up   | 1.02E+08 | 1.02E+08 | + | 1066  | otein_codi #####        |
| 3.13E-07 | 5.36E-06 | down | 1086647  | 1089206  | - | 2560  | otein_codi factor acti  |
| 0.007336 | 0.030762 | up   | 1.45E+08 | 1.45E+08 | - | 5212  | otein_codi #####        |
| 0.000316 | 0.00225  | down | 955171   | 960423   | - | 5253  | otein_codi:3565,sequ    |
| 0.009781 | 0.038693 | down | 2468242  | 2476478  | - | 8237  | otein_codir process; C  |
| 6.83E-12 | 3.09E-10 | down | 7345694  | 7348877  | - | 3184  | otein_codi #####        |
| 0.008811 | 0.035598 | down | 1.19E+08 | 1.19E+08 | + | 4498  | otein_codi #####        |
| 0.004402 | 0.020271 | down | 731267   | 733832   | + | 2566  | otein_codi #####        |
| 0.000618 | 0.003979 | down | 9980272  | 9982233  | + | 1962  | otein_codi #####        |
| 2.6E-16  | 2.56E-14 | down | 50118700 | 50121735 | + | 3036  | otein_codi --           |
| 0.001843 | 0.009919 | up   | 11043755 | 11045255 | + | 1501  | otein_codi #####        |
| 1.15E-09 | 3.45E-08 | up   | 1.32E+08 | 1.32E+08 | - | 3740  | otein_codi #####        |

|          |          |      |          |          |   |       |                        |
|----------|----------|------|----------|----------|---|-------|------------------------|
| 0.009109 | 0.036564 | down | 1.32E+08 | 1.32E+08 | - | 2607  | otein_codi #####       |
| 2.77E-13 | 1.63E-11 | down | 1048779  | 1052077  | - | 3299  | otein_codi,protein din |
| 0.006704 | 0.028509 | down | 1.57E+08 | 1.57E+08 | - | 2717  | otein_codi --          |
| 0.000242 | 0.001798 | down | 1.34E+08 | 1.34E+08 | - | 2539  | otein_codi #####       |
| 4.1E-06  | 5.26E-05 | down | 10594948 | 10597069 | - | 2122  | otein_codi,protein din |
| 1.18E-17 | 1.43E-15 | down | 15802995 | 15815996 | + | 13002 | otein_codi process; C  |
| 6.94E-12 | 3.13E-10 | down | 1.33E+08 | 1.33E+08 | - | 2449  | otein_codiD:0006355,   |
| 4.05E-12 | 1.92E-10 | up   | 26752843 | 26756242 | + | 3400  | otein_codi,protein din |
| 9.21E-05 | 0.00079  | down | 37446703 | 37449482 | + | 2780  | otein_codi,protein din |
| 0.001011 | 0.00602  | down | 87721533 | 87724859 | + | 3327  | otein_codi #####       |
| 0.000271 | 0.00198  | down | 4730198  | 4731619  | + | 1422  | otein_codi #####       |
| 5.43E-08 | 1.11E-06 | up   | 4288893  | 4292280  | - | 3388  | otein_codi #####       |
| 0.00603  | 0.02616  | down | 13533419 | 13537044 | + | 3626  | otein_codi,protein din |
| 0.012626 | 0.047308 | down | 54831707 | 54834737 | - | 3031  | otein_codi #####       |
| 4.27E-05 | 0.000406 | down | 1.07E+08 | 1.07E+08 | - | 4468  | otein_codi #####       |
| 0.000477 | 0.003192 | down | 1.34E+08 | 1.34E+08 | - | 5769  | otein_codi #####       |
| 1.29E-12 | 6.66E-11 | down | 4870759  | 4874187  | - | 3429  | otein_codi #####       |
| 2.51E-07 | 4.4E-06  | down | 4295543  | 4298069  | - | 2527  | otein_codi,protein din |
| 3.87E-11 | 1.53E-09 | up   | 25512126 | 25515278 | - | 3153  | otein_codi,protein din |
| 6.39E-05 | 0.000576 | up   | 66166541 | 66169596 | + | 3056  | otein_codi #####       |
| 2E-11    | 8.28E-10 | up   | 21527344 | 21530900 | + | 3557  | otein_codi #####       |
| 2.4E-07  | 4.23E-06 | up   | 36740553 | 36743185 | - | 2633  | otein_codi #####       |
| 0.004742 | 0.021534 | up   | 1.23E+08 | 1.23E+08 | - | 2202  | otein_codi #####       |
| 0.007098 | 0.02994  | down | 1.42E+08 | 1.42E+08 | - | 3419  | otein_codi,protein din |
| 6.91E-16 | 6.4E-14  | down | 99327035 | 99331216 | + | 4182  | otein_codi #####       |
| 8.35E-05 | 0.000726 | down | 4398415  | 4401338  | - | 2924  | otein_codi,protein din |
| 0.005357 | 0.023775 | up   | 4790190  | 4792892  | + | 2703  | otein_codi,protein din |
| 4.87E-09 | 1.26E-07 | down | 7061693  | 7064500  | - | 2808  | otein_codi,protein din |
| 2.11E-09 | 5.97E-08 | down | 17825877 | 17828689 | + | 2813  | otein_codi factor acti |
| 1.53E-10 | 5.36E-09 | up   | 1.29E+08 | 1.29E+08 | - | 4687  | otein_codi #####       |
| 3.49E-09 | 9.31E-08 | down | 1.12E+08 | 1.12E+08 | - | 5025  | otein_codi #####       |
| 0.002346 | 0.012064 | down | 57185713 | 57189750 | - | 4038  | otein_codi #####       |
| 1.18E-07 | 2.26E-06 | down | 13568223 | 13570653 | - | 2431  | otein_codi factor acti |
| 3.87E-09 | 1.02E-07 | down | 1.51E+08 | 1.51E+08 | - | 4935  | otein_codi #####       |
| 0.003641 | 0.017372 | down | 266600   | 269484   | - | 2885  | otein_codi,protein din |
| 4.73E-06 | 5.96E-05 | down | 4744641  | 4746421  | - | 1781  | otein_codi factor acti |
| 0.009568 | 0.03804  | up   | 6050204  | 6053111  | + | 2908  | otein_codi,protein din |
| 0.000928 | 0.005608 | down | 1.3E+08  | 1.3E+08  | - | 2670  | otein_codi factor acti |
| 0.000415 | 0.002837 | up   | 22642153 | 22643953 | + | 1801  | otein_codi #####       |
| 2.76E-09 | 7.59E-08 | down | 12159290 | 12163476 | + | 4187  | otein_codi #####       |
| 0.000404 | 0.002774 | down | 97379079 | 97385073 | + | 5995  | otein_codi #####       |
| 7.08E-05 | 0.00063  | up   | 1.59E+08 | 1.59E+08 | - | 2734  | otein_codi binding tr  |
| 0.000245 | 0.001813 | down | 1.17E+08 | 1.17E+08 | - | 5069  | otein_codi,ence-speci  |
| 2.52E-22 | 5.95E-20 | up   | 5876309  | 5876683  | - | 375   | otein_codi #####       |
| 0.002205 | 0.01147  | up   | 1.1E+08  | 1.1E+08  | + | 6863  | otein_codi65,sequenc   |

|          |          |      |          |          |   |      |                         |
|----------|----------|------|----------|----------|---|------|-------------------------|
| 0.000106 | 0.000891 | up   | 1.27E+08 | 1.27E+08 | - | 4308 | otein_codi044212,tra    |
| 1.83E-11 | 7.6E-10  | down | 22983987 | 22990037 | + | 6051 | otein_codi #####        |
| 0.000247 | 0.001824 | down | 47734426 | 47742974 | + | 8549 | otein_codi #####        |
| 1.31E-06 | 1.91E-05 | up   | 6346989  | 6353680  | - | 6692 | otein_codi #####        |
| 2.1E-05  | 0.000219 | up   | 52402349 | 52405322 | - | 2974 | otein_codi #####        |
| 3.02E-06 | 4.02E-05 | down | 3820645  | 3824182  | - | 3538 | otein_codi binding tr   |
| 0.003412 | 0.016444 | up   | 11045167 | 11045571 | - | 405  | otein_codi #####        |
| 1.23E-05 | 0.000138 | up   | 23833951 | 23839123 | + | 5173 | otein_codi044212,tra    |
| 0.00515  | 0.023033 | up   | 1658283  | 1662607  | + | 4325 | otein_codi #####        |
| 0.006132 | 0.026524 | up   | 72291302 | 72296528 | + | 5227 | otein_codi #####        |
| 4.88E-18 | 6.33E-16 | down | 24326734 | 24331766 | + | 5033 | otein_codi #####        |
| 1.85E-05 | 0.000196 | up   | 1.22E+08 | 1.22E+08 | - | 7182 | otein_codi65,sequenc    |
| 0.00095  | 0.005718 | up   | 1.14E+08 | 1.14E+08 | - | 2632 | otein_codi binding tr   |
| 9.78E-06 | 0.000112 | up   | 10302740 | 10309738 | - | 6999 | otein_codiGO:004356     |
| 0.002742 | 0.013704 | down | 16794729 | 16798308 | + | 3580 | otein_codi binding tr   |
| 0.000651 | 0.004158 | down | 1.43E+08 | 1.43E+08 | - | 5147 | otein_codi --           |
| 2.58E-15 | 2.12E-13 | up   | 1.24E+08 | 1.24E+08 | - | 4296 | otein_codi044212,tra    |
| 6.96E-07 | 1.09E-05 | up   | 1.14E+08 | 1.14E+08 | - | 768  | otein_codi #####        |
| 6.33E-09 | 1.59E-07 | down | 34602480 | 34606092 | + | 3613 | otein_codi #####        |
| 1.31E-06 | 1.92E-05 | up   | 1132695  | 1133483  | + | 789  | otein_codi #####        |
| 6.25E-06 | 7.63E-05 | down | 19494561 | 19498164 | + | 3604 | otein_codi binding tr   |
| 5.28E-07 | 8.55E-06 | down | 27396337 | 27400963 | + | 4627 | otein_codi #####        |
| 4.38E-05 | 0.000415 | down | 36437808 | 36440469 | + | 2662 | otein_codiactor activit |
| 9.49E-20 | 1.56E-17 | down | 1.55E+08 | 1.55E+08 | + | 1777 | otein_codiactor activit |
| 4.68E-06 | 5.91E-05 | down | 1.18E+08 | 1.18E+08 | - | 2159 | otein_codi9,regulatio   |
| 1.1E-10  | 3.95E-09 | down | 1.14E+08 | 1.14E+08 | - | 2044 | otein_codiactor activit |
| 0.001432 | 0.008048 | down | 96109143 | 96111539 | - | 2397 | otein_codi9,regulatio   |
| 1.79E-20 | 3.3E-18  | down | 38660582 | 38663247 | + | 2666 | otein_codiactor activit |
| 4.98E-18 | 6.44E-16 | down | 81197429 | 81199604 | + | 2176 | otein_codi #####        |
| 7.79E-05 | 0.000684 | down | 4383704  | 4384094  | + | 391  | otein_codi ription reg  |
| 8.59E-07 | 1.31E-05 | down | 4010800  | 4012960  | + | 2161 | otein_codi --           |
| 6.38E-06 | 7.77E-05 | down | 6355145  | 6355843  | - | 699  | otein_codi #####        |
| 0.000447 | 0.003017 | up   | 49590798 | 49594441 | + | 3644 | otein_codi:0006355,r    |
| 1.98E-08 | 4.52E-07 | down | 27421913 | 27424062 | - | 2150 | otein_codi --           |
| 0.000707 | 0.004454 | down | 5095546  | 5096241  | - | 696  | otein_codi #####        |
| 0.009409 | 0.037571 | up   | 3697429  | 3699062  | + | 1634 | otein_codi #####        |
| 2.9E-05  | 0.000289 | down | 1.31E+08 | 1.31E+08 | - | 2041 | otein_codi #####        |
| 0.005379 | 0.023854 | down | 2277175  | 2277465  | + | 291  | otein_codi:0006355,r    |
| 3.8E-05  | 0.000366 | down | 1.06E+08 | 1.06E+08 | - | 2356 | otein_codi #####        |
| 0.001254 | 0.007196 | up   | 1600992  | 1602950  | + | 1959 | otein_codi #####        |
| 1.15E-28 | 5.79E-26 | down | 98770357 | 98772872 | + | 2516 | otein_codi #####        |
| 5.65E-05 | 0.000518 | down | 28190625 | 28192560 | + | 1936 | otein_codi46872,met     |
| 1.12E-06 | 1.67E-05 | up   | 5221663  | 5223445  | + | 1783 | otein_codi --           |
| 9.46E-06 | 0.000109 | up   | 7152193  | 7153638  | - | 1446 | otein_codi:0006355,r    |
| 6.44E-09 | 1.62E-07 | up   | 1.21E+08 | 1.21E+08 | - | 1458 | otein_codi6872,metal    |

|          |          |      |          |          |   |      |            |              |
|----------|----------|------|----------|----------|---|------|------------|--------------|
| 1.01E-12 | 5.32E-11 | down | 1.28E+08 | 1.28E+08 | - | 1928 | otein_codi | --           |
| 0.00049  | 0.003264 | down | 2271177  | 2271467  | + | 291  | otein_codi | :0006355,r   |
| 4.25E-05 | 0.000404 | down | 3413615  | 3415486  | - | 1872 | otein_codi | #####        |
| 0.00012  | 0.000988 | up   | 4399729  | 4400262  | + | 534  | otein_codi | :0006355,r   |
| 0.006612 | 0.028183 | down | 10491801 | 10493761 | + | 1961 | otein_codi | #####        |
| 0.000299 | 0.002149 | up   | 1.47E+08 | 1.47E+08 | + | 3675 | otein_codi | --           |
| 1.39E-09 | 4.12E-08 | down | 5609802  | 5611642  | - | 1841 | otein_codi | #####        |
| 2.3E-06  | 3.18E-05 | down | 1.26E+08 | 1.26E+08 | + | 1732 | otein_codi | #####        |
| 1.78E-07 | 3.25E-06 | down | 94867241 | 94868959 | + | 1719 | otein_codi | #####        |
| 0.003491 | 0.016764 | up   | 1.19E+08 | 1.19E+08 | - | 3795 | otein_codi | --           |
| 0.001821 | 0.009826 | down | 3033691  | 3036478  | - | 2788 | otein_codi | #####        |
| 7.08E-05 | 0.000629 | down | 70664814 | 70666699 | + | 1886 | otein_codi | #####        |
| 0.008454 | 0.034458 | up   | 94416228 | 94420390 | - | 4163 | otein_codi | #####        |
| 2.07E-07 | 3.69E-06 | down | 40081224 | 40088225 | - | 7002 | otein_codi | #####        |
| 0.000329 | 0.002328 | up   | 1.36E+08 | 1.36E+08 | - | 1521 | otein_codi | --           |
| 2.34E-07 | 4.13E-06 | up   | 1.38E+08 | 1.38E+08 | - | 1530 | otein_codi | --           |
| 0.002357 | 0.012104 | down | 20861262 | 20864282 | + | 3021 | otein_codi | #####        |
| 2.54E-17 | 2.93E-15 | down | 17847302 | 17852480 | - | 5179 | otein_codi | #####        |
| 0.002064 | 0.010862 | down | 46910694 | 46911668 | + | 975  | otein_codi | )3676,nuclo  |
| 3.73E-16 | 3.62E-14 | up   | 66363355 | 66365464 | + | 2110 | otein_codi | --           |
| 2.72E-05 | 0.000273 | up   | 5266770  | 5267672  | + | 903  | otein_codi | ,sequence-s  |
| 3.89E-06 | 5.03E-05 | up   | 3510985  | 3511473  | - | 489  | otein_codi | #####        |
| 9.98E-16 | 8.83E-14 | down | 16098715 | 16101701 | + | 2987 | otein_codi | --           |
| 1.97E-07 | 3.54E-06 | down | 14436578 | 14442569 | - | 5992 | otein_codi | --           |
| 0.000939 | 0.005662 | down | 308056   | 312351   | - | 4296 | otein_codi | #####        |
| 0.007897 | 0.032643 | down | 6297629  | 6301961  | - | 4333 | otein_codi | )3676,nuclo  |
| 1.81E-05 | 0.000192 | down | 1949469  | 1953549  | - | 4081 | otein_codi | ion bindin   |
| 1.78E-12 | 8.86E-11 | down | 38826102 | 38828102 | + | 2001 | otein_codi | )3676,nuclo  |
| 1.34E-10 | 4.73E-09 | down | 19211521 | 19214935 | + | 3415 | otein_codi | --           |
| 3.03E-15 | 2.44E-13 | down | 36370291 | 36373374 | + | 3084 | otein_codi | --           |
| 0.001358 | 0.007693 | up   | 1.39E+08 | 1.39E+08 | - | 2749 | otein_codi | )0050832,    |
| 1.74E-06 | 2.48E-05 | up   | 4475182  | 4475634  | + | 453  | otein_codi | #####        |
| 0.000195 | 0.00149  | up   | 39680722 | 39683697 | + | 2976 | otein_codi | #####        |
| 0.000635 | 0.004072 | up   | 55242115 | 55244427 | - | 2313 | otein_codi | --           |
| 0.000286 | 0.002069 | down | 1940180  | 1941614  | - | 1435 | otein_codi | 6872,metal   |
| 4.16E-06 | 5.32E-05 | up   | 1831923  | 1836173  | - | 4251 | otein_codi | --           |
| 0.000295 | 0.002127 | up   | 1.36E+08 | 1.36E+08 | - | 2749 | otein_codi | )0050832,    |
| 1.61E-05 | 0.000173 | up   | 1.09E+08 | 1.09E+08 | + | 1290 | otein_codi | ription regi |
| 4E-08    | 8.51E-07 | down | 5628184  | 5629458  | - | 1275 | otein_codi | --           |
| 0.010626 | 0.041372 | up   | 28443351 | 28446318 | + | 2968 | otein_codi | #####        |
| 3.48E-11 | 1.39E-09 | down | 13845532 | 13849074 | - | 3543 | otein_codi | #####        |
| 0.004172 | 0.019397 | up   | 2539040  | 2544526  | - | 5487 | otein_codi | --           |
| 5.67E-07 | 9.13E-06 | down | 31890449 | 31897536 | - | 7088 | otein_codi | --           |
| 0.000447 | 0.003021 | up   | 1.16E+08 | 1.16E+08 | - | 765  | otein_codi | #####        |
| 0.000433 | 0.002943 | down | 1.53E+08 | 1.53E+08 | + | 2399 | otein_codi | --           |

|          |          |      |          |          |   |      |                           |
|----------|----------|------|----------|----------|---|------|---------------------------|
| 6.16E-06 | 7.53E-05 | up   | 1.12E+08 | 1.13E+08 | + | 2012 | otin_codicoenzyme         |
| 9.24E-11 | 3.39E-09 | up   | 2797539  | 2798573  | - | 1035 | otin_codisequence-        |
| 0.009955 | 0.039228 | down | 30492671 | 30496583 | - | 3913 | otin_codid3676,nuc        |
| 2.37E-05 | 0.000242 | down | 3639475  | 3640880  | - | 1406 | otin_codid6872,metal      |
| 1.63E-12 | 8.17E-11 | up   | 769563   | 770594   | - | 1032 | otin_codisequence-        |
| 4.52E-06 | 5.73E-05 | down | 25888    | 30615    | - | 4728 | otin_codid#####           |
| 1.7E-05  | 0.000182 | up   | 10784823 | 10787530 | - | 2708 | otin_coding; GO:00        |
| 0.004146 | 0.019306 | up   | 10216950 | 10219734 | + | 2785 | otin_coding; GO:00        |
| 0.000277 | 0.002014 | up   | 44775660 | 44779253 | + | 3594 | otin_coding; GO:0016      |
| 2.48E-06 | 3.39E-05 | down | 1.11E+08 | 1.11E+08 | - | 5470 | otin_codiquence-spe       |
| 0.004441 | 0.020406 | down | 1.31E+08 | 1.31E+08 | + | 4340 | otin_codid GO:00082       |
| 2.09E-08 | 4.74E-07 | down | 6502804  | 6505328  | + | 2525 | otin_codid#####           |
| 3.32E-08 | 7.21E-07 | down | 8037706  | 8040125  | - | 2420 | otin_codid#####           |
| 7.65E-16 | 7E-14    | down | 98195774 | 98198020 | - | 2247 | otin_codid4722,prote      |
| 0.011788 | 0.044879 | down | 92793864 | 92797880 | + | 4017 | otin_codid#####           |
| 1.45E-05 | 0.000158 | down | 1.15E+08 | 1.15E+08 | - | 3900 | otin_codid#####           |
| 1.91E-05 | 0.000201 | down | 1.08E+08 | 1.08E+08 | - | 6593 | otin_codid#####           |
| 0.01235  | 0.0465   | up   | 12569757 | 12573885 | - | 4129 | otin_coding; GO:00        |
| 8.29E-06 | 9.77E-05 | down | 8827407  | 8830701  | - | 3295 | otin_codid#####           |
| 0.00134  | 0.007608 | down | 15453744 | 15457394 | - | 3651 | otin_codid#####           |
| 0.002555 | 0.012903 | down | 1.43E+08 | 1.43E+08 | - | 4045 | otin_codid --             |
| 2.26E-13 | 1.37E-11 | down | 1.34E+08 | 1.34E+08 | - | 4371 | otin_codid#####           |
| 0.00063  | 0.004046 | down | 9107010  | 9109715  | - | 2706 | otin_codid#####           |
| 2.66E-17 | 3.04E-15 | down | 22144006 | 22150585 | - | 6580 | otin_coding; GO:          |
| 0.000446 | 0.003015 | down | 46499782 | 46503091 | + | 3310 | otin_codid#####           |
| 5.22E-08 | 1.08E-06 | up   | 45174022 | 45178877 | + | 4856 | otin_codid#####           |
| 0.000599 | 0.003881 | down | 1.42E+08 | 1.42E+08 | - | 2436 | otin_coding; GO:          |
| 2.33E-05 | 0.000239 | down | 13788950 | 13796185 | + | 7236 | otin_codid#####           |
| 3.93E-06 | 5.06E-05 | down | 17739900 | 17742125 | + | 2226 | otin_codid --             |
| 3.79E-05 | 0.000366 | down | 1.21E+08 | 1.21E+08 | + | 3307 | otin_codid#####           |
| 0.000955 | 0.005742 | down | 1958340  | 1961734  | + | 3395 | otin_coding; GO:          |
| 2.06E-08 | 4.68E-07 | down | 1.17E+08 | 1.17E+08 | + | 3605 | otin_codid#####           |
| 2.81E-08 | 6.18E-07 | down | 1.31E+08 | 1.31E+08 | - | 4279 | otin_codid#####           |
| 1.8E-06  | 2.55E-05 | down | 23387292 | 23394293 | - | 7002 | otin_coding; GO:          |
| 3.71E-07 | 6.22E-06 | down | 12936061 | 12938928 | - | 2868 | otin_coding; GO:          |
| 0.009709 | 0.03847  | down | 30468900 | 30475430 | - | 6531 | otin_coding activity; C   |
| 1.29E-09 | 3.82E-08 | up   | 1.08E+08 | 1.08E+08 | + | 4884 | otin_coding; GO:          |
| 2.4E-15  | 1.99E-13 | down | 8958328  | 8961007  | - | 2680 | otin_codid#####           |
| 4.3E-07  | 7.09E-06 | up   | 62367968 | 62374717 | - | 6750 | otin_codid#####           |
| 9.06E-07 | 1.37E-05 | down | 1.1E+08  | 1.1E+08  | - | 3260 | otin_codid#####           |
| 1.2E-08  | 2.85E-07 | down | 61353233 | 61355956 | - | 2724 | otin_coding; GO:          |
| 1.09E-11 | 4.74E-10 | down | 1.2E+08  | 1.2E+08  | + | 2385 | otin_coding; GO:          |
| 0.000198 | 0.001513 | up   | 27004271 | 27006505 | + | 2235 | otin_coding; transferring |
| 0.000373 | 0.002593 | up   | 32533953 | 32536120 | - | 2168 | otin_coding; transferring |
| 0.007666 | 0.031919 | up   | 20486710 | 20488909 | + | 2200 | otin_coding; transferring |

|          |          |      |          |          |   |       |               |              |
|----------|----------|------|----------|----------|---|-------|---------------|--------------|
| 1.4E-06  | 2.03E-05 | down | 8708407  | 8714694  | - | 6288  | otein_codi    | --           |
| 0.003588 | 0.017162 | down | 10952304 | 10958588 | + | 6285  | otein_codi    | --           |
| 0.00123  | 0.007077 | up   | 581013   | 585578   | - | 4566  | otein_codi    | #####        |
| 0.009596 | 0.038128 | up   | 4303653  | 4304186  | - | 534   | otein_codi    | --           |
| 0.000274 | 0.001999 | down | 50073906 | 50077062 | + | 3157  | otein_codi    | pha-N-ace    |
| 0.000799 | 0.004949 | down | 1.01E+08 | 1.01E+08 | - | 1770  | otein_codi    | --           |
| 5.23E-11 | 2.02E-09 | up   | 575942   | 579664   | - | 3723  | otein_codi    | #####        |
| 2.94E-08 | 6.47E-07 | up   | 21632110 | 21634325 | + | 2216  | otein_codi    | transferring |
| 0.000466 | 0.003127 | up   | 116257   | 123762   | + | 7506  | otein_codi    | --           |
| 0.00795  | 0.032815 | down | 4816404  | 4824408  | + | 8005  | otein_codi    | #####        |
| 2.48E-09 | 6.91E-08 | down | 3263051  | 3265528  | - | 2478  | otein_codi    | #####        |
| 6.17E-06 | 7.54E-05 | down | 7826889  | 7828253  | - | 1365  | otein_codi    | #####        |
| 0.000262 | 0.001923 | down | 147397   | 149022   | - | 1626  | otein_codi    | #####        |
| 0.000331 | 0.002337 | up   | 12169861 | 12172516 | + | 2656  | otein_codi    | secondary    |
| 0.011549 | 0.044128 | down | 46790359 | 46794126 | - | 3768  | otein_codi    | O:000635     |
| 3.18E-07 | 5.44E-06 | down | 1.49E+08 | 1.49E+08 | - | 3197  | otein_codi    | --           |
| 0.001084 | 0.006381 | down | 1.51E+08 | 1.51E+08 | + | 5450  | otein_codi    | O:000635     |
| 0.001577 | 0.008706 | down | 94207648 | 94209012 | + | 1365  | otein_codi    | 0006355,r    |
| 0.000132 | 0.001072 | down | 2029296  | 2033171  | + | 3876  | otein_codi    | --           |
| 0.004504 | 0.020639 | down | 94527988 | 94531175 | + | 3188  | otein_codi    | 0006355,r    |
| 1.08E-11 | 4.69E-10 | down | 82327575 | 82333852 | + | 6278  | otein_codi    | --           |
| 0.000185 | 0.001427 | down | 66975934 | 66979061 | + | 3128  | otein_codi    | 0006355,r    |
| 0.008482 | 0.034537 | down | 73424708 | 73427845 | + | 3138  | otein_codi    | --           |
| 0.007682 | 0.031953 | down | 1.34E+08 | 1.34E+08 | + | 2472  | otein_codi    | #####        |
| 0.007113 | 0.029997 | up   | 941244   | 954746   | - | 13503 | otein_codi    | tion factor  |
| 2.95E-05 | 0.000294 | down | 1.5E+08  | 1.5E+08  | + | 2650  | otein_codi    | #####        |
| 0.011612 | 0.044345 | up   | 9611305  | 9619259  | - | 7955  | otein_codi    | tion factor  |
| 4.45E-09 | 1.16E-07 | down | 1.35E+08 | 1.35E+08 | - | 2991  | otein_codi    | #####        |
| 0.000897 | 0.005444 | down | 10820050 | 10825762 | - | 5713  | otein_codi    | #####        |
| 1.74E-07 | 3.18E-06 | down | 10604528 | 10613994 | - | 9467  | otein_codi    | #####        |
| 0.00564  | 0.024814 | up   | 1.12E+08 | 1.12E+08 | + | 2533  | otein_codi    | #####        |
| 0.000213 | 0.001612 | down | 1.33E+08 | 1.33E+08 | - | 3024  | otein_codi    | actor activi |
| 0.000463 | 0.003111 | down | 3398867  | 3415263  | - | 16397 | otein_coding; | GO:00C       |
| 0.002602 | 0.013097 | down | 6708903  | 6712861  | - | 3959  | otein_codi    | GO:00435     |
| 1.84E-07 | 3.34E-06 | down | 9330083  | 9335812  | - | 5730  | otein_codi    | #####        |
| 4.35E-06 | 5.53E-05 | down | 80004185 | 80013368 | + | 9184  | otein_coding; | GO:00C       |
| 0.000231 | 0.001726 | up   | 23515920 | 23519166 | + | 3247  | otein_codi    | #####        |
| 0.00051  | 0.003376 | up   | 1.34E+08 | 1.34E+08 | - | 1453  | otein_codi    | #####        |
| 0.000102 | 0.000858 | up   | 1406454  | 1412047  | + | 5594  | otein_coding; | GO:00C       |
| 0.000179 | 0.001386 | down | 11222360 | 11226390 | + | 4031  | otein_codi    | #####        |
| 1.18E-09 | 3.55E-08 | up   | 28511187 | 28514592 | + | 3406  | otein_codi    | #####        |
| 0.000411 | 0.002819 | up   | 1.06E+08 | 1.06E+08 | + | 2842  | otein_codi    | #####        |
| 0.002754 | 0.013751 | down | 1.58E+08 | 1.58E+08 | + | 6020  | otein_codi    | #####        |
| 0.001153 | 0.006707 | down | 17934161 | 17944438 | - | 10278 | otein_codi    | #####        |
| 2.55E-05 | 0.000258 | down | 13223949 | 13226054 | + | 2106  | otein_codi    | GO:00435     |

|          |          |      |          |          |   |       |                         |
|----------|----------|------|----------|----------|---|-------|-------------------------|
| 0.009058 | 0.0364   | down | 18180851 | 18185115 | + | 4265  | otein_codi #####        |
| 1.89E-06 | 2.67E-05 | up   | 1.22E+08 | 1.22E+08 | - | 6310  | otein_codi #####        |
| 7.1E-25  | 2.37E-22 | down | 1.37E+08 | 1.37E+08 | - | 2287  | otein_codi #####        |
| 0.006374 | 0.027374 | up   | 16020676 | 16023743 | + | 3068  | otein_codi #####        |
| 3.2E-05  | 0.000315 | up   | 12959989 | 12964723 | - | 4735  | otein_codi; GO:000      |
| 0.004371 | 0.02015  | up   | 5926202  | 5931136  | + | 4935  | otein_codi55,regulatio  |
| 0.003879 | 0.01826  | down | 1.35E+08 | 1.35E+08 | - | 7975  | otein_codi; GO:004      |
| 1.53E-09 | 4.48E-08 | down | 1.37E+08 | 1.37E+08 | + | 3503  | otein_codi55,regulatio  |
| 1.43E-09 | 4.21E-08 | down | 25202366 | 25211803 | + | 9438  | otein_codiA binding;    |
| 5.87E-07 | 9.42E-06 | down | 1.04E+08 | 1.04E+08 | - | 4518  | otein_codi55,regulatio  |
| 7.32E-21 | 1.4E-18  | down | 10386016 | 10388380 | + | 2365  | otein_codiquence-spec   |
| 0.000145 | 0.001156 | up   | 62517680 | 62523385 | + | 5706  | otein_codi --           |
| 1.03E-39 | 1.58E-36 | down | 10002573 | 10004649 | + | 2077  | otein_codiquence-spec   |
| 0.000796 | 0.004929 | up   | 1.03E+08 | 1.03E+08 | - | 1765  | otein_codiment; GO:C    |
| 2.85E-09 | 7.81E-08 | up   | 12198899 | 12200929 | + | 2031  | otein_codi #####        |
| 0.000215 | 0.001622 | down | 38198063 | 38201854 | + | 3792  | otein_coditranscriptio  |
| 2.15E-06 | 2.99E-05 | down | 39570818 | 39574606 | + | 3789  | otein_coditranscriptio  |
| 1.32E-06 | 1.93E-05 | up   | 89060053 | 89063439 | - | 3387  | otein_codi --           |
| 1.1E-12  | 5.74E-11 | down | 1.02E+08 | 1.02E+08 | - | 2436  | otein_coding; GO:000    |
| 2.3E-10  | 7.83E-09 | down | 1.53E+08 | 1.53E+08 | - | 1968  | otein_codi; transcripti |
| 1.61E-12 | 8.09E-11 | down | 1.01E+08 | 1.01E+08 | - | 2443  | otein_coding; GO:000    |
| 1.43E-12 | 7.34E-11 | down | 1.15E+08 | 1.15E+08 | + | 5290  | otein_codi; transcripti |
| 6.39E-15 | 4.89E-13 | down | 1915150  | 1918222  | - | 3073  | otein_coditor activity  |
| 1.05E-10 | 3.8E-09  | down | 1.2E+08  | 1.2E+08  | - | 2266  | otein_codi3565,sequ     |
| 9.32E-10 | 2.85E-08 | down | 11553957 | 11557132 | + | 3176  | otein_codi3565,sequ     |
| 0.001409 | 0.007938 | up   | 8725520  | 8728456  | + | 2937  | otein_codiGO:004356     |
| 9.79E-22 | 2.12E-19 | down | 16708931 | 16713269 | + | 4339  | otein_coditor activity  |
| 0.000284 | 0.002061 | up   | 1.33E+08 | 1.33E+08 | - | 2580  | otein_codiGO:004356     |
| 9.41E-07 | 1.42E-05 | down | 1.49E+08 | 1.49E+08 | + | 3836  | otein_codiGO:004356     |
| 3.7E-07  | 6.2E-06  | down | 6531489  | 6533729  | - | 2241  | otein_codi --           |
| 0.000114 | 0.000946 | up   | 8528588  | 8531230  | + | 2643  | otein_codiGO:004356     |
| 0.01163  | 0.044391 | down | 1.38E+08 | 1.38E+08 | - | 4628  | otein_codiation of tra  |
| 0.000967 | 0.005802 | down | 1.12E+08 | 1.12E+08 | - | 4597  | otein_codiation of tra  |
| 0.000857 | 0.005234 | down | 1.39E+08 | 1.39E+08 | + | 20760 | otein_codi #####        |
| 0.006168 | 0.026651 | up   | 13308462 | 13318245 | + | 9784  | otein_codi005829,cy     |
| 5.04E-06 | 6.32E-05 | down | 1.15E+08 | 1.15E+08 | + | 7348  | otein_codi #####        |
| 0.010616 | 0.041334 | up   | 1.3E+08  | 1.3E+08  | + | 9149  | otein_codi005829,cy     |
| 6.01E-09 | 1.53E-07 | down | 88945004 | 88946814 | - | 1811  | otein_codiment bindin   |
| 0.006052 | 0.026243 | down | 1.15E+08 | 1.15E+08 | + | 2445  | otein_codi:0046872,r    |
| 1.95E-05 | 0.000205 | up   | 1.06E+08 | 1.06E+08 | - | 2943  | otein_codi005634,nu     |
| 0.005789 | 0.025328 | up   | 8916998  | 8919601  | + | 2604  | otein_codi,proximal/c   |
| 0.003927 | 0.018458 | down | 29281618 | 29282856 | - | 1239  | otein_codimorphogen     |
| 0.002157 | 0.011266 | down | 7122328  | 7124934  | + | 2607  | otein_codi --           |
| 0.001841 | 0.009914 | up   | 9060910  | 9063536  | + | 2627  | otein_codi,proximal/c   |
| 0.000393 | 0.002709 | down | 1.31E+08 | 1.31E+08 | - | 6531  | otein_codi7,tyrosine c  |

|          |          |      |          |          |   |      |            |              |
|----------|----------|------|----------|----------|---|------|------------|--------------|
| 0.012845 | 0.047975 | down | 1.56E+08 | 1.56E+08 | - | 1035 | otein_codi | --           |
| 1.79E-05 | 0.000191 | down | 1.55E+08 | 1.55E+08 | - | 1237 | otein_codi | --           |
| 0.000501 | 0.003323 | down | 204458   | 207567   | + | 3110 | otein_codi | --           |
| 1.53E-07 | 2.84E-06 | down | 20212508 | 20213725 | + | 1218 | otein_codi | morphogen    |
| 1.6E-05  | 0.000173 | up   | 84538047 | 84541033 | - | 2987 | otein_codi | 0005634,nu   |
| 1.18E-05 | 0.000133 | down | 32224485 | 32227800 | - | 3316 | otein_codi | --           |
| 0.009685 | 0.038401 | down | 7152505  | 7155115  | + | 2611 | otein_codi | --           |
| 2.84E-09 | 7.77E-08 | up   | 1.09E+08 | 1.09E+08 | - | 6845 | otein_codi | #####        |
| 3.07E-08 | 6.73E-07 | up   | 65288000 | 65297803 | + | 9804 | otein_codi | #####        |
| 0.000154 | 0.001224 | up   | 12284902 | 12287618 | + | 2717 | otein_codi | #####        |
| 3.22E-15 | 2.58E-13 | up   | 1.05E+08 | 1.05E+08 | - | 8991 | otein_codi | #####        |
| 1.36E-08 | 3.22E-07 | up   | 1.12E+08 | 1.12E+08 | - | 4962 | otein_codi | #####        |
| 0.002417 | 0.01236  | up   | 11638128 | 11640646 | + | 2519 | otein_codi | --           |
| 2.99E-08 | 6.55E-07 | up   | 1646001  | 1651342  | + | 5342 | otein_codi | #####        |
| 5.15E-06 | 6.45E-05 | up   | 1799893  | 1808791  | + | 8899 | otein_codi | #####        |
| 2.38E-16 | 2.36E-14 | up   | 1.29E+08 | 1.29E+08 | - | 9512 | otein_codi | #####        |
| 3.78E-07 | 6.31E-06 | up   | 38848556 | 38857698 | - | 9143 | otein_codi | #####        |
| 0.001956 | 0.010404 | up   | 1.31E+08 | 1.31E+08 | + | 801  | otein_codi | #####        |
| 5.5E-13  | 3.08E-11 | down | 1.38E+08 | 1.38E+08 | + | 4241 | otein_codi | #####        |
| 0.001757 | 0.009537 | down | 1.35E+08 | 1.35E+08 | + | 4148 | otein_codi | #####        |
| 0.000242 | 0.001799 | up   | 1.34E+08 | 1.34E+08 | + | 5374 | otein_codi | #####        |
| 3.26E-05 | 0.00032  | up   | 35417334 | 35419361 | + | 2028 | otein_codi | tion coacti  |
| 4.5E-05  | 0.000425 | up   | 13946592 | 13948645 | + | 2054 | otein_codi | tion coacti  |
| 0.000541 | 0.003555 | down | 1.02E+08 | 1.02E+08 | + | 1457 | otein_codi | --           |
| 0.002007 | 0.01062  | down | 2870764  | 2873810  | + | 3047 | otein_codi | #####        |
| 0.003752 | 0.017774 | down | 1.02E+08 | 1.02E+08 | + | 1533 | otein_codi | --           |
| 0.002052 | 0.010807 | down | 1.42E+08 | 1.42E+08 | - | 7483 | otein_codi | #####        |
| 0.010515 | 0.041046 | down | 1.15E+08 | 1.15E+08 | - | 7927 | otein_codi | #####        |
| 1.33E-22 | 3.25E-20 | down | 1.15E+08 | 1.15E+08 | - | 3694 | otein_codi | #####        |
| 9.09E-06 | 0.000106 | down | 1.14E+08 | 1.14E+08 | + | 1647 | otein_codi | 908,flowe    |
| 1.7E-18  | 2.34E-16 | down | 1.2E+08  | 1.2E+08  | - | 2136 | otein_codi | tion of tran |
| 4.07E-10 | 1.33E-08 | down | 1.18E+08 | 1.18E+08 | - | 1945 | otein_codi | tion of tran |
| 0.001656 | 0.009077 | down | 41125125 | 41127474 | + | 2350 | otein_codi | #####        |
| 8.53E-09 | 2.08E-07 | down | 1.27E+08 | 1.27E+08 | - | 3672 | otein_codi | #####        |
| 0.012409 | 0.046682 | down | 80764051 | 80766649 | - | 2599 | otein_codi | #####        |
| 5.1E-05  | 0.000475 | down | 1.18E+08 | 1.18E+08 | + | 2670 | otein_codi | #####        |
| 4.82E-09 | 1.25E-07 | down | 1.42E+08 | 1.42E+08 | - | 5779 | otein_codi | #####        |
| 0.007678 | 0.031945 | down | 1.52E+08 | 1.52E+08 | + | 8241 | otein_codi | #####        |
| 3.91E-20 | 6.84E-18 | down | 93590774 | 93591823 | - | 1050 | otein_codi | #####        |
| 0.000169 | 0.001322 | down | 1.43E+08 | 1.43E+08 | + | 3876 | otein_codi | #####        |
| 0.000598 | 0.003877 | down | 1.08E+08 | 1.08E+08 | - | 1170 | otein_codi | #####        |
| 0.000895 | 0.005437 | down | 1.54E+08 | 1.54E+08 | - | 1047 | otein_codi | 908,flowe    |
| 0.000295 | 0.002124 | down | 27591815 | 27593754 | + | 1940 | otein_codi | #####        |
| 0.001292 | 0.007382 | down | 5815913  | 5818751  | - | 2839 | otein_codi | 908,flowe    |
| 1.74E-07 | 3.18E-06 | down | 12768999 | 12772687 | - | 3689 | otein_codi | #####        |



|          |          |      |          |          |   |      |            |              |
|----------|----------|------|----------|----------|---|------|------------|--------------|
| 3.22E-06 | 4.25E-05 | up   | 62253875 | 62256359 | - | 2485 | otein_codi | tion of tran |
| 5.74E-05 | 0.000525 | down | 1.09E+08 | 1.09E+08 | - | 5102 | otein_codi | #####        |
| 0.003998 | 0.018746 | up   | 23094264 | 23095496 | - | 1233 | otein_codi | #####        |
| 0.013164 | 0.048906 | down | 1.38E+08 | 1.38E+08 | + | 1993 | otein_codi | #####        |
| 4.76E-08 | 9.93E-07 | down | 1.45E+08 | 1.45E+08 | - | 5814 | otein_codi | #####        |
| 3.67E-21 | 7.44E-19 | down | 7865058  | 7869082  | + | 4025 | otein_codi | #####        |
| 6E-05    | 0.000546 | down | 44870931 | 44872647 | - | 1717 | otein_codi | #####        |
| 8.75E-05 | 0.000756 | up   | 1.01E+08 | 1.01E+08 | - | 6378 | otein_codi | --           |
| 0.000703 | 0.004434 | up   | 23244594 | 23245784 | + | 1191 | otein_codi | #####        |
| 1.38E-12 | 7.07E-11 | down | 14366426 | 14368800 | + | 2375 | otein_codi | #####        |
| 8.59E-35 | 8.27E-32 | down | 38100937 | 38102756 | + | 1820 | otein_codi | #####        |
| 0.000452 | 0.003051 | down | 5463585  | 5465926  | + | 2342 | otein_codi | 908,flowe    |
| 7.68E-08 | 1.52E-06 | down | 45929006 | 45930796 | + | 1791 | otein_codi | #####        |
| 3.61E-05 | 0.000351 | up   | 1.43E+08 | 1.43E+08 | + | 6327 | otein_codi | --           |
| 1.12E-05 | 0.000127 | down | 16645741 | 16649216 | - | 3476 | otein_codi | tion of tran |
| 0.000442 | 0.002989 | down | 12625312 | 12628611 | - | 3300 | otein_codi | tion of tran |
| 8.07E-05 | 0.000705 | up   | 16917107 | 16923273 | - | 6167 | otein_codi | #####        |
| 3.05E-36 | 3.32E-33 | down | 6615480  | 6618446  | - | 2967 | otein_codi | #####        |
| 6.89E-05 | 0.000615 | up   | 15609871 | 15612810 | - | 2940 | otein_codi | #####        |
| 0.008528 | 0.034692 | up   | 23278956 | 23280030 | - | 1075 | otein_codi | #####        |
| 2.33E-08 | 5.22E-07 | down | 1.16E+08 | 1.16E+08 | + | 3891 | otein_codi | #####        |
| 0.000656 | 0.004181 | down | 1.02E+08 | 1.02E+08 | - | 6434 | otein_codi | #####        |
| 0.000252 | 0.001861 | down | 47848801 | 47856094 | + | 7294 | otein_codi | --           |
| 0.000126 | 0.001028 | down | 4808088  | 4813520  | + | 5433 | otein_codi | gulation of  |
| 2.93E-24 | 9.18E-22 | up   | 7287112  | 7288301  | + | 1190 | otein_codi | #####        |
| 8.53E-05 | 0.00074  | up   | 16931722 | 16934390 | - | 2669 | otein_codi | #####        |
| 0.000294 | 0.002119 | up   | 526667   | 529908   | - | 3242 | otein_codi | --           |
| 0.002308 | 0.011905 | down | 2203454  | 2204614  | + | 1161 | otein_codi | --           |
| 0.000227 | 0.001702 | down | 1.39E+08 | 1.39E+08 | + | 1259 | otein_codi | 908,flowe    |
| 3.67E-08 | 7.89E-07 | down | 52861516 | 52863722 | - | 2207 | otein_codi | #####        |
| 2.09E-06 | 2.92E-05 | down | 67678432 | 67679326 | - | 895  | otein_codi | 908,flowe    |
| 0.004944 | 0.022293 | up   | 1.33E+08 | 1.33E+08 | - | 2203 | otein_codi | --           |
| 0.000904 | 0.005482 | down | 95665788 | 95672357 | + | 6570 | otein_codi | #####        |
| 0.00224  | 0.01162  | down | 80574479 | 80575667 | + | 1189 | otein_codi | #####        |
| 8.02E-22 | 1.79E-19 | down | 1.09E+08 | 1.09E+08 | + | 3870 | otein_codi | #####        |
| 0.001002 | 0.005976 | down | 3491553  | 3493730  | + | 2178 | otein_codi | #####        |
| 2.88E-09 | 7.86E-08 | down | 94234410 | 94235777 | + | 1368 | otein_codi | --           |
| 0.000432 | 0.002938 | down | 1.33E+08 | 1.33E+08 | - | 1249 | otein_codi | #####        |
| 8.51E-07 | 1.3E-05  | down | 43058362 | 43061924 | + | 3563 | otein_codi | --           |
| 0.008963 | 0.036084 | down | 82913170 | 82914050 | - | 881  | otein_codi | 908,flowe    |
| 1.97E-14 | 1.38E-12 | up   | 13525720 | 13526988 | - | 1269 | otein_codi | #####        |
| 0.011815 | 0.044958 | up   | 31176464 | 31179007 | + | 2544 | otein_codi | #####        |
| 6.85E-14 | 4.5E-12  | down | 32090209 | 32092077 | - | 1869 | otein_codi | #####        |
| 3.43E-10 | 1.13E-08 | down | 1450704  | 1453091  | + | 2388 | otein_codi | #####        |
| 1.07E-05 | 0.000122 | down | 4436627  | 4437994  | - | 1368 | otein_codi | --           |

|          |          |      |          |          |   |      |            |              |
|----------|----------|------|----------|----------|---|------|------------|--------------|
| 7.26E-05 | 0.000643 | down | 38237400 | 38241219 | + | 3820 | otein_codi | --           |
| 1.21E-07 | 2.31E-06 | down | 1.49E+08 | 1.49E+08 | - | 1673 | otein_codi | --           |
| 8.15E-05 | 0.000711 | down | 1.02E+08 | 1.02E+08 | + | 5397 | otein_codi | --           |
| 6.37E-05 | 0.000575 | down | 43481655 | 43486858 | + | 5204 | otein_codi | --           |
| 0.007996 | 0.032967 | up   | 12466711 | 12469987 | + | 3277 | otein_codi | --           |
| 1.65E-07 | 3.03E-06 | down | 14207391 | 14211790 | - | 4400 | otein_codi | #####        |
| 1.47E-62 | 1.01E-58 | down | 18197461 | 18202695 | - | 5235 | otein_codi | #####        |
| 0.000436 | 0.002961 | down | 16884846 | 16886968 | - | 2123 | otein_codi | #####        |
| 0.002975 | 0.014642 | down | 53546421 | 53550826 | - | 4406 | otein_codi | #####        |
| 7.07E-06 | 8.53E-05 | up   | 19289698 | 19296599 | - | 6902 | otein_codi | #####        |
| 1.19E-05 | 0.000133 | up   | 1.01E+08 | 1.01E+08 | - | 1720 | otein_codi | #####        |
| 0.001884 | 0.010094 | down | 18202760 | 18208274 | + | 5515 | otein_codi | 0090603,si   |
| 7.04E-07 | 1.11E-05 | up   | 35134951 | 35138007 | - | 3057 | otein_codi | ding; GO:(   |
| 0.002245 | 0.011639 | up   | 99254525 | 99259219 | - | 4695 | otein_codi | #####        |
| 2.95E-06 | 3.94E-05 | up   | 210008   | 211705   | + | 1698 | otein_codi | binding tr   |
| 0.002413 | 0.012344 | up   | 1.56E+08 | 1.56E+08 | - | 1917 | otein_codi | #####        |
| 0.002006 | 0.010619 | up   | 1.26E+08 | 1.26E+08 | - | 2316 | otein_codi | 003700,DN    |
| 1E-09    | 3.04E-08 | up   | 6544944  | 6546522  | + | 1579 | otein_codi | binding tr   |
| 0.000156 | 0.001236 | up   | 5793583  | 5797056  | + | 3474 | otein_codi | ding; GO:(   |
| 0.005842 | 0.025516 | up   | 1.24E+08 | 1.24E+08 | + | 1932 | otein_codi | binding tr   |
| 2.19E-05 | 0.000226 | up   | 1.32E+08 | 1.32E+08 | - | 1828 | otein_codi | #####        |
| 6.47E-05 | 0.000582 | up   | 14868225 | 14874967 | - | 6743 | otein_codi | #####        |
| 0.002293 | 0.011844 | down | 11907903 | 11910313 | + | 2411 | otein_codi | #####        |
| 0.000258 | 0.001898 | down | 1.38E+08 | 1.38E+08 | - | 1456 | otein_codi | #####        |
| 4.16E-11 | 1.64E-09 | up   | 40056890 | 40059540 | - | 2651 | otein_codi | #####        |
| 0.00529  | 0.023522 | down | 34472678 | 34475068 | + | 2391 | otein_codi | #####        |
| 1.09E-11 | 4.74E-10 | down | 6621922  | 6624293  | + | 2372 | otein_codi | #####        |
| 5.95E-17 | 6.41E-15 | down | 30826824 | 30829116 | + | 2293 | otein_codi | #####        |
| 1.02E-06 | 1.53E-05 | up   | 1.3E+08  | 1.3E+08  | - | 1904 | otein_codi | tivity; GO:  |
| 0.010249 | 0.040175 | up   | 1217685  | 1221909  | - | 4225 | otein_codi | #####        |
| 0.001782 | 0.00966  | down | 1.31E+08 | 1.31E+08 | + | 4929 | otein_codi | #####        |
| 0.008648 | 0.035072 | down | 1.48E+08 | 1.48E+08 | + | 3123 | otein_codi | --           |
| 0.003001 | 0.014747 | down | 1.37E+08 | 1.37E+08 | + | 4175 | otein_codi | #####        |
| 5.92E-05 | 0.000539 | down | 1.05E+08 | 1.05E+08 | + | 4484 | otein_codi | #####        |
| 3.29E-09 | 8.83E-08 | up   | 51200843 | 51202462 | - | 1620 | otein_codi | binding tr   |
| 0.002416 | 0.012354 | down | 29651468 | 29653481 | - | 2014 | otein_codi | tion of tran |
| 2.09E-06 | 2.92E-05 | up   | 1.27E+08 | 1.27E+08 | - | 2153 | otein_codi | tivity; GO:  |
| 3.75E-12 | 1.79E-10 | up   | 4143171  | 4146189  | - | 3019 | otein_codi | #####        |
| 0.003152 | 0.015379 | up   | 27133222 | 27134709 | - | 1488 | otein_codi | #####        |
| 2.46E-07 | 4.31E-06 | down | 1.35E+08 | 1.35E+08 | - | 1783 | otein_codi | #####        |
| 0.011306 | 0.043447 | down | 12184444 | 12184988 | + | 545  | otein_codi | #####        |
| 3.69E-06 | 4.81E-05 | down | 1.5E+08  | 1.5E+08  | + | 6316 | otein_codi | #####        |
| 0.012692 | 0.047523 | up   | 7810468  | 7813061  | + | 2594 | otein_codi | #####        |
| 0.01091  | 0.042237 | down | 95117452 | 95123223 | - | 5772 | otein_codi | #####        |
| 0.007372 | 0.030894 | down | 1.15E+08 | 1.15E+08 | - | 2574 | otein_codi | --           |

|          |          |      |          |          |   |       |            |              |
|----------|----------|------|----------|----------|---|-------|------------|--------------|
| 2.47E-05 | 0.000251 | up   | 2052797  | 2056222  | - | 3426  | otein_codi | #####        |
| 7.37E-05 | 0.000652 | up   | 26244149 | 26246859 | - | 2711  | otein_codi | #####        |
| 0.001004 | 0.005986 | down | 1.6E+08  | 1.6E+08  | - | 2561  | otein_codi | --           |
| 5.56E-06 | 6.88E-05 | down | 13979981 | 13983527 | + | 3547  | otein_codi | #####        |
| 0.000402 | 0.002759 | down | 1.18E+08 | 1.18E+08 | + | 5516  | otein_codi | --           |
| 0.000738 | 0.004617 | down | 1.11E+08 | 1.11E+08 | + | 4429  | otein_codi | 03700,DN     |
| 9.36E-09 | 2.27E-07 | down | 44492626 | 44498160 | - | 5535  | otein_codi | #####        |
| 0.002538 | 0.012835 | down | 47820230 | 47823687 | + | 3458  | otein_codi | 03700,DN     |
| 8.44E-14 | 5.49E-12 | down | 2248428  | 2249015  | - | 588   | otein_codi | rodimeriza   |
| 3.12E-21 | 6.42E-19 | down | 937559   | 938146   | - | 588   | otein_codi | #####        |
| 0.000176 | 0.001369 | up   | 1902649  | 1905985  | + | 3337  | otein_codi | #####        |
| 5.62E-15 | 4.36E-13 | up   | 5734442  | 5736074  | + | 1633  | otein_codi | #####        |
| 0.000478 | 0.003199 | up   | 7695567  | 7696286  | - | 720   | otein_codi | #####        |
| 0.002968 | 0.014617 | down | 7517931  | 7527681  | + | 9751  | otein_codi | --           |
| 4.44E-06 | 5.64E-05 | down | 93739927 | 93744144 | - | 4218  | otein_codi | #####        |
| 7.25E-07 | 1.13E-05 | down | 1.36E+08 | 1.36E+08 | - | 13173 | otein_codi | #####        |
| 1.54E-15 | 1.31E-13 | up   | 40162652 | 40169922 | + | 7271  | otein_codi | --           |
| 2.09E-08 | 4.75E-07 | down | 1.27E+08 | 1.27E+08 | + | 4078  | otein_codi | #####        |
| 0.005654 | 0.024865 | down | 13148836 | 13153824 | - | 4989  | otein_codi | ing; GO:00   |
| 6.7E-06  | 8.14E-05 | up   | 15818311 | 15825647 | - | 7337  | otein_codi | 372,metal i  |
| 0.011904 | 0.045241 | down | 1.34E+08 | 1.34E+08 | - | 4043  | otein_codi | #####        |
| 9.54E-05 | 0.000813 | down | 27787037 | 27788611 | - | 1575  | otein_codi | --           |
| 0.000336 | 0.00237  | down | 71136570 | 71140741 | - | 4172  | otein_codi | #####        |
| 6.73E-05 | 0.000603 | down | 1.42E+08 | 1.42E+08 | + | 1901  | otein_codi | #####        |
| 0.004088 | 0.019092 | up   | 1.44E+08 | 1.44E+08 | + | 680   | otein_codi | #####        |
| 0.002727 | 0.013646 | down | 1.4E+08  | 1.4E+08  | + | 3638  | otein_codi | #####        |
| 0.001014 | 0.006035 | up   | 3304701  | 3309586  | + | 4886  | otein_codi | #####        |
| 0.00099  | 0.005919 | up   | 18620545 | 18622801 | + | 2257  | otein_codi | #####        |
| 0.001453 | 0.00815  | up   | 1.19E+08 | 1.19E+08 | - | 10803 | otein_codi | #####        |
| 0.000581 | 0.00378  | up   | 1.39E+08 | 1.39E+08 | - | 6957  | otein_codi | #####        |
| 4.11E-05 | 0.000392 | down | 5747386  | 5747850  | - | 465   | otein_codi | #####        |
| 0.000366 | 0.00255  | down | 1.16E+08 | 1.16E+08 | + | 2221  | otein_codi | #####        |
| 0.000159 | 0.001252 | down | 93799802 | 93803387 | + | 3586  | otein_codi | #####        |
| 0.000627 | 0.004026 | up   | 9645882  | 9650415  | + | 4534  | otein_codi | 372,metal i  |
| 9.19E-05 | 0.000789 | down | 26048733 | 26052182 | + | 3450  | otein_codi | #####        |
| 0.000911 | 0.005517 | down | 9387555  | 9392191  | - | 4637  | otein_codi | 372,metal i  |
| 0.0002   | 0.001526 | down | 335515   | 336396   | + | 882   | otein_codi | --           |
| 0.00354  | 0.016967 | down | 95497914 | 95501972 | + | 4059  | otein_codi | targeting tc |
| 0.004941 | 0.022284 | up   | 928858   | 935835   | + | 6978  | otein_codi | 372,metal i  |
| 1.52E-17 | 1.8E-15  | up   | 44695266 | 44702013 | + | 6748  | otein_codi | --           |
| 0.000566 | 0.00369  | up   | 73447099 | 73451495 | - | 4397  | otein_codi | #####        |
| 0.000504 | 0.003341 | down | 30579673 | 30581450 | - | 1778  | otein_codi | #####        |
| 6.53E-12 | 2.97E-10 | down | 58560425 | 58568125 | - | 7701  | otein_codi | --           |
| 0.000155 | 0.001231 | down | 1.34E+08 | 1.34E+08 | + | 1878  | otein_codi | #####        |
| 0.000411 | 0.002818 | up   | 16416553 | 16430913 | + | 14361 | otein_codi | #####        |

|          |          |      |          |          |   |       |                         |
|----------|----------|------|----------|----------|---|-------|-------------------------|
| 6.52E-09 | 1.63E-07 | down | 6180823  | 6189771  | + | 8949  | otein_codi #####        |
| 1.37E-05 | 0.000151 | down | 16437662 | 16449973 | + | 12312 | otein_codi --           |
| 0.00168  | 0.00919  | down | 2529365  | 2535349  | + | 5985  | otein_codiase activity  |
| 0.00168  | 0.00919  | down | 2529365  | 2535349  | + | 5985  | otein_codiase activity  |
| 0.004087 | 0.019089 | down | 4795240  | 4803790  | - | 8551  | otein_codi #####        |
| 0.001544 | 0.008555 | down | 21580697 | 21590540 | + | 9844  | otein_codi --           |
| 1.11E-05 | 0.000125 | up   | 4730277  | 4737866  | - | 7590  | otein_codiase activity  |
| 0.008553 | 0.034767 | down | 23011889 | 23020296 | + | 8408  | otein_codi --           |
| 0.000242 | 0.001797 | down | 17919815 | 17923230 | + | 3416  | otein_codi --           |
| 7.51E-05 | 0.000663 | down | 1.31E+08 | 1.31E+08 | - | 11323 | otein_codi --           |
| 0.001945 | 0.010352 | down | 14098924 | 14102352 | + | 3429  | otein_codi --           |
| 0.002423 | 0.012381 | down | 5211828  | 5217047  | + | 5220  | otein_codi --           |
| 0.000959 | 0.005763 | down | 6554695  | 6560275  | + | 5581  | otein_codin of transci  |
| 5.87E-07 | 9.42E-06 | up   | 2371561  | 2377933  | - | 6373  | otein_codiactivity; GO  |
| 3.12E-09 | 8.42E-08 | up   | 3693746  | 3698439  | + | 4694  | otein_codi binding tr   |
| 1.6E-05  | 0.000173 | up   | 25739009 | 25745119 | - | 6111  | otein_codiactivity; GO  |
| 0.000841 | 0.005157 | down | 4014780  | 4019885  | + | 5106  | otein_codiactivity; GO  |
| 3.42E-07 | 5.79E-06 | up   | 1.04E+08 | 1.04E+08 | - | 4687  | otein_codi binding tr   |
| 8.59E-16 | 7.74E-14 | down | 1.28E+08 | 1.28E+08 | - | 1756  | otein_codi #####        |
| 7.22E-16 | 6.64E-14 | down | 1.31E+08 | 1.31E+08 | - | 1449  | otein_codi #####        |
| 1.44E-12 | 7.36E-11 | down | 1.42E+08 | 1.42E+08 | - | 3122  | otein_codi:0006355,r    |
| 0.00184  | 0.009914 | down | 7144333  | 7146328  | + | 1996  | otein_codi #####        |
| 1.51E-05 | 0.000164 | down | 34167632 | 34169023 | + | 1392  | otein_codi #####        |
| 3.17E-08 | 6.92E-07 | down | 1.02E+08 | 1.02E+08 | + | 3488  | otein_codi:0006355,r    |
| 6.94E-05 | 0.00062  | down | 2260932  | 2262478  | - | 1547  | otein_codi #####        |
| 0.005803 | 0.02538  | down | 2014080  | 2019587  | - | 5508  | otein_codi:0006355,r    |
| 4.5E-10  | 1.46E-08 | down | 1.45E+08 | 1.45E+08 | - | 3492  | otein_codi:0006355,r    |
| 0.009159 | 0.036726 | down | 11463762 | 11465084 | + | 1323  | otein_codi #####        |
| 5.67E-12 | 2.64E-10 | down | 1.13E+08 | 1.13E+08 | - | 3695  | otein_codi developme    |
| 6.26E-12 | 2.87E-10 | down | 1.16E+08 | 1.16E+08 | - | 3700  | otein_codi developme    |
| 3.28E-05 | 0.000322 | down | 1.07E+08 | 1.07E+08 | + | 3498  | otein_codiytransferas   |
| 0.006902 | 0.029226 | down | 1.47E+08 | 1.47E+08 | + | 6312  | otein_codinsferase ac   |
| 0.001021 | 0.006064 | down | 1.52E+08 | 1.52E+08 | - | 6368  | otein_codi #####        |
| 1.46E-18 | 2.01E-16 | down | 1.38E+08 | 1.38E+08 | + | 3717  | otein_codidisphosphat   |
| 0.00066  | 0.004203 | down | 21531845 | 21538172 | + | 6328  | otein_codi #####        |
| 4.14E-06 | 5.3E-05  | down | 17618334 | 17621271 | + | 2938  | otein_codiase activity; |
| 3.36E-06 | 4.42E-05 | down | 1.35E+08 | 1.35E+08 | + | 3418  | otein_codidisphosphat   |
| 5.48E-06 | 6.8E-05  | down | 1.27E+08 | 1.27E+08 | + | 4558  | otein_codi --           |
| 0.000456 | 0.003071 | down | 1.38E+08 | 1.38E+08 | - | 5993  | otein_codi; GO:0003     |
| 1.61E-08 | 3.74E-07 | down | 10707287 | 10712468 | + | 5182  | otein_codi #####        |
| 3.37E-07 | 5.72E-06 | down | 1.06E+08 | 1.06E+08 | - | 5710  | otein_codi; GO:0003     |
| 0.007052 | 0.029791 | down | 46994644 | 47001340 | - | 6697  | otein_codi003676,nuc    |
| 1.45E-06 | 2.1E-05  | down | 10265776 | 10270961 | + | 5186  | otein_codi #####        |
| 0.0001   | 0.000846 | down | 42355694 | 42362389 | + | 6696  | otein_codi003676,nuc    |
| 1.91E-08 | 4.38E-07 | down | 27861070 | 27863090 | - | 2021  | otein_codinding; GO:0   |

|          |          |      |          |          |   |       |                        |
|----------|----------|------|----------|----------|---|-------|------------------------|
| 0.000892 | 0.005422 | up   | 22909402 | 22915855 | + | 6454  | otein_codi77,DNA b     |
| 5.22E-06 | 6.52E-05 | up   | 1.22E+08 | 1.22E+08 | + | 5823  | otein_codi #####       |
| 2.86E-06 | 3.84E-05 | up   | 43274078 | 43281143 | + | 7066  | otein_codi #####       |
| 1.09E-05 | 0.000123 | down | 1.04E+08 | 1.04E+08 | + | 3598  | otein_codi --          |
| 3.66E-07 | 6.14E-06 | down | 15638085 | 15644781 | - | 6697  | otein_codi3677,DNA     |
| 0.000523 | 0.003454 | down | 21991467 | 21993337 | - | 1871  | otein_codi #####       |
| 0.000152 | 0.001207 | down | 1.55E+08 | 1.55E+08 | - | 4342  | otein_codi3677,DNA     |
| 8.2E-09  | 2.01E-07 | down | 35335839 | 35337715 | + | 1877  | otein_codi #####       |
| 6.5E-05  | 0.000584 | down | 20155349 | 20159943 | + | 4595  | otein_codi --          |
| 2.23E-12 | 1.09E-10 | down | 1.37E+08 | 1.37E+08 | - | 3606  | otein_codi --          |
| 1.92E-07 | 3.46E-06 | down | 53584503 | 53588907 | - | 4405  | otein_codi #####       |
| 0.001865 | 0.01001  | down | 9873520  | 9886893  | - | 13374 | otein_codi:0008270,z   |
| 0.002133 | 0.011166 | down | 4287692  | 4289179  | + | 1488  | otein_codi #####       |
| 0.009565 | 0.038031 | up   | 40133651 | 40137664 | + | 4014  | otein_codi #####       |
| 0.002146 | 0.011216 | down | 1.11E+08 | 1.11E+08 | + | 1317  | otein_codi --          |
| 5.87E-05 | 0.000535 | down | 28296178 | 28298188 | - | 2011  | otein_codiment; GO:C   |
| 9.7E-06  | 0.000112 | down | 2968102  | 2969592  | + | 1491  | otein_codi #####       |
| 9.17E-06 | 0.000107 | down | 1.24E+08 | 1.24E+08 | - | 1320  | otein_codi --          |
| 0.000787 | 0.00488  | down | 30175294 | 30177526 | - | 2233  | otein_codiment; GO:C   |
| 1.26E-06 | 1.85E-05 | down | 1.06E+08 | 1.06E+08 | + | 2841  | otein_codi #####       |
| 7.91E-17 | 8.39E-15 | down | 46225686 | 46232216 | + | 6531  | otein_codi #####       |
| 0.001944 | 0.010351 | up   | 1738701  | 1741196  | + | 2496  | otein_codi #####       |
| 0.011765 | 0.044806 | up   | 1.41E+08 | 1.41E+08 | + | 2085  | otein_codi #####       |
| 0.006061 | 0.026275 | up   | 381336   | 384254   | + | 2919  | otein_codi #####       |
| 5.59E-05 | 0.000513 | down | 1.34E+08 | 1.34E+08 | - | 2898  | otein_codi #####       |
| 1.26E-17 | 1.52E-15 | down | 1.28E+08 | 1.28E+08 | + | 7450  | otein_codi #####       |
| 2.13E-12 | 1.05E-10 | up   | 4534427  | 4537991  | + | 3565  | otein_codi43161,pro    |
| 3.48E-09 | 9.3E-08  | up   | 1.11E+08 | 1.11E+08 | + | 14954 | otein_codiweed germin  |
| 0.004986 | 0.022454 | down | 2394098  | 2401531  | + | 7434  | otein_codiweed germin  |
| 8.94E-06 | 0.000104 | down | 2381282  | 2383293  | + | 2012  | otein_codi7,protein ul |
| 7.08E-05 | 0.00063  | down | 9157463  | 9160745  | - | 3283  | otein_codi #####       |
| 0.000148 | 0.001182 | down | 65214844 | 65219781 | - | 4938  | otein_codi #####       |
| 0.000276 | 0.002007 | down | 1.3E+08  | 1.3E+08  | - | 2798  | otein_codistress; GO:  |
| 1.1E-05  | 0.000124 | down | 65582832 | 65588937 | + | 6106  | otein_codi #####       |
| 8.93E-10 | 2.74E-08 | down | 80705633 | 80711418 | + | 5786  | otein_codi #####       |
| 0.000213 | 0.001611 | up   | 4227959  | 4229393  | - | 1435  | otein_codition; GO:0   |
| 2.72E-10 | 9.16E-09 | up   | 8006109  | 8010511  | - | 4403  | otein_codi #####       |
| 0.002963 | 0.014596 | down | 1.32E+08 | 1.32E+08 | - | 2807  | otein_codistress; GO:  |
| 7.7E-12  | 3.46E-10 | up   | 7117018  | 7120277  | - | 3260  | otein_codi43161,pro    |
| 5.92E-09 | 1.51E-07 | up   | 9597128  | 9601553  | - | 4426  | otein_codi #####       |
| 6.32E-08 | 1.28E-06 | down | 18951483 | 18954427 | + | 2945  | otein_codi #####       |
| 0.0005   | 0.003319 | down | 1.59E+08 | 1.59E+08 | - | 3520  | otein_codi. binding tr |
| 1.12E-06 | 1.67E-05 | up   | 25189940 | 25192989 | - | 3050  | otein_codi #####       |
| 1.66E-06 | 2.38E-05 | down | 1.5E+08  | 1.5E+08  | - | 3990  | otein_codi --          |
| 1.99E-05 | 0.000208 | down | 4078092  | 4080954  | - | 2863  | otein_codi. binding tr |

|          |          |      |          |          |   |      |            |              |
|----------|----------|------|----------|----------|---|------|------------|--------------|
| 1.89E-08 | 4.35E-07 | down | 62047203 | 62051030 | - | 3828 | otein_codi | --           |
| 2.97E-06 | 3.97E-05 | down | 1.17E+08 | 1.17E+08 | + | 2473 | otein_codi | --           |
| 3.9E-21  | 7.87E-19 | down | 1.14E+08 | 1.14E+08 | + | 3415 | otein_codi | --           |
| 0.00118  | 0.006839 | up   | 1.2E+08  | 1.2E+08  | - | 3194 | otein_codi | --           |
| 0.001435 | 0.008061 | up   | 1.04E+08 | 1.04E+08 | + | 3581 | otein_codi | #####        |
| 3.49E-09 | 9.31E-08 | down | 1.59E+08 | 1.59E+08 | + | 3421 | otein_codi | --           |
| 0.000137 | 0.001103 | up   | 23717934 | 23721601 | - | 3668 | otein_codi | #####        |
| 0.00115  | 0.006692 | up   | 89983860 | 89987505 | + | 3646 | otein_codi | #####        |
| 0.008798 | 0.035561 | down | 81003988 | 81008100 | - | 4113 | otein_codi | inosphatidyl |
| 0.00874  | 0.035381 | down | 111389   | 115501   | + | 4113 | otein_codi | inosphatidyl |
| 0.008414 | 0.034341 | down | 6531411  | 6532295  | - | 885  | otein_codi | --           |
| 0.008414 | 0.034341 | down | 6531411  | 6532295  | - | 885  | otein_codi | --           |
| 0.000309 | 0.002209 | up   | 19805117 | 19808684 | + | 3568 | otein_codi | #####        |
| 1.17E-06 | 1.73E-05 | up   | 1.49E+08 | 1.49E+08 | + | 1832 | otein_codi | #####        |
| 0.00064  | 0.004095 | up   | 1.07E+08 | 1.07E+08 | - | 5916 | otein_codi | #####        |
| 1.4E-05  | 0.000153 | up   | 17012671 | 17016947 | + | 4277 | otein_codi | #####        |
| 0.003049 | 0.01495  | up   | 12660139 | 12662090 | - | 1952 | otein_codi | --           |
| 7.26E-05 | 0.000644 | up   | 5754659  | 5757697  | - | 3039 | otein_codi | 43565,seq    |
| 1.12E-14 | 8.19E-13 | down | 25743186 | 25749644 | + | 6459 | otein_codi | ing; GO:00   |
| 0.001874 | 0.010051 | up   | 1.38E+08 | 1.38E+08 | + | 3791 | otein_codi | #####        |
| 0.000668 | 0.004241 | up   | 1.06E+08 | 1.06E+08 | - | 2209 | otein_codi | --           |
| 0.002991 | 0.014704 | up   | 1.2E+08  | 1.2E+08  | - | 2805 | otein_codi | #####        |
| 0.00473  | 0.021494 | up   | 1.1E+08  | 1.1E+08  | + | 1808 | otein_codi | #####        |
| 6.16E-13 | 3.4E-11  | down | 1.33E+08 | 1.33E+08 | - | 4252 | otein_codi | #####        |
| 2.14E-06 | 2.97E-05 | up   | 1.49E+08 | 1.49E+08 | + | 1556 | otein_codi | #####        |
| 8.28E-12 | 3.69E-10 | down | 37412496 | 37419499 | + | 7004 | otein_codi | ing; GO:00   |
| 5.09E-11 | 1.97E-09 | up   | 1.23E+08 | 1.23E+08 | + | 2087 | otein_codi | #####        |
| 7.23E-05 | 0.000641 | up   | 16682476 | 16684568 | + | 2093 | otein_codi | :0050832,    |
| 2.09E-09 | 5.94E-08 | up   | 11478720 | 11481948 | + | 3229 | otein_codi | 43565,seq    |
| 0.000332 | 0.002348 | up   | 1.08E+08 | 1.08E+08 | - | 2321 | otein_codi | --           |
| 4.44E-06 | 5.63E-05 | up   | 35583333 | 35587372 | + | 4040 | otein_codi | GO:004356    |
| 3.02E-15 | 2.44E-13 | down | 2850620  | 2857046  | + | 6427 | otein_codi | #####        |
| 0.00109  | 0.006411 | up   | 8447212  | 8449199  | + | 1988 | otein_codi | GO:004356    |
| 2.78E-06 | 3.75E-05 | up   | 1.04E+08 | 1.04E+08 | - | 5131 | otein_codi | #####        |
| 1.05E-06 | 1.57E-05 | up   | 1.33E+08 | 1.33E+08 | - | 951  | otein_codi | --           |
| 0.001007 | 0.005996 | down | 1.09E+08 | 1.09E+08 | - | 2554 | otein_codi | GO:004356    |
| 1.27E-05 | 0.000142 | down | 11449476 | 11457025 | - | 7550 | otein_codi | --           |
| 2.66E-09 | 7.35E-08 | up   | 4442239  | 4445553  | - | 3315 | otein_codi | #####        |
| 0.012209 | 0.046109 | up   | 9864670  | 9866514  | - | 1845 | otein_codi | #####        |
| 1.7E-12  | 8.5E-11  | down | 1.19E+08 | 1.19E+08 | - | 4247 | otein_codi | #####        |
| 0.000263 | 0.001927 | down | 17402091 | 17405101 | + | 3011 | otein_codi | 43565,seq    |
| 3.94E-12 | 1.87E-10 | down | 1553337  | 1558186  | - | 4850 | otein_codi | #####        |
| 0.003832 | 0.018078 | up   | 95307717 | 95311361 | - | 3645 | otein_codi | #####        |

| KEGG        | KOG       | NR                     | SwissProt                                                        | TrEMBL |
|-------------|-----------|------------------------|------------------------------------------------------------------|--------|
| --          | At3g42790 | bunit A-8 ifinger prot | LFIN-LIKE 3-like isoform X2 {ECO:0000313 RefSeq:                 |        |
| 2-like fact | At2g28550 | ctor RAP2              | Name: Ful0313 EMBL:KRH24962.1, ECO:0000313 EnsemblPla            |        |
| 2-like fact | At2g28550 | factor RAP2            | Name: Ful0313 EMBL:KRH24962.1, ECO:0000313 EnsemblPla            |        |
| Γ; AP2-like | At3g54320 | ctor WRI1              | me: Full=Paracterized protein {ECO:0000313 EMBL:OIW06152.        |        |
| --          | At1g75490 | t-binding pponsive ele | 0313 EMBL:KRH61095.1, ECO:0000313 EnsemblPla                     |        |
| --          | At3g16770 | tion factor            | ##### sponsive factor 2 {ECO:0000313 EMBL:ACM79120.              |        |
| EBP; EREI   | At2g23340 | ption facto            | hylene-resp element binding factor 2 {ECO:0000313 EMBL:AFU       |        |
| 2-like fact | At4g36920 | h APETAL               | protein Alcterized protein {ECO:0000313 EMBL:ESW28773.1};        |        |
| --          | At2g40340 | t-binding pponsive ele | e element binding factor 6 {ECO:0000313 EMBL:AFU                 |        |
| --          | At2g40340 | t-binding pponsive ele | e element binding factor 6 {ECO:0000313 EMBL:AFU                 |        |
| EBP; EREI   | At5g07580 | ption facto            | hylene-resp transcription factor ERF107 {ECO:0000313 RefSeq:X    |        |
| EBP; EREI   | At5g11590 | t-binding pnsive elem  | enscription factor {ECO:0000313 EMBL:CAW30732.1                  |        |
| --          | At5g61890 | ption facto            | 000303 Puacterized protein {ECO:0000313 EMBL:ESW23712.1};        |        |
| EBP; EREI   | At3g16770 | ption facto            | ##### sponsive factor 2 {ECO:0000313 EMBL:ACM79120.              |        |
| EBP; EREI   | At5g44210 | scription fart=        | AtERF9.1}; SubName: Full=Ethylene-responsive element-bind        |        |
| --          | At1g71520 | tion factor            | hylene-resp ass transcription factor {ECO:0000313 EMBL:AES939    |        |
| --          | At5g07580 | tion factor            | hylene-resp transcription factor ERF107 {ECO:0000313 RefSeq:X    |        |
| --          | At5g05410 | lement-bin             | pponsive ele0313 EMBL:ACU13469.1, ECO:0000313 EnsemblPla         |        |
| --          | At5g47220 | riptional ac           | anscription transcriptional activator PTI5-like {ECO:0000313 Ref |        |
| --          | At4g17500 | riptional anscription  | transcriptional activator PTI5-like {ECO:0000313 Ref             |        |
| --          | At3g23240 | tion factor            | =AtERF1B;cterized protein {ECO:0000313 EMBL:CCB58688.1};         |        |
| Γ; AP2-like | --        | --                     | -- sponsive transcription factor {ECO:0000313 EMBL:AF            |        |
| --          | At5g50080 | tion factor            | hylene-resp transcription factor {ECO:0000313 EMBL:ALA09116      |        |
| --          | --        | --                     | -- omain-containing protein {ECO:0000313 EMBL:KVI0               |        |
| Γ; AP2-like | At4g37750 | anscriptiore C mutant  | cterized protein {ECO:0000313 EMBL:ESW27793.1};                  |        |
| EBP; EREI   | At5g67190 | tion factor            | hylene-resp element binding factor 2 {ECO:0000313 EMBL:AFU       |        |
| EBP; EREI   | At2g40220 | ption facto            | ##### cterized protein {ECO:0000313 EMBL:ESR49014.1};            |        |
| AV; RAV     | At1g25560 | g transcript           | tName: Ful0313 EMBL:KRH70603.1, ECO:0000313 EnsemblPla           |        |
| --          | At1g04880 | _B protein             | 15in 15; AltN0313 EMBL:KRH36268.1, ECO:0000313 EnsemblPla        |        |
| --          | At1g04880 | _B protein             | 1in 15; AltN0313 EMBL:KRH36268.1, ECO:0000313 EnsemblPla         |        |
| ixin-respon | At4g29080 | otein IAA2             | otein 27; A n-induced protein {ECO:0000256 RuleBase:RU004549     |        |
| ixin-respon | At5g43700 | ein 22D [A 22D;        | AltNduced protein {ECO:0000256 RuleBase:RU004549};               |        |
| ixin-respon | At1g04240 | ein IAA4 [A 22B;       | AltN-induced protein {ECO:0000256 RuleBase:RU004549              |        |
| --          | --        | tein IAA15             | --                                                               |        |
| ixin-respon | At4g29080 | otein IAA2             | otein 27; A n-induced protein {ECO:0000256 RuleBase:RU004549     |        |
| --          | At3g04730 | n AUX28                | : Full=Auxduced protein {ECO:0000256 RuleBase:RU004549};         |        |
| --          | At3g16500 | tein IAA26             | ill=Indolean-induced protein {ECO:0000256 RuleBase:RU004549      |        |
| ixin-respon | At4g29080 | otein IAA2             | otein 27; A n-induced protein {ECO:0000256 RuleBase:RU004549     |        |
| ixin-respon | At4g29080 | tein IAA27             | otein 27; A n-induced protein {ECO:0000256 RuleBase:RU004549     |        |
| --          | At5g65670 | otein IAA              | otein IAA9nduced protein {ECO:0000256 RuleBase:RU004549};        |        |
| --          | At5g65670 | otein IAA              | otein IAA9nduced protein {ECO:0000256 RuleBase:RU004549};        |        |
| ixin-respon | At3g23050 | tein IAA14:            | Full=Indoinduced protein {ECO:0000256 RuleBase:RU004549};        |        |
| ixin-respon | At5g43700 | ein IAA4 [A 22B;       | AltN-induced protein {ECO:0000256 RuleBase:RU004549              |        |

```

--      --      ein Os01g03 domain-0313|EMBL:KRH15287.1, ECO:0000313|EnsemblPlai
--      At1g49480ein At5g18      --      --
--      At5g66980ig protein /ative B3 ddomain-containing protein {ECO:0000313|EMBL:KHN
--      At3g19180_rotein At5g=B3 domaing protein At5g42700-like {ECO:0000313|RefSeq:XP
--      --      on factor A]      --      ining transcription factor ABI3 {ECO:0000313|EMBL:
--      --      g0905400-1      --      0313|EMBL:KRH63711.1, ECO:0000313|EnsemblPlai
--      At4g01580ion factor =B3 domaiprotein {ECO:0000313|EMBL:ESW25410.1}; Flags: F
--      --      n Os06g0113 domain-acterized protein {ECO:0000313|EMBL:ESW29812.1};
--      At3g26790 [Arachis hng transcrip]=FUSCA3 {ECO:0000313|EMBL:AGI43901.1};
--      At2g30470epressor V13 domain-(aracterized protein {ECO:0000313|EMBL:BAT97615.
--      --      ein At5g18      --      --
--      At1g49480ption factortein RELA0313|EMBL:KRG90691.1, ECO:0000313|EnsemblPlai
--      --      YMA_11C      --      )313|EMBL:KRH29567.1, ECO:0000313|EnsemblPlan
--      At2g46870in Os03g01g transcriptaracterized protein {ECO:0000313|EMBL:OIW04558.
--      At4g30080r 10-like [n response n response factor {ECO:0000256|RuleBase:RU004561
--      At4g3008016 isoform n response esponse factor {ECO:0000256|RuleBase:RU004561};
, ARF; auxAt5g60450factor 4 [Ame: Full=/n response factor {ECO:0000256|RuleBase:RU004561
, ARF; auxAt2g33860factor 3 [A response fesponse factor {ECO:0000256|RuleBase:RU004561};
, ARF; auxAt2g46530ctor 4-like me: Full=An response factor {ECO:0000256|RuleBase:RU004561
--      At5g60450factor 4 [Ame: Full=/n response factor {ECO:0000256|RuleBase:RU004561
, ARF; auxAt4g23980 9 isoform me: Full=An response factor {ECO:0000256|RuleBase:RU004561
, ARF; auxAt4g23980 9 isoform me: Full=Aesponse factor {ECO:0000256|RuleBase:RU004561};
--      At2g28350tor 10-like n response n response factor {ECO:0000256|RuleBase:RU004561
--      At1g30330 6 isoform in responseresponse factor {ECO:0000256|RuleBase:RU004561};
--      At4g30080ctor 18 [An responseresponse factor {ECO:0000256|RuleBase:RU004561};
/tochrome-At1g09530tor PIF3 [Aort=OsbHL0313|EMBL:KRH33665.1, ECO:0000313|EnsemblPlai
/tochrome-At1g09530r PIF3 [A ##### 0313|EMBL:KRH33665.1, ECO:0000313|EnsemblPlai
--      At2g40200bHLH51 [rt=AtbHLFacterized protein {ECO:0000313|EMBL:KOM39605
--      At3g07340bHLH78 [rt=AtbHLFacterized protein {ECO:0000313|EMBL:ESW06158.1}
--      At1g22490r bHLH96 rt=AtbHLF0313|EMBL:KRG92821.1, ECO:0000313|EnsemblPlan
--      At5g39860r PRE6 [A ##### cterized protein {ECO:0000313|EMBL:EMJ16398.1};
--      At3g26744ICE1-like [ ##### racterized protein {ECO:0000313|EMBL:OIW15378.1
--      --      ix-loop-heFull=Basic aracterized protein {ECO:0000313|EMBL:KOM35016
--      At1g095303 isoform 3 ##### n factor PIF3-like {ECO:0000313|RefSeq:XP_0188365
--      At1g72210bHLH71 [rt=AtbHLFacterized protein {ECO:0000313|EMBL:ESW28413.1}
--      At3g26744r ICE1 [A ##### 0313|EMBL:KRH06842.1, ECO:0000313|EnsemblPlai
--      At2g22770NAI1, partirt=AtbHLFacterized protein {ECO:0000313|EMBL:ESW07780.1};
--      --      protein A-Full=Basic p-helix protein A-like {ECO:0000313|RefSeq:XP_014
--      At4g34530r BEE 2 [ ##### 0313|EMBL:KRH29448.1, ECO:0000313|EnsemblPlai
--      At3g26744CREAM2-1 ##### :0000313|EMBL:KHN17463.1}; EC=1.3.1.74 {ECO:0
--      At5g65640bHLH93 [rt=AtbHLFnscription factor {ECO:0000313|EMBL:ALA09121.1};
; transcriptiAt1g32640r MYC2 [A ##### n factor MYC2-like {ECO:0000313|RefSeq:XP_01450
--      --      : bHLH137      --      1 factor bHLH137 family {ECO:0000313|EMBL:KYP4
--      At4g20970HLH162-liShort=AtbIption factor bHLH36 {ECO:0000313|EMBL:KHN3522
--      At3g56770actor bHLFShort=Atblfactor bHLH106-like {ECO:0000313|RefSeq:XP_0045

```



-- At5g65640bHLH61 [rt=AtbHLH]ption factor bHLH93 {ECO:0000313|EMBL:KYP6638  
-- At2g22760NAI1, partirt=AtbHLH0313|EMBL:KRH47400.1, ECO:0000313|EnsemblPla  
-- -- : bHLH118 -- iption factor bHLH36 {ECO:0000313|EMBL:KYP3146  
-- At5g65640r bHLH61 rt=AtbHLH0:0000313|EMBL:KHN04892.1}; EC=1.3.1.74 {ECO:  
-- At2g40200r bHLH51 rt=AtbHLH]aracterized protein {ECO:0000313|EMBL:KOM39605  
-- At1g63650 A-like isoFull=Basicp-helix protein A-like {ECO:0000313|RefSeq:XP\_014  
-- At5g39860r PRE6 [A ##### cterized protein {ECO:0000313|EMBL:EMJ16398.1};  
-- At4g37850r bHLH18 rt=AtbHLH]ption factor bHLH25 {ECO:0000313|EMBL:KHN4750  
-- At1g22490HLH96-like rt=AtbHLH0313|EMBL:KRG92821.1, ECO:0000313|EnsemblPlan  
-- At2g42280: bHLH130rt=AtbHLH]tion factor bHLH130 {ECO:0000313|EMBL:KHN262  
; transcriptiAt1g32640bHLH14 [L ##### )0313|EMBL:KRH06400.1, ECO:0000313|EnsemblPla  
iscription fAt3g06120: MUTE [A=AtbHLH]ption factor MUTE {ECO:0000313|EMBL:KYP72837  
-- At3g07340r bHLH78 rt=AtbHLH]cterized protein {ECO:0000313|EMBL:ESW06158.1}  
-- At4g34530l63 isoform ##### cterized protein {ECO:0000313|EMBL:AFK40379.1};  
-- At4g20970HLH162-lisshort=Atb]cterized protein {ECO:0000313|EMBL:ESW10085.1}  
-- At3g26744CREAM2-1 ##### lLA09129.1}; SubName: Full=Inducer of CBF expressi  
-- At4g34530bHLH63 [L ##### cription factor {ECO:0000313|EMBL:AES89129.1};  
-- At3g21330HLH87-like rt=AtbHLH]oop-helix protein BHLH11 {ECO:0000313|EMBL:ACI  
-- At4g37850l18 isoformrt=AtbHLH]cterized protein {ECO:0000313|EMBL:ESW27775.1};  
-- At5g65640r bHLH93 rt=AtbHLH0313|EMBL:KRH16909.1, ECO:0000313|EnsemblPlar  
-- At2g31220HLH91-like rt=AtbHLH0313|EMBL:KRH58537.1, ECO:0000313|EnsemblPlan  
-- At5g65640r bHLH93 rt=AtbHLH0313|EMBL:KRH16909.1, ECO:0000313|EnsemblPlar  
-- At1g74500:or PRE3 [L ##### terized protein {ECO:0000313|EMBL:AFK36119.1};  
-- At1g68810r bHLH30 rt=AtbHLH]aracterized protein {ECO:0000313|EMBL:ONI31297.1  
-- At3g26744tor ICE1 [L ##### CBF expression 2 {ECO:0000313|EMBL:AGP04218.1  
-- At4g37850H25 isoformrt=AtbHLH]ption factor bHLH25 {ECO:0000313|EMBL:KHN190  
-- At3g19860bHLH121 [t=AtbHLH]factor bHLH121-like {ECO:0000313|RefSeq:XP\_0145  
-- At4g37850H25 isoformrt=AtbHLH]ption factor bHLH25 {ECO:0000313|EMBL:KHN190  
-- -- r bHLH96 rt=AtbHLH0313|EMBL:KRG96859.1, ECO:0000313|EnsemblPlar  
-- At3g56770:tor bHLH]Short=Atb]factor bHLH106-like {ECO:0000313|RefSeq:XP\_0045  
-- At1g10120H74 isofo ##### cterized protein {ECO:0000313|EMBL:ESW32948.1};  
-- At1g49770r bHLH95 ##### ption factor bHLH95 {ECO:0000313|EMBL:KYP4558  
, MRF4; mAt1g72210bHLH96 [rt=AtbHLH]aracterized protein {ECO:0000313|EMBL:BAT78487.  
-- At1g10120H74 isofo ##### cterized protein {ECO:0000313|EMBL:ESW32948.1};  
-- At4g37850bHLH18 [rt=AtbHLH0313|EMBL:KRH23624.1, ECO:0000313|EnsemblPla  
-- At1g72210bHLH96 [rt=AtbHLH]ption factor bHLH96 {ECO:0000313|EMBL:KYP7436  
-- At4g37850bHLH18 [rt=AtbHLH0313|EMBL:KRH28296.1, ECO:0000313|EnsemblPlan  
, MRF4; mAt1g72210bHLH96 [rt=AtbHLH]ption factor bHLH96 {ECO:0000313|EMBL:KHN273  
-- At4g20970bHLH162 [short=Atb]ption factor bHLH36 {ECO:0000313|EMBL:KHN3522  
-- At3g58120pper 34 [Ad:1190683: transcription factor {ECO:0000313|EMBL:KEH39223  
-- At2g36270-INSENSI=AtDPBFSIC ACID-INSENSITIVE 5 {ECO:0000313|EMBL:KY  
; transcriptiAt1g43700tor VIP1 [Ae: Full=Trcterized protein {ECO:0000313|EMBL:ESW24040.1};  
-- At4g36730ke isoform=AtGBF1;x-binding factor 1 {ECO:0000313|EMBL:KHM99021.  
-- At5g440804 isoform ##### g factor 4 {ECO:0000313|EMBL:KYP78381.1}; Flags:  
; transcriptiAt1g686402.2 isoformNTHIA; Ahracterized protein {ECO:0000313|EMBL:OIW16686.1

; transcriptiAt5g65210A1 isoformnding prote0313|EMBL:KRH43267.1, ECO:0000313|EnsemblPlai  
 -- At3g58120er 61-like [d:1190683;ine zipper 34-like {ECO:0000313|RefSeq:XP\_0145243  
 -- At3g17610\_like isoform=bZIP transn factor HY5-like {ECO:0000313|RefSeq:XP\_004514;  
 ; transcriptiAt1g08320\_A9 isoform #####:ific DNA-binding protein TGA-2.1 {ECO:0000313|EM  
 -- -- i factor 60 [t=OsbZIP5cription factor 60 {ECO:0000313|RefSeq:XP\_0045147  
 -- At5g28770ein CPRF2RF2; AltName:IP protein {ECO:0000313|EMBL:BAG24402.1};  
 -- At5g440804 isoform #####; factor 4 {ECO:0000313|EMBL:KYP78381.1}; Flags:  
 ; transcriptiAt5g65210ription facnding protei X1 {ECO:0000313|RefSeq:XP\_004502460.1, ECO:00  
 plant G-bo:At2g35530factor 16 [t {ECO:0000313|EMBL:KRH39597.1, ECO:0000313|EnsemblPlan  
 -- At2g36270[NSENSIT]=AtDPBFacterized protein {ECO:0000313|EMBL:ESW34886.1};  
 -- At3g58120er 61-like [d:1190683;ine zipper 34-like {ECO:0000313|RefSeq:XP\_0145243  
 ; transcriptiAt1g68640.2-like isofNTHIA; Ahracterized protein {ECO:0000313|EMBL:OIW16686.1  
 ; transcriptiAt1g43700tor VIP1 [ae: Full=Tracterized protein {ECO:0000313|EMBL:ESW24040.1};  
 ; transcriptiAt3g122502.3 isoformnce-specifi;terized protein {ECO:0000313|EMBL:AFK49203.1};  
 -- At2g40620r RF2b [Aie: Full=Tr0313|EMBL:KRH17183.1, ECO:0000313|EnsemblPlai  
 -- At4g36730 -- -- x-binding factor 1 {ECO:0000313|EMBL:KHM99021.  
 ; transcriptiAt5g65210A1 isoform nding prote0313|EMBL:KRH43267.1, ECO:0000313|EnsemblPlai  
 -- At1g75390actor 11-lik {ECO:000racterized protein {ECO:0000313|EMBL:KRH05862.1  
 -- At3g58120per 34 [Ar:d:1190683; transcription factor {ECO:0000313|EMBL:KEH39223  
 -- At1g75390:tor 11-like {ECO:000nding factor, putative {ECO:0000313|EMBL:EEF5262  
 AMP-depAt5g28770ein CPRF2RF2; AltName:IP protein {ECO:0000313|EMBL:BAG24402.1};  
 -- At3g58120r 61-like [d:1190683;ine zipper 34-like {ECO:0000313|RefSeq:XP\_0144989  
 -- At1g25440TANS-LIK=Zinc fingaracterized protein {ECO:0000313|EMBL:OIW09668.  
 -- At1g25440STANS-LI=Zinc fingn CONSTANS-LIKE 16 {ECO:0000313|RefSeq:XP\_0  
 : finger prcAt5g24930STANS-LI=Zinc fing; CONSTANS-LIKE 4-like {ECO:0000313|RefSeq:XP\_  
 -- At1g25440TANS-LIK=Zinc fingn CONSTANS-LIKE 16 {ECO:0000313|RefSeq:XP\_0  
 : finger prcAt5g24930TANS-LIK=Zinc fing; CONSTANS-LIKE 4-like {ECO:0000313|RefSeq:XP\_  
 -- At1g25440STANS-LI=Zinc fingn CONSTANS-LIKE 16 {ECO:0000313|RefSeq:XP\_0  
 -- At5g62940in DOF5.6 of zinc fingr protein DOF5.6-like {ECO:0000313|RefSeq:XP\_0144  
 -- At5g60850DF1.4 isofo DOF5.4; Sc finger protein {ECO:0000313|EMBL:OVA00370.1};  
 -- -- DF2.1 isofo -- r protein DOF2.1-like {ECO:0000313|RefSeq:XP\_014.  
 -- At1g51700DOF1.7-libf zinc fingnc finger protein DOF1.7 {ECO:0000313|EMBL:KYP5  
 -- At3g61850F3.7 isofocting germ;terized protein {ECO:0000313|EMBL:AFK44127.1};  
 -- -- F2.2 isofo -- in DOF2.2-like isoform X1 {ECO:0000313|RefSeq:XP  
 -- At1g51700DOF1.7-libf zinc fingnc finger protein DOF1.7 {ECO:0000313|EMBL:KYP5  
 -- At2g34140ein DOF1.5;ltName: Fiaracterized protein {ECO:0000313|EMBL:OIV91978.1  
 -- At5g62940F5.6 isofof zinc fingr protein DOF5.6-like {ECO:0000313|RefSeq:XP\_0144  
 -- At3g61850DF1.4 isofocting germr protein, putative {ECO:0000313|EMBL:EEF50839.1}  
 -- At5g62940F5.6 isofof zinc fingacterized protein {ECO:0000313|EMBL:ESW10068.1};  
 -- At2g34140DOF1.5-likltName: Fiaracterized protein {ECO:0000313|EMBL:BAT73624.  
 -- -- ein DOF5.6f zinc fingr protein DOF5.6-like {ECO:0000313|RefSeq:XP\_0144  
 -- At2g28510F3.2 isofof zinc finger protein DOF2.1-like {ECO:0000313|RefSeq:XP\_014.  
 -- -- DF2.5 isofo -- ;terized protein {ECO:0000313|EMBL:AFK44127.1};  
 -- At3g61850in DOF3.7 cting germDNA-binding family protein {ECO:0000313|EMBL:AI  
 -- At3g61850ein DOF3.6f zinc fingaracterized protein {ECO:0000313|EMBL:BAT78863.

-- -- in DOF1.4 -- finger 3 protein {ECO:0000313|EMBL:ACF74278.1};  
-- At3g61850 DOF1.4 isoform protein, putative {ECO:0000313|EMBL:EEF50839.1}  
-- At2g37590 in DOF2.5 zinc finger protein DOF3.6-like {ECO:0000313|RefSeq:XP\_014  
-- At1g28310 DOF2.2 isoform of zinc finger factor 2 {ECO:0000313|EMBL:ATG31849.1}; Flags: F  
-- At3g50870 factor 18 [e: Full=GA0313|EMBL:KRH28681.1, ECO:0000313|EnsemblPlas  
-- -- on factor 8 -- transcription factor {ECO:0000256|PIRNR:PIRNR016  
-- At3g06740 factor 16 [e: Full=GAtranscription factor family protein {ECO:0000313|EMB  
-- At4g32890 on factor 2 [e: Full=GAcharacterized protein {ECO:0000313|EMBL:ESW33921.1}  
-- At4g32890 on factor 2 [e: Full=GAcharacterized protein {ECO:0000313|EMBL:ESW33921.1}  
-- -- -- factor 8 [ -- transcription factor {ECO:0000256|PIRNR:PIRNR016  
-- -- -- on factor 9 [e: Full=GAtranscription factor {ECO:0000256|PIRNR:PIRNR016992  
3; GATA-1 At4g32890 factor 1-like [e: Full=GAcharacterized protein {ECO:0000313|EMBL:KRH33499.1  
-- At4g00180 BBY 1 [e: Full=GAcharacterized protein {ECO:0000313|EMBL:OIW00956.  
-- At1g03840 te-domain [17785527] characterized protein {ECO:0000313|EMBL:BAT95063.  
-- At1g26610 OC107481 -- aracterized protein {ECO:0000313|EMBL:OIV94219.1  
-- At1g26610 LOC10763 -- icterized protein {ECO:0000313|EMBL:ESW30619.1};  
-- At1g66500 ge factor hclation and [0313|EMBL:KRH35572.1, ECO:0000313|EnsemblPlas  
-- At1g66140 tein 4 [Ar:Zinc fin[0313|EMBL:KRH72945.1, ECO:0000313|EnsemblPlar  
-- At1g02030 ZAT1-like [e: Full=Zi-finger protein, putative {ECO:0000313|EMBL:AES90  
-- At1g26610 ATPase isc -- 0313|EMBL:KRH75014.1, ECO:0000313|EnsemblPlas  
-- At2g28200 in ZAT5 [e: Full=Zer protein ZFP133 {ECO:0000313|EMBL:ACA51023.1  
-- At2g28710 in ZAT12 [AT12; AltNr protein ZAT12 {ECO:0000313|RefSeq:XP\_0144974  
-- At5g54630 LOC10761 -- aracterized protein {ECO:0000313|EMBL:OIW05964.1  
-- At5g67050 LOC10762 -- uloyl esterase A {ECO:0000313|EMBL:KYP45547.1};  
-- At5g66730 -domain 1 [Med:1678] ke zinc finger protein {ECO:0000313|EMBL:EOY1471  
-- At1g08290 in WIP3 [e: Full=Zi-finger protein, putative {ECO:0000313|EMBL:ESW04416.1};  
1; beta-gal At1g55110 te-domain [e: Full=Zi-finger protein, putative {ECO:0000313|EMBL:BAT98390.  
-- At1g02030 AT1-like [e: Full=Zi-finger protein, putative {ECO:0000313|EMBL:AES90  
-- At1g47860 OC107493 -- protein LOC106763069 {ECO:0000313|RefSeq:XP\_01  
-- At5g54630 LOC10761 -- aracterized protein {ECO:0000313|EMBL:OIW05964.1  
1; UBX do At2g01650 aining protene: Full=AX domain protein {ECO:0000313|EMBL:AET05390.1}  
-- At3g53600 ZAT12-like [e: Full=Zi-finger protein, putative {ECO:0000313|EMBL:AAZ03389.1}  
-- At1g03840 ACKDAW tein 3 {ECO:0000313|EMBL:BAT85701.  
-- At1g26610 OC107489 -- nger protein ZAT9 {ECO:0000313|EMBL:KHN03635.  
-- At3g45260 -domain 9 [PubMed:1] inc finger protein, putative {ECO:0000313|EMBL:AES  
-- -- 7482397 is -- aracterized protein {ECO:0000313|EMBL:KYP38308.1  
1; UBX do At2g01650 aining protene: Full=AX domain protein {ECO:0000313|EMBL:AET05390.1}  
-- At3g60580 in ZAT9 [e: Full=Zi-finger protein, putative {ECO:0000313|EMBL:BAT97623.  
-- At2g29660 LOC10760 -- 0313|EMBL:KRG98330.1, ECO:0000313|EnsemblPlan  
-- At1g03840 ACKDAW tein 3 {ECO:0000313|EMBL:KRH67672.1, ECO:0000313|EnsemblPlan  
-- At1g66140 zinc finger [e: Full=Zi-finger protein, putative {ECO:0000313|EMBL:KRH72945.1, ECO:0000313|EnsemblPlar  
-- 7294223 [13213] [H -- aracterized protein {ECO:0000313|EMBL:PIN14156.1  
-- -- -domain 2-lil -- 0313|EMBL:KRH33908.1, ECO:0000313|EnsemblPlar  
-- At1g80730 tein 1 [Ar:CO:0000313|EMBL:KRH61695.1, ECO:0000313|EnsemblPlan  
-- At5g52010 LOC10760 -- aracterized protein {ECO:0000313|EMBL:OMO78884.1

-- At3g18030ne decarbo.C; EC=4.1 se {ECO:0000313|EMBL:KHN03161.1}; EC=4.1.1.36  
 -- At2g28200in ZAT5 [ne: Full=Ziprotein {ECO:0000313|EnsemblPlants:GLYMA11G19  
 -- At1g08290in WIP3 [protein 3 {cterized protein {ECO:0000313|EMBL:ESW04416.1};  
 -- At3g45260te-domain [PubMed:1inc finger protein, putative {ECO:0000313|EMBL:AES  
 -- At2g28200AT5-like [ne: Full=Ziprotein {ECO:0000313|EnsemblPlants:GLYMA11G19  
 -- At1g215707460707 isntaining pH domain-containing protein 7 {ECO:0000313|EMBL:]  
 ; F-box ancAt5g51980taining proort=AtC3F0313|EMBL:KRH17014.1, ECO:0000313|EnsemblPlar  
 ; F-box ancAt5g51980g protein 4ort=AtC3F0313|EMBL:KRH17014.1, ECO:0000313|EnsemblPlar  
 in-protein Hs8850223akorin isofpe E3 ubiq0313|EMBL:KRH13923.1, ECO:0000313|EnsemblPlar  
 \_IN54; proAt4g14770CXC 2 isof; Short=At0313|EMBL:KRH77830.1, ECO:0000313|EnsemblPlan  
 -- At1g28050ANS-LIKI=Zinc fingaracterized protein {ECO:0000313|EMBL:KRH06867.  
 -- At4g38960protein 19 }; AltNamecterized protein {ECO:0000313|EMBL:ESW03746.1};  
 -- At4g38960protein 19 }; AltNamecterized protein {ECO:0000313|EMBL:ESW03746.1};  
 1 phosphatAt2g25620hatase 2C tein phosphin phosphatase 2C 27 {ECO:0000313|RefSeq:XP\_004.  
 ; transcriptAt3g48160r-like E2FAltName: Factor-like E2FE isoform X2 {ECO:0000313|RefSeq:XI  
 ; transcriptAt3g48160r-like E2FAltName: Eription factor E2F7 {ECO:0000313|EMBL:KYP38992  
 ; transcriptAt3g48160r-like E2FAltName: Eription factor E2F7 {ECO:0000313|EMBL:KYP38992  
 -- At4g38180EQUENCE=Protein FÆD SEQUENCE 5 {ECO:0000313|EMBL:KYP44692.  
 onent respAt1g67710tor ARR1 R26 {ECO:nt response regulator ARR11 {ECO:0000313|EMBL:K  
 onent respAt1g67710tor ARR1 R26 {ECO:nt response regulator ARR11 {ECO:0000313|EMBL:K  
 -- -- KAN1-lik -- aracterized protein {ECO:0000313|EMBL:BAT73614.  
 -- At5g16560N1-like ison repressoressor KAN1 isoform X3 {ECO:0000313|RefSeq:XP\_0  
 -- At2g03500O5 isoform #####)313|EMBL:KRH76947.1, ECO:0000313|EnsemblPlan  
 -- At2g20570K1 isoformO-RICH Response regulator-like APRR2 {ECO:0000313|EMBL:]  
 -- -- or HRS1 [. #####ription factor family protein {ECO:0000313|EMBL:KE  
 -- At4g28610ATION RIE 1 {ECO:n PHR1-LIKE 1 {ECO:0000313|RefSeq:XP\_00449558.  
 -- At1g25550or HRS1 [omain trans response regulator ARR2 {ECO:0000313|EMBL:KY  
 -- -- or KAN1 [on represso)313|EMBL:KRH17301.1, ECO:0000313|EnsemblPla  
 -- -- or KAN1-li -- aracterized protein {ECO:0000313|EMBL:OAY57218  
 -- At1g68670or HHO3 [ription faracterized protein {ECO:0000313|EMBL:OIW02257.1  
 -- At5g45580 factor PHIL11 {ECO:cterized protein {ECO:0000313|EMBL:ESW30193.1};  
 onent respAt2g25180tor ARR1 R22 {ECO:t response regulator {ECO:0000256|PIRNR:PIRNR036  
 -- At5g16560N1 isoformon repressoressor KAN1 isoform X3 {ECO:0000313|RefSeq:XP\_0  
 -- At2g20570LK1 isoformO-RICH Response regulator-like APRR2 {ECO:0000313|EMBL:]  
 -- At5g06800r PHL5 isdIL5 {ECO:)313|EMBL:KRG95366.1, ECO:0000313|EnsemblPla  
 -- At4g18020-like APRR APRR2; Aesponse regulator-like APRR2 {ECO:0000313|EMBL:  
 -- At2g01060 PHL7-likeIL7 {ECO:transcription factor APL {ECO:0000313|EMBL:KYP3  
 -- At2g03500O5 isoform #####)313|EMBL:KRH76947.1, ECO:0000313|EnsemblPlan  
 -- At4g28610ATION RIE 1 {ECO:n PHR1-LIKE 1 {ECO:0000313|RefSeq:XP\_00449558.  
 -- At1g68670r HHO3 [ription faracterized protein {ECO:0000313|EMBL:OIW02257.1  
 -- At1g69580n factor PHIL8 {ECO:protein LOC106777111 {ECO:0000313|RefSeq:XP\_0  
 -- At1g25550r HRS1 [Aomain trans0313|EMBL:KRG92028.1, ECO:0000313|EnsemblPlar  
 -- At2g30090e HLS1 iscbable N-acaracterized protein {ECO:0000313|EMBL:OIW16495.1  
 -- At2g23060e HLS1 iscbable N-acaracterized protein {ECO:0000313|EMBL:BAT75677.  
 -- At2g23060 HLS1 isofbable N-acaracterized protein {ECO:0000313|EMBL:BAT75677.

-- At2g41450\_07645523 -- interacting protein 1 {ECO:0000313|EMBL:KHN30400.1};  
 -- At2g41450\_OC107492 -- interacting protein 1 {ECO:0000313|EMBL:KHN30400.1};  
 -- At4g37580\_transferase\_HLSE\_PHOTOcharacterized protein {ECO:0000313|EMBL:ESW07819.1};  
 -- At3g22560\_OC107491 -- ECO:0000313|EMBL:KYP71767.1}; EC=2.3.1.- {ECO:0000313|EMBL:KYP71767.1};  
 -- At5g11340\_07630471 me: Full=Merized protein {ECO:0000313|EMBL:AFK33926.1};  
 -- At4g19980\_jilG\_09582 -- aracterized protein {ECO:0000313|EMBL:OIV89907.1};  
 -- At4g37580\_transferase\_HLSE\_PHOTOcharacterized protein {ECO:0000313|EMBL:ESW07819.1};  
 -- At2g30090\_LS1-like isbale N-acaracterized protein {ECO:0000313|EMBL:OIW16495.1};  
 -- Hs7661604-like prote -- ansferase 9-like protein {ECO:0000313|EMBL:KYP43000.1};  
 -- At1g07530\_Stein 14 [Aort=AtSCLv-like protein 14 {ECO:0000313|RefSeq:XP\_01257272.1};  
 -- At1g07530\_Stein 14 [Aort=AtSCLv-like protein 14 {ECO:0000313|RefSeq:XP\_01257272.1};  
 -- At1g07530\_Stein 14 [Aort=AtSCLv-like protein 14 {ECO:0000313|RefSeq:XP\_01257272.1};  
 -- At5g41920\_Stein 23 [Aort=AtSCLv-like protein 23 {ECO:0000313|RefSeq:XP\_01257272.1};  
 -- At5g48150\_Stein 23 [Aort=AtSCLv-like protein 23 {ECO:0000313|RefSeq:XP\_01257272.1};  
 -- At3g13840\_Stein 1 [Aort=AtSCLv-like protein 1 {ECO:0000313|RefSeq:XP\_01257272.1};  
 -- At3g13960\_Stein 6 isoform r 1; Short=alating factor-like protein {ECO:0000313|EMBL:KEH3000.1};  
 -- -- or 1 isoform -- 0313|EMBL:KRH19280.1, ECO:0000313|EnsemblPlat;  
 -- At4g37740\_Stein 6; Short=aracterized protein {ECO:0000313|EMBL:OIW15560.1};  
 -- At3g13960\_Stein 1 isoform or 5; Short=ng factor 1 isoform X1 {ECO:0000313|RefSeq:XP\_01257272.1};  
 -- -- factor 3 [A -- 0313|EMBL:KRH76368.1, ECO:0000313|EnsemblPlat;  
 -- At3g52910\_Stein 4; Short=acterized protein {ECO:0000313|EMBL:ESW34859.1};  
 -- -- factor 7 [A -- 0313|EMBL:KRG88736.1, ECO:0000313|EnsemblPlat;  
 -- At3g52910\_Stein 4; Short=acterized protein {ECO:0000313|EMBL:ESW34859.1};  
 -- -- factor 1 [A -- aracterized protein {ECO:0000313|EMBL:KYP79142.1};  
 -- At2g22840\_Stein 1 [or 1; Short=0313|EMBL:KRH05542.1, ECO:0000313|EnsemblPlat;  
 -- At2g23760\_Stein 4; Short=odomain protein 2 isoform 1 {ECO:0000313|EMBL:ESW34859.1};  
 -- At4g32980\_Stein 1 isoform me: Full=Hiaracterized protein {ECO:0000313|EMBL:BAT82526.1};  
 -- At2g23760\_Stein 4; Shorterized protein {ECO:0000313|EMBL:ESR39010.1};  
 meobox-lkAt1g69780 ATHB-13 me: Full=Hline zipper protein ATHB-13 {ECO:0000313|EMBL:KHN30400.1};  
 meobox-lkAt2g34710 protein AStein ATHB zipper protein ATHB-14 {ECO:0000313|RefSeq:XP\_01257272.1};  
 meobox-lkAt3g61150\_NTHOCY-ZIP protein SS 2-like isoform X1 {ECO:0000313|RefSeq:XP\_01257272.1};  
 meobox-lkAt3g01470\_r protein F: Full=Hon0313|EMBL:KRH54501.1, ECO:0000313|EnsemblPlat;  
 meobox-lkAt5g15150\_in HAT7 is: Full=Homucine zipper protein HAT7 {ECO:0000313|EMBL:KYP79142.1};  
 meobox-lkAt1g79840 protein GL me: Full=H0313|EMBL:KRH09884.1, ECO:0000313|EnsemblPlat;  
 meobox-lkAt3g60390\_Stein HAT3 AltName: lne zipper protein HAT3 {ECO:0000313|RefSeq:XP\_01257272.1};  
 meobox-lkAt2g34710 protein AStein ATHB zipper protein ATHB-14 {ECO:0000313|RefSeq:XP\_01257272.1};  
 meobox-lkAt1g79840 protein GL me: Full=Hne zipper protein GLABRA 2 {ECO:0000313|EMBL:KYP79142.1};  
 meobox-lkAt4g37790 protein HAltName: he zipper protein HAT22 {ECO:0000313|RefSeq:XP\_01257272.1};  
 -- At5g06710\_Stein HAT9 AltName: Icine zipper protein HOX19 {ECO:0000313|EMBL:KYP79142.1};  
 -- At5g46880\_Stein HAT9 AltName: Icine zipper protein HOX19 {ECO:0000313|EMBL:KYP79142.1};  
 meobox-lkAt4g40060\_in ATHB-(ne: Full=Hl protein/HALZ domain-containing protein {ECO:0000313|EMBL:ESW30247.1};  
 meobox-lkAt4g37790\_r protein HAltName: he zipper protein HAT22 {ECO:0000313|RefSeq:XP\_01257272.1};  
 meobox-lkAt3g01470\_r protein F: Full=Hon?\_012568041.1}; SubName: Full=homeobox-leucine zipper protein {ECO:0000313|EMBL:KRH35356.1, ECO:0000313|EnsemblPlat;  
 meobox-lkAt3g61150\_NTHOCY-ZIP protein 0313|EMBL:KRH35356.1, ECO:0000313|EnsemblPlat;  
 meobox-lkAt1g05230\_r protein Fmain GLA0313|EMBL:KRH25399.1, ECO:0000313|EnsemblPlat;  
 meobox-lkAt5g06710\_r protein HAltName: lcine zipper protein HAT14 {ECO:0000313|EMBL:KHN30400.1};

homeobox-like At4g40060 in ATHB-1 gene: Full=Homeobox protein/HALZ domain-containing protein {ECO:0000313|EMBL:OMO96203.1};  
 homeobox-like At4g32880 CUL1\_050 gene: Full=Characterized protein {ECO:0000313|EMBL:OMO96203.1};  
 homeobox-like At1g69780 protein A gene: Full=Homeobox zipper protein ATHB-13 {ECO:0000313|EMBL:KJ0313.1};  
 homeobox-like At1g69780 ATHB-13 gene: Full=Homeobox zipper protein ATHB-13 {ECO:0000313|EMBL:KJ0313.1, ECO:0000313|EnsemblPlant};  
 homeobox-like At1g62990 HD1 gene: Full=Characterized protein {ECO:0000313|EMBL:ESW30443.1};  
 -- At1g62360 HD1-like 1 gene: Full=Homeobox SBH1-like isoform X1 {ECO:0000313|RefSeq:XP\_001450001.1};  
 -- At1g70510 HD1-like 1-like protein gene: Full=Characterized protein {ECO:0000313|EMBL:BAT74700.1};  
 -- At1g62360 HD1 isoform 2 gene: Full=Homeobox transcription factor STM-like 2 {ECO:0000313|EMBL:AFK44130.1};  
 homeobox-like At1g70510 HD1-like 1-like protein gene: Full=Characterized protein {ECO:0000313|EMBL:AFK44130.1};  
 -- At1g62360 HD1 isoform 3 gene: Full=Homeobox transcription factor STM-like 2 {ECO:0000313|EMBL:AFK44130.1};  
 homeobox-like At4g36740 in ATHB-4 gene: Full=Homeobox protein ATHB-40 {ECO:0000313|EMBL:KYP66724.1};  
 -- HAT14-like 1 gene: Full=Homeobox transcription factor HAT14-like 1 {ECO:0000313|EMBL:ALA091001.1};  
 homeobox-like At4g36740 protein A gene: Full=Homeobox transcription factor HAT14-like 1 {ECO:0000313|EMBL:ALA091001.1};  
 -- At4g35550 homeobox 8 gene: Full=Homeobox transcription factor HAT14-like 1 {ECO:0000313|EMBL:ALA091001.1};  
 -- At3g11260 homeobox 5 gene: Full=WUSL-related homeobox 5 {ECO:0000313|EMBL:KHN130001.1};  
 -- homeobox 5-related homeobox 6 gene: Full=Homeobox transcription factor HAT14-like 1 {ECO:0000313|RefSeq:XP\_014500015.1};  
 -- homeobox 5-related homeobox 6 gene: Full=Homeobox transcription factor HAT14-like 1 {ECO:0000313|RefSeq:XP\_014500015.1};  
 -- HD1-like 1-like isoform 1 gene: Full=Characterized protein {ECO:0000313|EMBL:KCNW89937.1};  
 team-binding At4g11080 B protein in 13; Alternative Name: Full=Characterized protein {ECO:0000313|EMBL:BAT72999.1};  
 high mobility At5g23420 B protein gene: Full=Nucleoside B protein 7-like isoform X2 {ECO:0000313|RefSeq:X14500015.1};  
 team-binding At4g11080 protein 6 isoform 13; Alternative Name: Full=Characterized protein {ECO:0000313|EMBL:KRH41296.1, ECO:0000313|EnsemblPlant};  
 -- HD1-like 1-like isoform 1 gene: Full=Characterized protein {ECO:0000313|RefSeq:X14500015.1};  
 k transcript At3g22830 transcription factor A gene: Full=Homeobox transcription factor A-2 {ECO:0000313|EMBL:KRG95588.1, ECO:0000313|EnsemblPlant};  
 k transcript At1g46264 transcription factor B gene: Full=Homeobox transcription factor B-4-like {ECO:0000313|RefSeq:XP\_014500015.1};  
 k transcript At2g41690 transcription factor B gene: Full=Homeobox transcription factor B-4-like {ECO:0000313|RefSeq:XP\_014500015.1};  
 k transcript At4g36990 protein HSF2 at shock treatment: Full=Heat shock transcription factor HSF2 {ECO:0000313|RefSeq:XP\_014500015.1, ECO:0000313|EnsemblPlant};  
 k transcript At3g22830 transcription factor A gene: Full=Homeobox transcription factor A-2 {ECO:0000313|EMBL:KRG95588.1, ECO:0000313|EnsemblPlant};  
 k transcript At2g26150 transcription factor A-2 isoform 1 at shock treatment: Full=Homeobox transcription factor A-2 {ECO:0000313|RefSeq:XP\_014500015.1, ECO:0000313|EnsemblPlant};  
 -- At2g26150 transcription factor A-2 isoform 1 at shock treatment: Full=Homeobox transcription factor A-2 {ECO:0000313|RefSeq:XP\_014500015.1, ECO:0000313|EnsemblPlant};  
 k transcript -- transcription factor B-4-like {ECO:0000313|RefSeq:XP\_014500015.1};  
 k transcript At4g36990 protein HSF24 at shock treatment: Full=Heat shock transcription factor HSF24 {ECO:0000313|RefSeq:XP\_014500015.1, ECO:0000313|EnsemblPlant};  
 -- At5g05140 transcription mediator of characterized protein {ECO:0000313|EMBL:OIW03214.1};  
 -- At5g05140 transcription mediator of characterized protein {ECO:0000313|EMBL:OIW03214.1};  
 specific demethylase At3g07610 7605295 ##### specific demethylase 3B {ECO:0000313|EMBL:KYP331001.1};  
 -- At1g78280 isoform 1 gene: Full=Homeobox transcription factor HAT14-like 1 {ECO:0000313|EMBL:KRH53030.1, ECO:0000313|EnsemblPlant};  
 specific demethylase At3g07610 MJ25 isoform 1 ##### characterized protein {ECO:0000313|EMBL:ESW14774.1};  
 -- At1g78280 isoform 2 gene: Full=Homeobox transcription factor HAT14-like 1 {ECO:0000313|EMBL:KRH53030.1, ECO:0000313|EnsemblPlant};  
 steine and At1g10200 protein WL gene: Full=Homeobox transcription factor HAT14-like 1 {ECO:0000313|EMBL:KRH03352.1, ECO:0000313|EnsemblPlant};  
 -- At3g55770 protein WL gene: Full=Homeobox transcription factor HAT14-like 1 {ECO:0000313|EMBL:OIW89020.1};  
 -- At2g40470 protein WL gene: Full=Homeobox transcription factor HAT14-like 1 {ECO:0000313|EMBL:KRH64169.1, ECO:0000313|EnsemblPlant};  
 -- At5g66870 protein 3 gene: Full=Characterized protein {ECO:0000313|EMBL:BAU00182.1};  
 -- At2g30130 protein 12 gene: Full=Characterized protein {ECO:0000313|EMBL:EMJ19714.1};  
 -- At4g37540 protein WL gene: Full=Homeobox transcription factor HAT14-like 1 {ECO:0000313|EMBL:KRH77108.1, ECO:0000313|EnsemblPlant};  
 -- At5g66870 protein 3 gene: Full=Characterized protein {ECO:0000313|EMBL:BAU00182.1};  
 -- At2g20340 protein 1 isoform 1 gene: Full=Tyrosine decarboxylase 1 {ECO:0000313|EMBL:KYP62403.1};

-- At3g49940 protein 38 isoform 1 Name: Full-length protein {ECO:0000313|EMBL:KRG91097.1, ECO:0000313|EnsemblPlas};

-- At1g68510 protein 4 Name: Full-length protein {ECO:0000313|EMBL:KYP4444.1, ECO:0000313|EnsemblPlas};

-- At2g30130 protein 12 Name: Full-length protein {ECO:0000313|EMBL:EMJ19714.1};

-- At2g40470 protein 1 Name: Full-length protein {ECO:0000313|EMBL:KRH64169.1, ECO:0000313|EnsemblPlas};

-- At1g31320 protein 1 Name: Full-length protein {ECO:0000313|EMBL:KYP4343.1, ECO:0000313|EnsemblPlas};

-- At4g37540 protein 3 Name: Full-length protein {ECO:0000313|EMBL:KRH77108.1, ECO:0000313|EnsemblPlas};

DS-box trans At1g69120 LIFLOWE name: Full-length protein {ECO:0000313|EMBL:AFI08227.1};

DS-box trans At4g37940 TOR27 isoform 1 factor 27; 10313|EMBL:KRH16882.1, ECO:0000313|EnsemblPlas};

DS-box trans At3g54340 ADS1 isoform 1 Full-length transcription factor TM6 {ECO:0000313|EMBL:AEW4360.1, ECO:0000313|EnsemblPlas};

DS-box trans At1g69120 AULIFLADS-box characterized protein {ECO:0000313|EMBL:KJB07014.1, ECO:0000313|EnsemblPlas};

DS-box trans At3g54340 DEFICIEN1 Full-length transcription factor TM6 {ECO:0000313|EMBL:KRH51760.1, ECO:0000313|EnsemblPlas};

-- At3g54340 ADS1 isoform 1 Full-length transcription factor TM6 {ECO:0000313|EMBL:AEW4360.1, ECO:0000313|EnsemblPlas};

DS-box trans At3g54340 DEFICIEN1 Full-length transcription factor TM6 {ECO:0000313|EMBL:KRH51760.1, ECO:0000313|EnsemblPlas};

DS-box trans At2g42830 protein A-box protein characterized protein {ECO:0000313|EMBL:BAT88969.1, ECO:0000313|EnsemblPlas};

DS-box trans At1g69120 AULIFLOADS-box characterized protein {ECO:0000313|EMBL:KJB07014.1, ECO:0000313|EnsemblPlas};

DS-box trans At4g37940 TOR27 isoform 1 factor 27; 10313|EMBL:KRH16882.1, ECO:0000313|EnsemblPlas};

-box trans At5g48670 protein AC=Agamous characterized protein {ECO:0000313|EMBL:ESW35360.1};

-- At1g18750 AGL30 MADS-box-like MADS-box transcription factor 1 {ECO:0000313|EMBL:KYP7676.1, ECO:0000313|EnsemblPlas};

-- At1g18750 AGL30 MADS-box-like MADS-box transcription factor 1 {ECO:0000313|EMBL:KYP7676.1, ECO:0000313|EnsemblPlas};

-- At5g48670 protein AC=Agamous characterized protein {ECO:0000313|EMBL:ESW35360.1};

putative trans At2g42680 NGF1-like factor 1a: Full-length protein {ECO:0000313|EMBL:KYP450450.1, ECO:0000313|EnsemblPlas};

putative trans At2g42680 NGF1-like factor 1a: Full-length protein {ECO:0000313|EMBL:KYP450450.1, ECO:0000313|EnsemblPlas};

-- At5g07900 LOC10763 nTERF protein {ECO:0000313|EMBL:KEH32308.1};

domain-cor At5g55580 MTERF9, ##### nTERF protein {ECO:0000313|RefSeq:NM\_001080400.1, ECO:0000313|EnsemblPlas};

-- ##### nTERF protein {ECO:0000313|EMBL:KEH32308.1};

domain-cor At4g14600 RF5, chloroplast ##### protein {ECO:0000313|EMBL:KYP40824.1};

domain-cor At4g14600 MTERF5, c ##### protein {ECO:0000313|EMBL:KYP40824.1};

-- At3g61250 protein 308 [A00303] characterized protein {ECO:0000313|EMBL:ESW11886.1};

-- At5g04760 VARICAT1-like transcription factor 1-3-1B {ECO:0000313|EMBL:BAB8689.1, ECO:0000313|EnsemblPlas};

transcription At2g16720 MYB6 isoform 1 name: Full-length protein {ECO:0000313|EMBL:ESW09812.1};

transcription At4g38620 MYB6 name: Full-length protein {ECO:0000313|EMBL:KRH54016.1, ECO:0000313|EnsemblPlas};

transcription At3g12720 isoform 1 Myb homeobox transcription factor MYB86 {ECO:0000313|EMBL:KYP5907.1, ECO:0000313|EnsemblPlas};

-- At3g61250 protein 308 [A00303] characterized protein {ECO:0000313|EMBL:ESW11886.1};

transcription At2g37630 AS1 [Ar #####] transcription factor AS1 {ECO:0000313|EMBL:KHN48368.1, ECO:0000313|EnsemblPlas};

transcription -- B56 isoform 1 CSA {ECO:0000313|EMBL:KHN48368.1, ECO:0000313|EnsemblPlas};

transcription At5g11510 MYB3R-like protein 3R-4 {ECO:0000313|EMBL:KHN47505.1, ECO:0000313|EnsemblPlas};

-- At4g18770 MYB118-like transcription factor MYB108-like {ECO:0000313|RefSeq:XP\_014545.1, ECO:0000313|EnsemblPlas};

transcription At3g13540 MYB3-like protein 1 Name: Full-length protein {ECO:0000313|EMBL:KCW89883.1, ECO:0000313|EnsemblPlas};

-- At5g08520 SRM1 protein SRM characterized protein {ECO:0000313|EMBL:KOM46236.1, ECO:0000313|EnsemblPlas};

-- At5g08520 MYBS1 protein SRM-related protein 28 {ECO:0000313|EMBL:AHB5961.1, ECO:0000313|EnsemblPlas};

-- At5g04760 VARICAT1-like transcription factor J {ECO:0000313|EMBL:KYP69140.1};

-- At3g46130 B48 isoform 1 MYB48; A0313|EMBL:KRH10298.1, ECO:0000313|EnsemblPlas};

-- At2g38090 VARICAT1-like transcription factor B-related protein 30 {ECO:0000313|EMBL:AHB5961.1, ECO:0000313|EnsemblPlas};

transcription At5g49330 MYB12 ##### related protein {ECO:0000313|EMBL:BAF74782.1};

transcriptionAt1g66230NT1-like [DORANT1in ODORANT1 {ECO:0000313|EMBL:KYP67201.1};

transcriptionAt1g66390MYB90-like related protein factor MYB113 family {ECO:0000313|EMBL:KYP4

transcriptionAt3g13540 MYB6-like<Name: Faracterized protein {ECO:0000313|EMBL:BAT87828.

transcriptionAt3g01140n 306-like Med:11597cterized protein {ECO:0000313|EMBL:ESW30636.1};

7B; transcrAt5g11510 MYB3R-h 3R-4 {ECO:0000313|EMBL:KRH52681.1, ECO:0000313|EnsemblPlan

transcription -- -- ##### related protein {ECO:0000313|EMBL:BAF74782.1};

transcriptionAt1g22640MYB8-like MYB3; A tion repressor MYB4 {ECO:0000313|EMBL:KYP4257

transcription -- 7490672 is -- aracterized protein {ECO:0000313|EMBL:BAU02711.

transcriptionAt2g47190MYB108-likeO:000030 factor MYB108-like {ECO:0000313|RefSeq:XP\_0044

transcriptionAt4g01680sor MYB6 Full=Myb0313|EMBL:KRH68350.1, ECO:0000313|EnsemblPlar

transcriptionAt3g135401 protein-<Name: Fprotein {ECO:0000313|EnsemblPlants:GLYMA05G04

-- At5g58900VARICAT,ill=TranscrB-related protein 30 {ECO:0000313|EMBL:AHB5961

transcriptionAt3g13540r MYB5-like<Name: F factor MYB114-like {ECO:0000313|RefSeq:XP\_0045

transcriptionAt3g1810007644225 -- 1 LOC101490682 isoform X1 {ECO:0000313|RefSeq:2

transcriptionAt2g16720like isoforrFull=Antho aracterized protein {ECO:0000313|EMBL:BAT98311.

transcriptionAt2g16720like isoforrFull=Antho n factor WER-like {ECO:0000313|RefSeq:XP\_014515

transcriptionAt2g02820124 isoform: Full=Myt-related protein B {ECO:0000313|EMBL:KYP65850.1

transcriptionAt4g01680 MYB61 1 Full=Myb0313|EMBL:KRH68350.1, ECO:0000313|EnsemblPlar

7B; transcrAt5g023203R-3 isofoMed:1159R MYB protein 10 {ECO:0000313|EMBL:AHB59598.1

-- At1g4800078-like isofFull=Myb-cription factor {ECO:0000313|EMBL:AES61608.1};

-- At5g08520r SRM1 [Arotein SRMaracterized protein {ECO:0000313|EMBL:KOM46236.

7B; transcrAt4g32730MYB3R-1 | ##### 0313|EMBL:KRH52681.1, ECO:0000313|EnsemblPlan

-- -- y member -- aracterized protein {ECO:0000313|EMBL:OIW04845.

-- At1g07540ing proteinat-binding 0313|EMBL:KRH29780.1, ECO:0000313|EnsemblPlar

transcriptionAt5g40350YB108-likeFull=Myb-ctor MYB21 {ECO:0000313|EMBL:KHN14149.1}; Fla

transcriptionAt1g66230. ANT1 [Arb-related piaracterized protein {ECO:0000313|EMBL:BAT81263.

-- -- LOC10761 -- protein LOC101488688 {ECO:0000313|RefSeq:XP\_00

-- -- MYB6-like -- --

-- At2g21650DIALIS-lilFull=Transcterized protein {ECO:0000313|EMBL:ESW20833.1}

-- At3g16350 MYBS3 1 Full=Myb-protein LOC106762661 {ECO:0000313|RefSeq:XP\_01

-- At4g39250S-like 3 [A Full=TransB-related protein 26 {ECO:0000313|EMBL:AHB59612

-- -- LOC10761 -- aracterized protein {ECO:0000313|EMBL:KDO32728.

transcriptionAt3g09370 MYB3R-5Med:1159tor MYB65 {ECO:0000313|EMBL:ABH02910.1}; Fla

-- At3g09370 MYB3R-5Med:1159lated protein B {ECO:0000313|RefSeq:XP\_012568996

transcriptionAt5g15310 MYB34 1 ##### on factor MYB34 {ECO:0000313|RefSeq:XP\_0145180

-- At5g47390 MYBS3 1 Full=Myb-b-like protein J {ECO:0000313|EMBL:KYP54264.1};

transcription -- TT2-like 1 -- 2R3 MYB protein 8 {ECO:0000313|EMBL:AHB59596

-- At5g56840r MYBS3 Full=Myb-ption factor MYB1R1 {ECO:0000313|EMBL:KHN322

-- -- ding factor -- --

-- At4g39250S-like 3 [A Full=TransB-related protein 26 {ECO:0000313|EMBL:AHB59612

transcriptionAt2g47190MYB108-likeO:000030aracterized protein {ECO:0000313|EMBL:BAT86226.1

-- At1g70000 MYB1R1 ##### B-related protein 16 {ECO:0000313|EMBL:AHB59602

-- At2g46410 ETC3 isotion factor 1 and cpc, putative {ECO:0000313|EMBL:EEF32645.1

-- At3g16350r MYBS3 Full=Myb-ction factor family protein {ECO:0000313|EMBL:AES6

transcription -- B59 isoform -- acterized protein {ECO:0000313|EMBL:ACJ85039.1};



```

--      --      --      --      --
transcription --      -like isoform --      2R3 MYB protein 8 {ECO:0000313|EMBL:AHB59596
--      --      LOC10761 --      characterized protein {ECO:0000313|EMBL:ESW21075.1};
--      --      .OC107458 --      protein LOC101504548 {ECO:0000313|RefSeq:XP_00
--      --      .OC107478 --      protein LOC101488688 {ECO:0000313|RefSeq:XP_00
--      At2g46410 protein 2: transcription factor B-related protein 25 {ECO:0000313|EMBL:AHB5961
--      At2g46410 protein 2: transcription factor B-related protein 25 {ECO:0000313|EMBL:AHB5961
transcription At2g46410 factor ET: transcription factor TRY {ECO:0000313|EMBL:KYP67378.
--      At1g12260 protein 7 isoform ##### characterized protein {ECO:0000313|EMBL:ESW27620.1};
--      At1g56010 COTYLEDON-containing protein {ECO:0000313|EnsemblPlants:GLYMA13G18
--      At5g13180 containing protein AC083 {ECO:0000313|RefSeq:XP_00
--      At1g65910 protein 8 M-like protein {ECO:0000313|EMBL:KRH17271.1, ECO:0000313|EnsemblPlants
--      At4g17980 protein 4: 0000303|lin-containing protein 78 {ECO:0000313|EMBL:KYP54
--      At4g35580-like 9 [Ar58162]; Alt LOC101492664 isoform X2 {ECO:0000313|RefSeq:2
--      At5g61430 containing protein 13|PubMed|0313|EMBL:KRH56898.1, ECO:0000313|EnsemblPlants
--      At2g27300 protein 4 (=ANAC04) characterized protein {ECO:0000313|EMBL:BAT92104.
--      At5g18270 containing protein 1: 0000303|lin-containing protein 100-like {ECO:0000313|RefSeq:XP_0
--      At5g22380 protein 5 domain-cis-containing protein 90 {ECO:0000313|EMBL:KYP44
--      At4g17980 protein 8: 0000303|lin-containing protein 78 {ECO:0000313|EMBL:KYP54
--      At5g61430 protein 93|PubMed|0313|EMBL:KRH40060.1, ECO:0000313|EnsemblPlants
--      At5g13180 containing protein AC083 {ECO:0000313|RefSeq:XP_00
--      At1g56010 COTYLEDON-containing protein {ECO:0000313|EnsemblPlants:GLYMA13G18
--      At4g28500 containing protein 13|PubMed: lin-containing protein 73-like {ECO:0000313|RefSeq:XP_00
--      At1g69490 factor 29 AC029; Alt AC040486.1}; SubName: Full=NAC transcription factor
--      At5g53950 COTYLEDON domain-cis protein, IPR003441, putative {ECO:0000313|EMBL:EO
--      At4g28500 protein 73|PubMed: lin-containing protein 73-like {ECO:0000313|RefSeq:XP_00
--      At2g27300 protein 40 (=ANAC04) characterized protein {ECO:0000313|EMBL:BAT92104.
--      At2g27300 protein 40 (=ANAC04) characterized protein {ECO:0000313|EMBL:BAT92104.
--      --      factor 25-like NAC transcharacterized protein {ECO:0000313|EMBL:PIA40769.
--      At1g56010 COTYLEDON-containing protein PED COTYLEDON 3-like {ECO:0000313|RefSeq:XP_
--      At1g28470 protein 16|PubMed: lin-containing protein 8 {ECO:0000313|EMBL:KHN09
--      --      ing protein --      0313|EMBL:KRH34977.1, ECO:0000313|EnsemblPlants
--      At3g01600 MA RESP##### -containing protein 8 {ECO:0000313|RefSeq:XP_0044
--      At3g01600 SPONSE 1 ##### characterized protein {ECO:0000313|EMBL:OIW03013.
--      At5g61430 protein 103|PubMed|0313|EMBL:KRH56898.1, ECO:0000313|EnsemblPlants
--      At4g27410 protein 72 (=Short=NAC) transcription factor {ECO:0000313|EMBL:ACI42832.1
--      At1g61110 factor 25-like NAC transcharacterized protein {ECO:0000313|EMBL:ESW31277.1};
--      At4g28500 containing protein 13|PubMed: lin-containing protein 8 {ECO:0000313|EMBL:KHN15
--      At1g56010 COTYLEDON-containing protein PED COTYLEDON 3-like {ECO:0000313|RefSeq:XP_
--      At1g69490 factor 29 [AC029; Alt lin-containing protein 29 {ECO:0000313|EMBL:KYP44
--      At2g18060 protein 3 CO:0000313|eristem (NAM) protein {ECO:0000313|EMBL:OMO84
--      At4g29230 protein 73 isoform 1: 0000303|lin-containing protein 8 {ECO:0000313|EMBL:KYP61
--      At2g17040 factor 32 1: 0000303|lin-containing protein 94 {ECO:0000313|EMBL:K
--      At4g29230 protein 73 isoform 1: 0000303|lin-containing protein 8 {ECO:0000313|EMBL:KYP61
--      --      protein 26- --      --

```

-- At4g28500|g protein 7|PubMed:lin-containing protein 8 {ECO:0000313|EMBL:KHN15  
 -- At5g53950|TYLEDON domain-COTYLEDON 2-like {ECO:0000313|RefSeq:XP\_001070100.1};  
 -- g protein 7 --  
 -- At1g12260|in 7-like isoform 1|lin-containing protein 7 {ECO:0000313|EMBL:KYP55  
 lear transcr -- unit A-10-1 -- iption factor Y subunit A-10 {ECO:0000313|EMBL:KY  
 lear transcrAt5g06510|unit A-10 ranscription factor Y subunit A-10 {ECO:0000313|EMBL:KY  
 lear transcrAt5g12840|unit A-1 il; AltName:ription factor Y subunit A-9 {ECO:0000313|EMBL:KF  
 lear transcrAt1g72830|ubunit A-7unit A-3; Siption factor Y subunit A-3 {ECO:0000313|EMBL:KY  
 lear transcrAt4g14540|or Y subununit B-3; Sn factor Y subunit B-3-like {ECO:0000313|RefSeq:XP\_001070100.1};  
 lear transcrAt5g47640|r Y subuniunit B-2; Sn factor Y subunit B-3-like {ECO:0000313|RefSeq:XP\_001070100.1};  
 -- At1g07980|rotein 8 isoform 1|bMed:265aracterized protein {ECO:0000313|EMBL:BAT90596.1};  
 -- At1g56170|Y subunit unit C-2; SIAP5B {ECO:0000313|EMBL:ACB78194.1};  
 ear transcrijAt1g08970|Y subunit unit C-9; SIAP5B {ECO:0000313|EMBL:ACB78194.1};  
 -- At5g43250|on subunit -- sociated corepressor {ECO:0000313|EMBL:KYP75683.1};  
 ethylene rAt3g04580|N4 [Arachi4; EC=2.7.ne receptor {ECO:0000256|PIRNR:PIRNR026389};  
 d amphipatAt1g24190|Sin3-like listone dea0313|EMBL:KRH45772.1, ECO:0000313|EnsemblPla  
 -- At2g33350|protein 1-li -- aracterized protein {ECO:0000313|EMBL:OIV89998.1};  
 onent respAt3g57040|regulator Oresponse reacterized protein {ECO:0000313|EMBL:ESW09431.1};  
 -- At1g19270|like isoform 1|name: Full=0313|EMBL:KRH15044.1, ECO:0000313|EnsemblPla  
 -- At1g19270|lated 1 [Aname: Full=XP\_004509228.1, ECO:0000313|RefSeq:XP\_004509228.1];  
 -- At1g24190|rotein Sin3-listone dea0313|EMBL:KRH45772.1, ECO:0000313|EnsemblPla  
 -- At5g59990|STANS-li -- 0313|EMBL:KRH22973.1, ECO:0000313|EnsemblPla  
 ethylene rAt3g04580|4 [Arachis 4; EC=2.7.ne receptor {ECO:0000256|PIRNR:PIRNR026389};  
 onent respAt3g57040|tor ORR1(response reacterized protein {ECO:0000313|EMBL:ESW20933.1};  
 -- -- { 5A [Arac; AltName:ription factor {ECO:0000313|EMBL:ALA09269.1};  
 -- At5g53420|ANS-LIKie: Full=Prmotif protein {ECO:0000313|EMBL:AES58778.1};  
 ethylene rAt3g04580|4 [Arachis 4; EC=2.7.ne receptor {ECO:0000256|PIRNR:PIRNR026389};  
 -- At1g75540|protein 20 Protein LOD0313|EMBL:KRH05902.1, ECO:0000313|EnsemblPla  
 -- At5g10720|e isoform 2:0000305}0313|EMBL:KRH61622.1, ECO:0000313|EnsemblPla  
 ine kinase At5g35750|ase 4 [Arac ##### inase 1 {ECO:0000313|EMBL:ANQ89644.1}; Flags: F  
 -- At4g27310|ANS-LIK.tBBX31 {0313|EMBL:KRH10724.1, ECO:0000313|EnsemblPlar  
 -- At3g48100|regulator .response re0313|EMBL:KRH03376.1, ECO:0000313|EnsemblPla  
 onent respAt2g25180|tor ARR1R22 {ECO:t response regulator {ECO:0000256|PIRNR:PIRNR036  
 -- At1g19270|lated 1 [Aname: Full= protein 1 {ECO:0000313|EMBL:AKI32341.1}; Flags:  
 -- At2g31380|rotein 25 [J9]; AltNar0313|EMBL:KRH23214.1, ECO:0000313|EnsemblPlar  
 -- At1g19270|isoform X'ame: Full= protein 1 {ECO:0000313|EMBL:AKI32341.1}; Flags:  
 -- -- rotein 32 [. -- 0313|EMBL:KRH47291.1, ECO:0000313|EnsemblPlar  
 -- At5g57180|PPARATUROPLAS'0313|EMBL:KRH19102.1, ECO:0000313|EnsemblPla  
 -- At1g19270|ated 1 [Araame: Full=XP\_004509228.1, ECO:0000313|RefSeq:XP\_004509228.1];  
 -- At2g33350|in 1-like isoform 1 -- 0313|EMBL:KRH33593.1, ECO:0000313|EnsemblPlar  
 -- At5g22260|STERILI'PHD fingeprotein At1g33420 family {ECO:0000313|EMBL:KYP  
 HAT comAt3g14740|o1 isoform #####.de-1 isoform X1 {ECO:0000313|RefSeq:XP\_0045137  
 -- -- -- -- --  
 -- At5g58610|thylation 1 #####.in 4 {ECO:0000313|EMBL:KHN45144.1}; EC=3.6.4.  
 -- At5g36740|nding prot ##### aracterized protein {ECO:0000313|EMBL:OAY49724.1};

-- At5g58610\_7470574 is ##### aracterized protein {ECO:0000313|EMBL:OIW09535.1  
 somerases (I -- At4g02110 -- on regulator dpb11, putative {ECO:0000313|EMBL:KE  
 -- At5g53430ansferase A=Protein S0:0000256|SAAS:SAAS00591749}; EC=2.1.1.43 {EC  
 -- At5g53430ansferase A=Protein S0:0000256|SAAS:SAAS00591749}; EC=2.1.1.43 {EC  
 -- At5g58610\_LOC10764 ##### aracterized protein {ECO:0000313|EMBL:OIW09535.1  
 somerases (I -- n At4g02110 -- on regulator dpb11, putative {ECO:0000313|EMBL:KE  
 tin-proteinAt5g53430rase ATX3=Protein S0:0000256|SAAS:SAAS00591749}; EC=2.1.1.43 {EC  
 -- At3g60670/7483742 is -- 00313|EMBL:KRH37216.1, ECO:0000313|EnsemblPla  
 -- At3g60670LOC10760 -- cterized protein {ECO:0000313|EMBL:ESW13927.1};  
 -- At3g60670At3g50808 -- protein LOC107953547 {ECO:0000313|RefSeq:XP\_01  
 -- At3g60670LOC107457 -- cterized protein {ECO:0000313|EMBL:ESW13927.1};  
 -- -- -like APRR -- esponse regulator-like APRR5 {ECO:0000313|EMBL:1  
 pseudo-resAt5g24470r-like APRre regulatorresponse regulator-like APRR5 {ECO:0000313|EMBL:1  
 -- At2g43500P2 [Arachie: Full=NIaracterized protein {ECO:0000313|EMBL:KYP58419.1  
 -- At1g20640orm X1 [Ae: Full=NI00313|EMBL:KRH60929.1, ECO:0000313|EnsemblPla  
 -- At2g43500P2 [Arachise: Full=NIaracterized protein {ECO:0000313|EMBL:KYP58419.1  
 -- At2g43500 protein NLe: Full=NIaracterized protein {ECO:0000313|EMBL:KYP65998.1  
 -- At1g20640P4 [Arachie: Full=NI00313|EMBL:KRH60929.1, ECO:0000313|EnsemblPla  
 -- At2g33810ing-like prSquamosa moter-binding-like protein {ECO:0000256|PIRNR:PIR  
 -- At2g33810ke protein 3Squamosa moter-binding-like protein {ECO:0000256|PIRNR:PIR  
 -- At5g43270e protein 1Squamosa pomoter-binding-like protein {ECO:0000313|EMBL:AI  
 -- At5g43270ing-like prSquamosa omoter-binding-like protein {ECO:0000313|EMBL:AI  
 -- At1g53160ng protein 1Squamosa r-binding protein 1-like {ECO:0000313|RefSeq:XP\_01  
 -- At5g50670g-like protSquamosa pomoter-binding-like protein {ECO:0000313|EMBL:AI  
 -- At2g33810ng-like protSquamosa inding-like protein {ECO:0000313|EMBL:AID59213.  
 -- At5g43270e protein 1Squamosa pomoter-binding-like protein {ECO:0000313|EMBL:AI  
 -- At5g43270e protein 1Squamosa pomoter-binding-like protein {ECO:0000313|EMBL:AI  
 -- At1g53160ing proteinSquamosa r-binding-like protein {ECO:0000256|PIRNR:PIRNR0  
 -- At5g50670;-like proteSquamosa pomoter-binding-like protein {ECO:0000313|EMBL:AI  
 -- At5g50670g-like protSquamosa pomoter-binding-like protein {ECO:0000313|EMBL:AI  
 tin-proteinAt5g53430ase ATX5 il=Protein S;d protein {ECO:0000313|EMBL:KRG94189.1}; Flags  
 sine N-metAt4g30860ansferase Full=ASH1O:0000256|SAAS:SAAS00591749}; EC=2.1.1.43 {EC  
 -- At3g55080unit N-met ##### aracterized protein {ECO:0000313|EMBL:KRH36236.  
 -bisphosphAt1g14030ge subunit ##### subunit N-methyltransferase {ECO:0000313|EMBL:KI  
 -- At4g20120ALLY AC1 ##### 0313|EMBL:KRH37182.1, ECO:0000313|EnsemblPlan  
 N-methyltAt5g17240JP 40-like irotein SET0313|EMBL:KRH17268.1, ECO:0000313|EnsemblPla  
 -bisphosphAt1g14030e subunit N ##### 0313|EMBL:KRH50559.1, ECO:0000313|EnsemblPla  
 N-methyltAt3g07670ge subunit -- 0000313|EMBL:KRH17729.1, ECO:0000313|Ensembl  
 ibination pAt3g24340CLASSY 4ame: Full=haracterized protein {ECO:0000313|EMBL:OIW07626.  
 41; ATP-dAt5g66750\ helicase I ##### 0313|EMBL:KRH76800.1, ECO:0000313|EnsemblPlan  
 ibination pAt3g24340ein CLASSame: Full=haracterized protein {ECO:0000313|EMBL:OIW07626.  
 repair protAt5g43530 regulator c ##### 0313|EMBL:KRG90383.1, ECO:0000313|EnsemblPlar  
 41; ATP-dAt5g66750licase DD1 ##### 0313|EMBL:KRH76800.1, ECO:0000313|EnsemblPlan  
 repair protAt5g43530egulator of ##### 0313|EMBL:KRG90383.1, ECO:0000313|EnsemblPlar  
 -- At3g54280 Rab7-like ne: Full=Rcterized protein {ECO:0000313|EMBL:ESW31760.1};

on repair pAt1g03750 [Arachis iName: Full recombination protein RAD26-like {ECO:0000313|E

-- At3g54430ORDIUM protein LA70313|EMBL:KRH62844.1, ECO:0000313|EnsemblPla

-- At3g54430ORDIUM Protein LA70313|EMBL:KRH62844.1, ECO:0000313|EnsemblPla

-- At4g22360ng protein -- racterized protein {ECO:0000313|EMBL:OMO64703.1

-- At5g63700\_08430 isofull=Unchar0313|EMBL:KRH30822.1, ECO:0000313|EnsemblPla

-- At2g14880it UAF30 ; Short=Ataracterized protein {ECO:0000313|EMBL:OIW11184.1

-- At5g08430\_08430 isofull=Unchar0313|EMBL:KRH09302.1, ECO:0000313|EnsemblPla

-- At2g14880it UAF30 ; Short=Ataracterized protein {ECO:0000313|EMBL:OIW11184.1

-- At5g63700\_ At5g08430 -- ain-containing protein 44-like {ECO:0000313|RefSeq:

-- At4g22360ng protein -- racterized protein {ECO:0000313|EMBL:OMO64703.1

-- At3g48360ontaining i-containingmain-containing protein 2-like {ECO:0000313|RefSeq:

-- At1g79000ise HAC1-ferase HACaracterized protein {ECO:0000313|EMBL:OWM69462

-- At1g58100or TCP8 [Ae: Full=Tr0313|EMBL:KRH06094.1, ECO:0000313|EnsemblPla

-- At4g20270threonine-p kinase BArprotein {ECO:0000313|EnsemblPlants:GLYMA02G450

-- -- r TCP14 [A -- aracterized protein {ECO:0000313|EMBL:BAT76589.

-- -- r TCP3 [Ae: Full=Traracterized protein {ECO:0000313|EMBL:OIV99127.1

-- At1g58100r TCP8 [A1e: Full=Tr0313|EMBL:KRH26342.1, ECO:0000313|EnsemblPla

-- -- r TCP14 [ -- aracterized protein {ECO:0000313|EMBL:BAT76589.

-- -- r TCP3 [Ae: Full=Traracterized protein {ECO:0000313|EMBL:OIV99127.1

te ZIM dorAt5g209003B [Arach AltName: CCT motif protein {ECO:0000313|EMBL:AES92112.1

-- At4g32570form X2 [Ain TIFY 8 'rotein TIFY 8 {ECO:0000313|EMBL:KYP39560.1};

te ZIM dor -- 7 5A [Arac; AltName:0313|EMBL:KRH11175.1, ECO:0000313|EnsemblPlar

-- At2g346007 5A [Arac; AltName:0313|EMBL:KRH11175.1, ECO:0000313|EnsemblPlar

te ZIM dorAt2g346005A [Arach; AltName:0313|EMBL:KRH11175.1, ECO:0000313|EnsemblPlar

te ZIM dorAt5g209003B [Arach AltName: CCT motif protein {ECO:0000313|EMBL:AES92112.1

-- At4g32570oform X1 [in TIFY 8 'rotein TIFY 8 {ECO:0000313|EMBL:KYP39560.1};

; speckle-tyAt1g55760n-containinB/POZ domain-containing protein 4 {ECO:0000313|EMBL:KY

-- At5g19330TRACTINCT PROTEI INTERACTING WITH ABF2-like {ECO:0000313|Re

-- At5g13060TRACTINCT PROTEIINTERACTING WITH ABF2-like {ECO:0000313|Ref

-- At5g60050 protein AtB/POZ dontaining protein At5g60050 {ECO:0000313|RefSeq:XI

-- At2g41370in NPR5 [B/POZ domterized protein {ECO:0000313|EMBL:CCB55300.1};

-- At3g48360-containing-containingl protein {ECO:0000313|EnsemblPlants:GLYMA05G0

; speckle-tyAt2g39760ining proterotein 3; AI domain-containing protein 3 {ECO:0000313|RefSeq:2

; regulatorAt2g41370i NPR5 [AB/POZ dom0313|EMBL:KRH72058.1, ECO:0000313|EnsemblPla

; regulatorAt2g41370NPR5-like3/POZ domrotein NPR5-like {ECO:0000313|RefSeq:XP\_0188440

S-phase ki CE10580 soform X1ull=SKP1-IP1 component {ECO:0000313|EMBL:OMO85395.1};

; regulatorAt5g45110i NPR3 [APR4; AltNaatory protein NPR3 {ECO:0000313|EMBL:KHN22972

; speckle-tyAt2g39760ining proterotein 3; AI domain-containing protein 3 {ECO:0000313|RefSeq:2

; speckle-tyAt1g55760main-contaB/POZ do:terized protein {ECO:0000313|EMBL:AFK49561.1};

; regulatorAt5g45110in NPR3 [APR3; AltNaatory protein NPR3 {ECO:0000313|EMBL:KHN22972

-- At5g28300 factor GTII=GT2-LIK0313|EMBL:KRG96954.1, ECO:0000313|EnsemblPlar

-- At1g76890 factor GT-factor GT-iracterized protein {ECO:0000313|EMBL:KYP50558.1

-- At3g58630factor ASIlg protein lfactor ASIL1-like isoform X2 {ECO:0000313|RefSeq:X

-- -- factor GT -- ption factor GT-2-like {ECO:0000313|RefSeq:XP\_004

-- At1g76890actor GTL:factor GT-0313|EMBL:KRG96954.1, ECO:0000313|EnsemblPlar

-- -- r GTL2, p -- icterized protein {ECO:0000313|EMBL:EMJ09797.1};

-- -- factor GT- -- ption factor GT-2-like {ECO:0000313|RefSeq:XP\_004

-- -- factor GT-2 -- racterized protein {ECO:0000313|EMBL:KYP50557.1

-- At3g10040in DDB\_G -- :0000313|RefSeq:XP\_016691470.1, ECO:0000313|Ref

-- At5g01380factor GT-factor GT-anscription factor GT-3b {ECO:0000313|EMBL:KHN4

-- -- factor GT- -- --

-- At3g58630factor ASIlg protein 1factor ASIL1-like isoform X1 {ECO:0000313|RefSeq:X

-- At5g01380actor GT-3factor GT-anscription factor GT-3b {ECO:0000313|EMBL:KHN4

-- At1g16070tein 8 [Arall=Tubby-Ilike protein 8 {ECO:0000313|RefSeq:XP\_014500440.1

-- At1g16070tein 8 [Arall=Tubby-Ilike protein 8 {ECO:0000313|RefSeq:XP\_014500440.1

-- -- e F-box pr -- -like F-box protein {ECO:0000256|RuleBase:RU36112

-- -- e F-box pr -- -like F-box protein {ECO:0000256|RuleBase:RU36112

-- At4g28190TALA 1-lie: Full=PrULTRAPETALA 1 {ECO:0000313|EMBL:KYP68829

-- At4g31550ription factscription fa0313|EMBL:KRH19120.1, ECO:0000313|EnsemblPlar

WRKY trAt5g07100ription fact):0000303|0313|EMBL:KRH76058.1, ECO:0000313|EnsemblPlar

-- At4g04450 factor 6-lil=WRKY 00313|EMBL:KRH56160.1, ECO:0000313|EnsemblPla

-- -- ption facto -- / transcription factor 23 {ECO:0000313|RefSeq:XP\_00

-- At2g30590ription factscription faKY transcription factor 21 {ECO:0000313|EMBL:KHN

WRKY trAt2g37260l factor 44 :rotein TRAnscription factor 44 {ECO:0000313|EMBL:KYP708

-- At4g04450r 6 isoforml=WRKY 0313|EMBL:KRH36485.1, ECO:0000313|EnsemblPlar

WRKY tr: -- ription fact -- 0313|EMBL:KRH59972.1, ECO:0000313|EnsemblPla

-- At3g56400ription factscription faactor WRKY57 {ECO:0000313|EMBL:DAA80460.1};

-- At1g80840factor 40 iscription fa/ transcription factor 40 {ECO:0000313|RefSeq:XP\_00

WRKY trAt5g56270SIBA2-likeO:000030300313|EMBL:KRH00919.1, ECO:0000313|EnsemblPla

-- At1g80840l factor 40 scription facterized protein {ECO:0000313|EMBL:ESW33089.1};

-- At2g37260n factor 44:rotein TRAnscription factor {ECO:0000313|EMBL:ALA09266.1}

-- At4g23810ription factscription faKY transcription factor 53 {ECO:0000313|EMBL:KYP

-- At5g26170factor 50 iscription faracterized protein {ECO:0000313|EMBL:OIW09221.1

-- At2g30590ption factoscription faKY transcription factor 21 {ECO:0000313|EMBL:KHN

WRKY tr: -- ription fact -- 0313|EMBL:KRH59972.1, ECO:0000313|EnsemblPla

-- At3g58710factor 69 iscription fa0313|EMBL:KRH27073.1, ECO:0000313|EnsemblPlar

-- At4g26640l factor 20 scription fa)313|EMBL:KRH73864.1, ECO:0000313|EnsemblPlan

-- At4g11070ption factoscription faanscription factor {ECO:0000313|EMBL:ALA09256.1

-- At4g04450r 6 isoforml=WRKY 0313|EMBL:KRH36485.1, ECO:0000313|EnsemblPlar

-- -- ription fact -- --

WRKY trAt2g03340iption factnscription haracterized protein {ECO:0000313|EMBL:BAT83325.

-- -- rotein RPS -- 0313|EMBL:KRH59108.1, ECO:0000313|EnsemblPla

-- At5g24110ription factscription faanscription factor {ECO:0000313|EMBL:ALA09263.1

-- At3g56400l factor 70 scription faKY transcription factor 70 {ECO:0000313|EMBL:KYP

WRKY trAt5g56270r SUSIBA2O:0000303cterized protein {ECO:0000313|EMBL:ESW11719.1};

-- At2g30590ription factscription faKY transcription factor 21 {ECO:0000313|EMBL:KHN

-- At4g26640factor 20 iscription fa)313|EMBL:KRH73864.1, ECO:0000313|EnsemblPlan

-- At4g31550ption factoscription fa/RKY13 {ECO:0000313|EMBL:ABC26916.1};

XP\_014516537.1};  
nts:GLYMA12G07800.3};  
nts:GLYMA12G07800.3};  
1};  
nts:GLYMA04G03070.2};  
1};  
J07644.1};  
;  
J07643.1};  
J07643.1};  
P\_004496086.1};  
};  
;  
1};  
ling protein {ECO:0000313|EMBL:ABC69353.1};  
03.1};  
P\_004496086.1};  
nts:GLYMA13G38030.1};  
Seq:XP\_004485859.1};  
Seq:XP\_004485859.1};  
  
ES90761.2};  
i.1};  
3141.1};  
;  
J07644.1};  
  
nts:GLYMA02G11060.1};  
nts:GLYMA10G44041.2};  
nts:GLYMA10G44041.2};  
9};  
  
};  
  
9};  
  
};  
9};  
9};  
  
;  
};

nts:GLYMA14G08641.1};

l31454.1};

\_004501577.1};

KHN24997.1};

nts:GLYMA04G36750.2};

ragment;

;

1};

nts:GLYMA20G24268.1};

nts:GLYMA11G13220.3};

1};

};

};

};

};

};

};

nts:GLYMA10G27910.3};

nts:GLYMA10G27910.3};

.1};

;

nts:GLYMA20G37550.1};

};

.1};

691.1};

;

nts:GLYMA16G05390.2};

;

495284.1};

nts:GLYMA11G12450.3};

000313|EMBL:KHN17463.1};

;

9886.1};

9669.1};

25.1};

05138.1};

6.1}};  
nts:GLYMA07G03081.1}};  
9.1}};  
0000313|EMBL:KHN04892.1}};  
.1}};  
495284.1}};  
  
58.1}};  
nts:GLYMA20G37550.1}};  
92.1}};  
nts:GLYMA16G02320.2}};  
7.1}};  
;  
  
;  
ion 1 {ECO:0000313|EMBL:ACJ39211.1}};  
  
N21635.1}};  
;  
nts:GLYMA14G36370.1}};  
nts:GLYMA05G26490.1}};  
nts:GLYMA14G36370.1}};  
  
.}};  
}};  
45.1}};  
520018.1}};  
45.1}};  
nts:GLYMA19G42520.1}};  
05138.1}};  
;  
3.1}};  
1}};  
;  
nts:GLYMA13G44594.1}};  
52.1}};  
nts:GLYMA11G04690.1}};  
71.1}};  
25.1}};  
3.1}};  
P40713.1}};  
  
1}};  
Fragment;  
l}};



nts:GLYMA08G14840.4};  
379.1};  
285.2};  
MBL:KYP43908.1};  
23.1};

Fragment;  
000313|RefSeq:XP\_012571863.1};  
nts:GLYMA09G34170.1};

379.1};  
l};

nts:GLYMA14G38460.1};  
1};  
nts:GLYMA08G14840.4};  
-};  
3.1};  
2.1};

008.1};  
1};  
004497095.1};  
\_014502470.1};  
004497095.1};  
\_014502470.1};  
014511026.1};  
499844.1};  
;  
518806.1};  
68360.1}; SubName: Full=Dof19 {ECO:0000313|EMBL:AJG01739.1};

'\_016689061.1};  
68360.1}; SubName: Full=Dof19 {ECO:0000313|EMBL:AJG01739.1};  
l};  
499844.1};  
};  
;  
1};  
499844.1};  
518806.1};

ES72534.2};  
1};

Flags: Fragment;  
};  
497141.1};  
Fragment;  
nts:GLYMA11G07350.2};  
992};  
L:AES82392.1};  
;  
;  
992};  
2};  
1};  
1};  
.1};  
1};  
;  
nts:GLYMA10G39710.5};  
nts:GLYMA02G40960.3};  
901.1};  
nts:GLYMA01G06880.2};  
1};  
72.1};  
1};  
;  
12.1};  
;  
1};  
901.1};  
14502723.1};  
1};  
};  
;  
1};  
.1};  
388616.2};  
1};  
};  
1};  
nts:GLYMA18G07330.1};  
nts:GLYMA03G33700.1};  
nts:GLYMA02G40960.3};  
};  
nts:GLYMA10G29390.1};  
nts:GLYMA04G06660.1};  
1};

{ECO:0000313|EMBL:KHN03161.1};  
830.1};  
;  
88616.2};  
830.1};  
KYP76693.1};  
nts:GLYMA14G37100.1};  
nts:GLYMA14G37100.1};  
nts:GLYMA15G42820.1};  
nts:GLYMA01G44670.1};  
1};

508403.1};  
2\_014507184.1};  
.1};  
.1};  
1}; Flags: Fragment;  
HN24104.1};  
HN24104.1};  
1};  
04503105.1};  
ts:GLYMA01G39040.1};  
KYP53354.1};  
3H30918.1};  
1.1};  
P53013.1};  
nts:GLYMA14G39260.2};  
.1};  
l};

5392};  
04503105.1};  
KYP53354.1};  
nts:GLYMA19G32841.1};  
KYP35731.1};  
4979.1};  
ts:GLYMA01G39040.1};  
1.1};  
l};  
14520124.1};  
nts:GLYMA20G32770.1};  
l};  
1};  
1};

.1};  
.1};  
D:0000313|EMBL:KYP71767.1};

.};  
l};  
029.1};  
38.1};  
.};  
1};  
;  
2574062.1};  
37559.1};  
nts:GLYMA13G16924.1};  
1};  
4508379.1};  
nts:GLYMA01G35145.1};  
;  
nts:GLYMA14G10100.2};  
;  
1};  
nts:GLYMA17G35090.2};  
OX91227.1};  
1};

HN06836.1};  
014518680.1};  
516480.1, ECO:0000313|RefSeq:XP\_014516481.1};  
nts:GLYMA06G20230.1};  
P44343.1};  
nts:GLYMA15G01960.1};  
04515372.1};  
014518680.1};  
KYP33458.1};  
04509044.1};  
P70362.1};

313|EMBL:GAV63258.1};  
04509044.1};  
upper protein HAT5 isoform X2 {ECO:0000313|RefSeq:XP\_004489298.1};  
nts:GLYMA10G38280.2};  
nts:GLYMA12G10710.1};  
IN35655.1};

313|EMBL:GAV63258.1};  
1};  
HN06836.1};  
nts:GLYMA01G05230.1};  
;  
14502681.1};  
1};  
ADC35600.1};  
  
ADC35600.1};  
.1}; Flags: Fragment;  
  
186.1}; Flags: Fragment;  
neobox 13B2 {ECO:0000313|EMBL:AKN10293.1};  
077.1};  
06266.1};  
06266.1};  
.1};  
1};  
P\_004497257.1};  
Plants:GLYMA08G02550.1};  
P\_004497257.1};  
nts:GLYMA19G34210.1};  
4499941.1};  
nts:GLYMA03G29190.1};  
factor HSFB1 {ECO:0000313|EMBL:AFQ93674.1};  
nts:GLYMA19G34210.1};  
0313|RefSeq:XP\_014500016.1};  
5626.1};  
4499941.1};  
factor HSFB1 {ECO:0000313|EMBL:AFQ93674.1};  
1};  
1};  
31.1};  
nts:GLYMA06G10660.2};  
;  
nts:GLYMA06G10660.2};  
nts:GLYMA17G10030.2};  
l};  
nts:GLYMA04G39830.1};  
1};  
  
nts:GLYMA01G40010.1};  
1};  
1};

nts:GLYMA20G26910.1};  
4488.1};  
1};

nts:GLYMA04G39830.1};  
3652.1};  
nts:GLYMA01G40010.1};

nts:GLYMA14G36221.1};  
03.1};  
1};  
nts:GLYMA06G02990.1};  
03.1};  
nts:GLYMA06G02990.1};  
1};  
1};  
nts:GLYMA14G36221.1};

592.1};  
592.1};

43.1};  
43.1};

XP\_014505348.1};

: Fragment;  
: Fragment;  
;  
03.1};  
;  
nts:GLYMA06G16820.1};  
'5.1};  
;  
.1};  
G23455.1};  
.1};  
15544.1};  
.1};  
.1};  
4.1};

nts:GLYMA15G04620.1};  
6.1};

;
9242.1};
1};

its:GLYMA06G08660.1};

71.1};
1};
95885.1};
its:GLYMA03G38410.1};
900.1};
6.1};
08935.1};
XP\_004512739.1};
1};
5266.1};
};
its:GLYMA03G38410.1};
l};

.1};
its:GLYMA06G08660.1};
1};
nts:GLYMA11G14760.7};
ags: Fragment;
1};
04509512.1};

;
4502167.1};
2.1};
1};
gs: Fragment;
1};
062.1};

1};
12.1};

2.1};
1};
2.1};
};
57930.1};

.1};  
.  
04488477.1};  
04509512.1};  
1.1};  
1.1};  
1};  
;  
3620.2};  
14497474.1};  
nts:GLYMA14G39080.1};  
5267.1};  
XP\_012571948.1};  
nts:GLYMA05G00930.2};  
1};  
14491001.1};  
3893.1};  
5267.1};  
nts:GLYMA09G37050.1};  
14497474.1};  
3620.2};  
04487194.1};  
tor 29 {ECO:0000313|RefSeq:XP\_004490093.1};  
0Y13097.1};  
04487194.1};  
1};  
1};  
1};  
\_014495173.1};  
9961.1};  
nts:GLYMA10G36050.1};  
99395.1};  
1};  
nts:GLYMA05G00930.2};  
1};  
;  
5497.1};  
\_014495173.1};  
5399.1};  
1594.1};  
394.1};  
YP68073.1};  
394.1};



5497.1}};  
\_014500628.1}};

5393.1}};  
{P56960.1}};  
{P56960.1}};  
IN19456.1}};  
P62217.1}};  
'\_014523242.1}};  
'\_014523242.1}};  
1}};

3.1}};

nts:GLYMA08G40390.4}};  
-}};  
;  
nts:GLYMA14G07060.2}};  
29.1, ECO:0000313|RefSeq:XP\_012573712.1}};  
nts:GLYMA08G40390.4}};  
nts:GLYMA13G40610.2}};

;  
;

nts:GLYMA17G37430.2}};  
nts:GLYMA04G06190.2}};  
Fragment;  
nts:GLYMA15G07140.1}};  
nts:GLYMA17G10170.1}};  
5392}};  
Fragment;  
nts:GLYMA13G41980.1}};  
Fragment;  
nts:GLYMA07G02320.1}};  
nts:GLYMA13G00520.2}};  
29.1, ECO:0000313|RefSeq:XP\_012573712.1}};  
nts:GLYMA10G26990.1}};  
33289.1}};  
88.1}};

12 {ECO:0000313|EMBL:KHN45144.1}};  
1}};

1};  
H43208.1};  
O:0000256|PROSITE-ProRule:PRU00899, ECO:0000256|SAAS:SAAS00591749};  
O:0000256|PROSITE-ProRule:PRU00899, ECO:0000256|SAAS:SAAS00591749};  
1};  
H43208.1};  
O:0000256|PROSITE-ProRule:PRU00899, ECO:0000256|SAAS:SAAS00591749};  
nts:GLYMA09G05781.1};  
;  
l6744379.1};  
;  
KYP38831.1};  
KYP38831.1};  
1};  
nts:GLYMA04G01910.3};  
1};  
l};  
nts:GLYMA04G01910.3};  
NR037575};  
NR037575};  
D59210.1};  
D59216.1};  
l8814874.1};  
D59221.1};  
1}; Flags: Fragment;  
D59211.1};  
D59210.1};  
037575};  
D59219.1};  
D59219.1};  
: Fragment;  
O:0000256|SAAS:SAAS00591749};  
1};  
EH30792.1};  
nts:GLYMA09G05510.1};  
nts:GLYMA14G39060.1};  
nts:GLYMA07G35510.1};  
Plants:GLYMA13G11740.1};  
1};  
nts:GLYMA01G38150.1};  
1};  
nts:GLYMA20G21940.1};  
nts:GLYMA01G38150.1};  
nts:GLYMA20G21940.1};  
;

MBL:KHN28113.1}};  
nts:GLYMA04G17885.2}};  
nts:GLYMA04G17885.2}};  
1}};  
nts:GLYMA11G33015.6}};  
1}};  
nts:GLYMA16G33391.2}};  
1}};  
XP\_004494744.1}};  
1}};  
XP\_004515848.1}};  
1}};  
nts:GLYMA16G00580.1}};  
010.1}};  
1}};  
1}};  
nts:GLYMA12G28970.2}};  
1}};  
1}};  
1}};

nts:GLYMA15G09980.1}};  
nts:GLYMA15G09980.1}};  
nts:GLYMA15G09980.1}};  
1}};

TP76257.1}};  
fSeq:XP\_014524181.1}};  
fSeq:XP\_004493669.1}};  
P\_014493458.1}};

2863.1}};  
XP\_004503177.1}};  
nts:GLYMA02G34135.1}};  
030.1}};

1}};  
XP\_004503177.1}};

1}};  
nts:GLYMA19G43280.1}};  
1}};  
TP\_004505494.1}};  
496473.1}};  
nts:GLYMA19G43280.1}};

496473.1};  
};  
Seq:XP\_016691471.1};  
2520.1};  
  
P\_004505493.1};  
2520.1};  
1};  
1};  
5};  
5};  
0.1};  
nts:GLYMA13G00380.1};  
nts:GLYMA01G31921.1};  
nts:GLYMA06G46420.2};  
4495894.1};  
32331.1};  
31.1};  
nts:GLYMA09G00820.1};  
nts:GLYMA05G37390.2};  
SubName: Full=WRKY transcription factor {ECO:0000313|EMBL:ALA09265.1};  
4501381.1};  
nts:GLYMA18G47741.1};  
;  
};  
58634.1};  
};  
32331.1};  
nts:GLYMA05G37390.2};  
nts:GLYMA12G33990.1};  
ts:GLYMA02G46690.1};  
};  
nts:GLYMA09G00820.1};  
  
1};  
nts:GLYMA05G29921.2};  
};  
76652.1};  
;  
32331.1};  
ts:GLYMA02G46690.1};
