# Supplementary material for: Transcriptome and Metabolome Analysis Unveil Anthocyanin Metabolism in Pink and Red Testa of Peanut (Arachis hypogaea L.)
Source: Hindawi journal article supplement (doi:10.1155/2021/5883901), 2021-08-06
Supplement: f1 [file 5883901.f1.zip]

Table S2 Significantly changed metabolites between Shanhua15 and Zhonghua12

| Index   | Compounds                                 | Class        | Shanhua15 | Zhonghua12 |
|---------|-------------------------------------------|--------------|-----------|------------|
| pmb2959 | Cyanidin O-acetylhexoside                 | Anthocyanins | 6.89E+03  | 1.01E+05   |
| pme1773 | Cyanidin 3-O-rutinoside (Keracyanin)      | Anthocyanins | 4.63E+05  | 9.00E+00   |
| pme1793 | Pelargonin                                | Anthocyanins | 4.38E+04  | 1.07E+04   |
| pme3391 | Petunidin 3-O-glucoside                   | Anthocyanins | 5.19E+05  | 7.91E+06   |
| pmf0263 | Apigeninidin chloride                     | Anthocyanins | 4.08E+03  | 2.87E+04   |
| pmb2975 | Hesperetin O-Glucuronic acid              | Flavanone    | 9.00E+00  | 1.87E+04   |
| pme0371 | Naringenin 7-O-glucoside (Prunin)         | Flavanone    | 5.95E+05  | 9.09E+04   |
| pme2979 | Pinocembrin (Dihydrochrysin)              | Flavanone    | 9.32E+03  | 6.36E+04   |
| pme3464 | Isosakuranetin (4'-Methylnaringenin)      | Flavanone    | 6.57E+03  | 6.81E+04   |
| pma0724 | Naringenin C-hexoside                     | Flavone      | 2.15E+05  | 9.00E+00   |
| pma6199 | Chrysin O-hexoside                        | Flavone      | 1.59E+06  | 3.05E+05   |
| pma6558 | Velutin                                   | Flavone      | 2.35E+04  | 2.54E+05   |
| pmb0566 | Luteolin O-hexosyl-O-pentoside            | Flavone      | 1.91E+05  | 9.27E+03   |
| pmb0580 | Chrysin 5-O-glucoside (Toringin)          | Flavone      | 1.66E+06  | 2.93E+05   |
| pmb0605 | Apigenin 7-O-glucoside (Cosmosiin)        | Flavone      | 1.22E+05  | 9.00E+00   |
| pmb0607 | Chrysoeriol 7-O-hexoside                  | Flavone      | 1.10E+07  | 1.37E+06   |
| pmb0615 | Hesperetin C-hexosyl-O-hexosyl-O-hexoside | Flavone      | 3.96E+04  | 4.50E+05   |
| pmb0618 | 8-C-hexosyl-hesperetin O-hexoside         | Flavone      | 9.00E+00  | 1.28E+06   |
| pmb0645 | 6-C-hexosyl-hesperetin O-hexoside         | Flavone      | 9.54E+04  | 2.54E+06   |
| pmb0663 | 8-C-hexosyl-luteolin O-hexoside           | Flavone      | 4.37E+05  | 9.81E+06   |
| pmb0689 | Chrysoeriol C-hexoside                    | Flavone      | 2.99E+06  | 1.24E+05   |
| pmb0712 | Tricin 5-O-hexosyl-O-hexoside             | Flavone      | 5.23E+05  | 6.06E+06   |
| pmb0713 | Tricin 7-O-hexosyl-O-hexoside             | Flavone      | 6.46E+05  | 7.80E+06   |
| pmb0720 | Tricin O-malonylhexoside                  | Flavone      | 9.57E+06  | 9.00E+00   |
| pmb0724 | Tricin O-rhamnoside                       | Flavone      | 2.09E+05  | 6.97E+03   |
| pmb2954 | Luteolin O-hexosyl-O-hexosyl-O-hexoside   | Flavone      | 1.87E+04  | 2.62E+05   |
| pmb3000 | Chrysoeriol O-acetylhexoside              | Flavone      | 3.07E+05  | 1.99E+06   |
| pmb3046 | Tricin 7-O-hexoside                       | Flavone      | 2.71E+05  | 4.88E+06   |
| pmb3052 | Tricin 4'-O- $\beta$ -guaiacylglycerol    | Flavone      | 9.06E+03  | 3.16E+03   |
| pme2457 | Luteolin 7-O-glucoside (Cynaroside)       | Flavone      | 1.20E+06  | 1.48E+05   |
| pme1667 | Isovitexin 7-O-glucoside (Saponarin)      | Flavonoid    | 5.88E+04  | 9.00E+00   |
| pmf0246 | Orientin                                  | Flavonoid    | 5.65E+04  | 1.63E+04   |
| pmf0369 | Persicoside                               | Flavonoid    | 9.00E+00  | 2.37E+05   |
| pmf0371 | Pedalitin                                 | Flavonoid    | 4.28E+05  | 3.22E+06   |
| pmf0382 | 5,7-Dihydroxy-3',4',5'-trimethoxyflavone  | Flavonoid    | 1.09E+04  | 7.58E+04   |
| pma0214 | methyIQuercetin O-hexoside                | Flavonol     | 5.71E+05  | 1.30E+07   |
| pmb0565 | Syringetin 3-O-hexoside                   | Flavonol     | 1.68E+05  | 7.62E+05   |
| pmb0706 | Quercetin 5-O-malonylhexosyl-hexoside     | Flavonol     | 8.37E+04  | 6.71E+06   |
| pmb0709 | Quercetin 7-O-malonylhexosyl-hexoside     | Flavonol     | 1.64E+05  | 7.66E+06   |
| pmb3026 | Quercetin O-acetylhexoside                | Flavonol     | 5.48E+05  | 2.01E+07   |
| pme0196 | Kaempferol                                | Flavonol     | 1.11E+04  | 8.44E+04   |
| pme0197 | Quercetin 3-O-rutinoside (Rutin)          | Flavonol     | 1.85E+05  | 1.09E+06   |
| pme1500 | Kumatakenin                               | Flavonol     | 9.12E+03  | 1.01E+05   |
| pme1622 | Kaempferol 3-O-glucoside (Astragalin)     | Flavonol     | 1.44E+06  | 2.57E+05   |
| pme2895 | Dihydromyricetin                          | Flavonol     | 9.00E+00  | 2.67E+05   |
| pme3369 | Rhamnetin (7-O-methxyl quercetin)         | Flavonol     | 8.34E+03  | 5.83E+04   |
| pme3442 | Quercetin 7-O- $\beta$ -D-Glucuronide     | Flavonol     | 4.74E+05  | 2.92E+06   |
| pme3484 | Myricetin 3-O-galactoside                 | Flavonol     | 2.14E+03  | 2.69E+04   |
| pme3230 | Calycosin                                 | Isoflavone   | 7.79E+05  | 8.20E+04   |

|         |                                     |                   |          |          |
|---------|-------------------------------------|-------------------|----------|----------|
| pme3251 | Glycitein                           | Isoflavone        | 7.97E+05 | 8.31E+04 |
| pme3276 | 2'-Hydroxygenistein                 | Isoflavone        | 2.46E+05 | 9.47E+04 |
| pme3502 | Formononetin 7-O-glucoside (Ononin) | Isoflavone        | 9.00E+00 | 2.02E+04 |
| pmb2947 | Catechin-catechin-catechin          | Polyphenol        | 5.50E+06 | 5.94E+05 |
| pmb3114 | Epicatechin-epiafzelechin           | Polyphenol        | 5.05E+05 | 7.70E+04 |
| pme1486 | Epigallate catechin gallate (EGCG)  | Polyphenol        | 2.88E+04 | 9.00E+00 |
| pme1516 | Epigallocatechin (EGC)              | Polyphenol        | 6.91E+05 | 5.38E+06 |
| pme1535 | (+)-Gallocatechin (GC)              | Polyphenol        | 1.35E+05 | 1.72E+04 |
| pme1562 | Epicatechin gallate (ECG)           | Polyphenol        | 1.43E+04 | 1.53E+03 |
| pme2246 | Ellagic acid                        | Polyphenol        | 9.00E+00 | 4.27E+04 |
| pmf0345 | (-)-Epiafzelechin                   | Polyphenol        | 3.39E+05 | 4.05E+04 |
| pmf0379 | Gallocatechin gallate               | Polyphenol        | 3.28E+04 | 9.00E+00 |
| pme0434 | Procyanidin B2                      | Proanthocyanidins | 1.07E+06 | 1.22E+05 |
| pme0436 | Procyanidin B3                      | Proanthocyanidins | 1.10E+08 | 1.48E+07 |

testa

| VIP      | Fold_Change | LogFC     | Regulate |
|----------|-------------|-----------|----------|
| 1.27E+00 | 1.47E+01    | 3.88E+00  | up       |
| 2.56E+00 | 1.95E-05    | -1.56E+01 | down     |
| 1.12E+00 | 2.44E-01    | -2.03E+00 | down     |
| 1.11E+00 | 1.52E+01    | 3.93E+00  | up       |
| 1.07E+00 | 7.03E+00    | 2.81E+00  | up       |
| 2.15E+00 | 2.07E+03    | 1.10E+01  | up       |
| 1.07E+00 | 1.53E-01    | -2.71E+00 | down     |
| 1.05E+00 | 6.83E+00    | 2.77E+00  | up       |
| 1.20E+00 | 1.04E+01    | 3.37E+00  | up       |
| 2.47E+00 | 4.19E-05    | -1.45E+01 | down     |
| 1.03E+00 | 1.92E-01    | -2.38E+00 | down     |
| 1.17E+00 | 1.08E+01    | 3.43E+00  | up       |
| 1.88E+00 | 4.85E-02    | -4.37E+00 | down     |
| 1.30E+00 | 1.77E-01    | -2.50E+00 | down     |
| 1.69E+00 | 7.40E-05    | -1.37E+01 | down     |
| 1.13E+00 | 1.24E-01    | -3.01E+00 | down     |
| 1.15E+00 | 1.14E+01    | 3.51E+00  | up       |
| 2.66E+00 | 1.42E+05    | 1.71E+01  | up       |
| 1.40E+00 | 2.67E+01    | 4.74E+00  | up       |
| 1.30E+00 | 2.25E+01    | 4.49E+00  | up       |
| 1.58E+00 | 4.16E-02    | -4.59E+00 | down     |
| 1.07E+00 | 1.16E+01    | 3.53E+00  | up       |
| 1.09E+00 | 1.21E+01    | 3.59E+00  | up       |
| 2.90E+00 | 9.40E-07    | -2.00E+01 | down     |
| 1.93E+00 | 3.34E-02    | -4.91E+00 | down     |
| 1.20E+00 | 1.40E+01    | 3.81E+00  | up       |
| 1.06E+00 | 6.48E+00    | 2.70E+00  | up       |
| 1.31E+00 | 1.80E+01    | 4.17E+00  | up       |
| 1.40E+00 | 3.49E-01    | -1.52E+00 | down     |
| 1.12E+00 | 1.23E-01    | -3.02E+00 | down     |
| 2.31E+00 | 1.53E-04    | -1.27E+01 | down     |
| 1.08E+00 | 2.88E-01    | -1.80E+00 | down     |
| 2.48E+00 | 2.63E+04    | 1.47E+01  | up       |
| 1.10E+00 | 7.52E+00    | 2.91E+00  | up       |
| 1.08E+00 | 6.93E+00    | 2.79E+00  | up       |
| 1.28E+00 | 2.27E+01    | 4.50E+00  | up       |
| 1.16E+00 | 4.53E+00    | 2.18E+00  | up       |
| 1.60E+00 | 8.02E+01    | 6.33E+00  | up       |
| 1.50E+00 | 4.66E+01    | 5.54E+00  | up       |
| 1.45E+00 | 3.66E+01    | 5.19E+00  | up       |
| 1.26E+00 | 7.62E+00    | 2.93E+00  | up       |
| 1.04E+00 | 5.89E+00    | 2.56E+00  | up       |
| 1.17E+00 | 1.11E+01    | 3.47E+00  | up       |
| 1.02E+00 | 1.78E-01    | -2.49E+00 | down     |
| 2.49E+00 | 2.96E+04    | 1.49E+01  | up       |
| 1.07E+00 | 6.99E+00    | 2.81E+00  | up       |
| 1.04E+00 | 6.16E+00    | 2.62E+00  | up       |
| 1.68E+00 | 1.26E+01    | 3.65E+00  | up       |
| 1.16E+00 | 1.05E-01    | -3.25E+00 | down     |

|          |          |           |      |
|----------|----------|-----------|------|
| 1.17E+00 | 1.04E-01 | -3.26E+00 | down |
| 1.07E+00 | 3.84E-01 | -1.38E+00 | down |
| 2.16E+00 | 2.24E+03 | 1.11E+01  | up   |
| 1.16E+00 | 1.08E-01 | -3.21E+00 | down |
| 1.07E+00 | 1.52E-01 | -2.71E+00 | down |
| 1.49E+00 | 3.12E-04 | -1.16E+01 | down |
| 1.09E+00 | 7.78E+00 | 2.96E+00  | up   |
| 1.12E+00 | 1.27E-01 | -2.98E+00 | down |
| 1.56E+00 | 1.07E-01 | -3.23E+00 | down |
| 2.26E+00 | 4.75E+03 | 1.22E+01  | up   |
| 1.32E+00 | 1.19E-01 | -3.07E+00 | down |
| 1.51E+00 | 2.74E-04 | -1.18E+01 | down |
| 1.15E+00 | 1.14E-01 | -3.14E+00 | down |
| 1.10E+00 | 1.34E-01 | -2.90E+00 | down |
