# Supplementary material for: Transcriptome and Metabolome Analysis Unveil Anthocyanin Metabolism in Pink and Red Testa of Peanut (Arachis hypogaea L.)
Source: Hindawi journal article supplement (doi:10.1155/2021/5883901), 2021-08-06
Supplement: f1 [file 5883901.f1.zip]

Table S4 DEGs of flavonoid and anthocyanin biosynthesis in the testa of

| Gene name | ID                               | Shanhua15R | Shanhua15R | log2FoldChange |
|-----------|----------------------------------|------------|------------|----------------|
| PAL       | arahy.Tifrunner.gnm1.ann1.NB2RRK | 413        | 147        | -1.492         |
|           | arahy.Tifrunner.gnm1.ann1.PUMP6L | 4810       | 1025       | -2.231         |
| C4H       | arahy.Tifrunner.gnm1.ann1.AYA1A5 | 62         | 4          | -4.14          |
|           | arahy.Tifrunner.gnm1.ann1.K1LFJJ | 53         | 5          | -3.359         |
| 4CL       | arahy.Tifrunner.gnm1.ann1.SGZ2CH | 7874       | 3613       | -1.124         |
|           | arahy.Tifrunner.gnm1.ann1.35X8AA | 530        | 73         | -2.853         |
|           | arahy.Tifrunner.gnm1.ann1.7DZV4F | 17         | 0          | -6.641         |
|           | arahy.Tifrunner.gnm1.ann1.BDR360 | 137        | 40         | -1.771         |
|           | arahy.Tifrunner.gnm1.ann1.IT8P61 | 742        | 340        | -1.127         |
|           | arahy.Tifrunner.gnm1.ann1.L700WL | 79         | 282        | 1.841          |
|           | arahy.Tifrunner.gnm1.ann1.W43CKL | 643        | 1785       | 1.474          |
|           | arahy.Tifrunner.gnm1.ann1.6J3HHE | 110        | 38         | -1.549         |
| CHS       | arahy.Tifrunner.gnm1.ann1.ALW2B1 | 22         | 1095       | 5.634          |
|           | arahy.Tifrunner.gnm1.ann1.JH8TMD | 67         | 15         | -2.198         |
|           | arahy.Tifrunner.gnm1.ann1.K0UY8K | 117        | 19         | -2.618         |
|           | arahy.Tifrunner.gnm1.ann1.QZN0LQ | 111        | 10         | -3.551         |
|           | arahy.Tifrunner.gnm1.ann1.UDJX6I | 3893       | 1897       | -1.037         |
|           | arahy.Tifrunner.gnm1.ann1.79B99S | 2518       | 525        | -2.261         |
| F3H       | arahy.Tifrunner.gnm1.ann1.HE8J5U | 2687       | 685        | -1.973         |
|           | arahy.Tifrunner.gnm1.ann1.8F7PE4 | 3121       | 876        | -1.834         |
| F3'H      | arahy.Tifrunner.gnm1.ann1.K8H9R8 | 1769       | 453        | -1.966         |
|           | arahy.Tifrunner.gnm1.ann1.B0KX4P | 68         | 20         | -1.786         |
| DFR       | arahy.Tifrunner.gnm1.ann1.AQ6B1J | 909        | 128        | -2.826         |
|           | arahy.Tifrunner.gnm1.ann1.UQ0Z3E | 799        | 138        | -2.53          |
| ANS       | arahy.Tifrunner.gnm1.ann1.IK60LM | 753        | 106        | -2.824         |
|           | arahy.Tifrunner.gnm1.ann1.W8TDEC | 100        | 36         | -1.48          |
| ANR       | arahy.Tifrunner.gnm1.ann1.T1J2UZ | 643        | 6          | -6.76          |
|           | arahy.Tifrunner.gnm1.ann1.M05HM0 | 580        | 7          | -6.381         |
| LAR       | arahy.Tifrunner.gnm1.ann1.4WXU8P | 1840       | 113        | -4.018         |
|           | arahy.Tifrunner.gnm1.ann1.4Y1607 | 2828       | 174        | -4.018         |

## R4 and R7 stages of Shanhua15 and Zhonghua12 peanut

| pvalue   | FDR      | regulated | Name                | Chrom | Start    | End      | Strand | Length |
|----------|----------|-----------|---------------------|-------|----------|----------|--------|--------|
| 0.00151  | 0.018568 | down      | ahy.NB2R1inner.gnm1 |       | 1.46E+08 | 1.46E+08 | -      | 7414   |
| 7.2E-06  | 0.000252 | down      | ahy.PUMPinner.gnm1  |       | 42030770 | 42036927 | +      | 6158   |
| 5.38E-08 | 3.99E-06 | down      | ahy.AYA1inner.gnm1  |       | 2642047  | 2650511  | +      | 8465   |
| 8.01E-05 | 0.001857 | down      | ahy.K1LFinner.gnm1  |       | 8101429  | 8107794  | -      | 6366   |
| 0.002131 | 0.024098 | down      | ahy.SGZ2Cinner.gnm1 |       | 21279765 | 21284834 | +      | 5070   |
| 6.61E-06 | 0.000235 | down      | ahy.35X8Ainner.gnm1 |       | 1.48E+08 | 1.48E+08 | -      | 6568   |
| 0.000202 | 0.003955 | down      | ahy.7DZV4inner.gnm1 |       | 8358130  | 8363858  | -      | 5729   |
| 7.47E-08 | 5.25E-06 | down      | ahy.BDR3inner.gnm1  |       | 29365019 | 29368436 | -      | 3418   |
| 0.00022  | 0.004231 | down      | ahy.IT8P6inner.gnm1 |       | 96248067 | 96251891 | +      | 3825   |
| 1.28E-08 | 1.16E-06 | up        | ahy.L700Winner.gnm1 |       | 50725449 | 50731693 | +      | 6245   |
| 0.001335 | 0.016966 | up        | ahy.W43Cinner.gnm1  |       | 5092509  | 5096167  | -      | 3659   |
| 0.000204 | 0.00399  | down      | ahy.6J3HFinner.gnm1 |       | 18572663 | 18574554 | -      | 1892   |
| 3.79E-34 | 2.18E-30 | up        | ahy.ALW2inner.gnm1  |       | 1.29E+08 | 1.29E+08 | +      | 4179   |
| 0.001883 | 0.021999 | down      | ahy.JH8TMinner.gnm1 |       | 38986848 | 38988503 | +      | 1656   |
| 1.09E-09 | 1.29E-07 | down      | ahy.K0UYinner.gnm1  |       | 38961309 | 38963310 | -      | 2002   |
| 5.45E-13 | 1.5E-10  | down      | ahy.QZN0inner.gnm1  |       | 18595150 | 18597004 | +      | 1855   |
| 0.000722 | 0.010674 | down      | ahy.UDJXinner.gnm1  |       | 8632413  | 8635267  | -      | 2855   |
| 2.11E-12 | 4.88E-10 | down      | ahy.79B99inner.gnm1 |       | 11007083 | 11012015 | -      | 4933   |
| 4.86E-11 | 8.2E-09  | down      | ahy.HE8J5inner.gnm1 |       | 673566   | 679235   | +      | 5670   |
| 1.39E-11 | 2.6E-09  | down      | ahy.8F7PEinner.gnm1 |       | 1.3E+08  | 1.3E+08  | -      | 5438   |
| 5.81E-12 | 1.22E-09 | down      | ahy.K8H9inner.gnm1  |       | 1.06E+08 | 1.06E+08 | -      | 5230   |
| 0.004007 | 0.038214 | down      | ahy.B0KX4inner.gnm1 |       | 44757364 | 44760433 | -      | 3070   |
| 2.19E-27 | 6.79E-24 | down      | ahy.AQ6Binner.gnm1  |       | 12997611 | 12999986 | +      | 2376   |
| 4.91E-15 | 2.13E-12 | down      | ahy.UQ0Zinner.gnm1  |       | 13644667 | 13647176 | +      | 2510   |
| 2.65E-10 | 3.71E-08 | down      | ahy.IK60Linner.gnm1 |       | 1.17E+08 | 1.17E+08 | -      | 2631   |
| 5.3E-05  | 0.00132  | down      | ahy.W8TDinner.gnm1  |       | 1.26E+08 | 1.26E+08 | +      | 2680   |
| 5.81E-16 | 3.21E-13 | down      | ahy.T1J2Uinner.gnm1 |       | 1.1E+08  | 1.1E+08  | +      | 6039   |
| 6.42E-46 | 1.29E-41 | down      | ahy.M05Hinner.gnm1  |       | 1.19E+08 | 1.19E+08 | -      | 6084   |
| 6.09E-12 | 1.26E-09 | down      | ahy.4WXUinner.gnm1  |       | 19357631 | 19364660 | -      | 7030   |
| 2.57E-19 | 2.59E-16 | down      | ahy.4Y16Cinner.gnm1 |       | 24219840 | 24228275 | -      | 8436   |

| Type       | GO                     | KEGG         | KOG         | NR          | SwissProt                                   | TrEMBL                        |
|------------|------------------------|--------------|-------------|-------------|---------------------------------------------|-------------------------------|
| otein_codi | 0009800, cianine amm   | At3g53260    | nia-lyase   | henylalanin | 000256                                      | [RuleBase:RU003955]; E        |
| otein_codi | 0009800, cianine amm   | At2g37040    | nia-lyase   | henylalanin | 000256                                      | [RuleBase:RU003955]; E        |
| otein_codi | e 4-monooamate 4-mc    | At2g30490    | nooxygenc   | acid 4-hydr | acterized protein                           | {ECO:000031                   |
| otein_codi | e 4-monooamate 4-mc    | At2g30490    | nooxygenc   | acid 4-hydr | acterized protein                           | {ECO:000031                   |
| otein_codi | e 4-monooamate 4-mc    | At2g30490    | nooxygenc   | acid 4-hydr | 0313 EMBL:KRH17200.1, ECO:                  |                               |
| otein_codi | 524, ATP b             | arate--Co    | At3g21240   | e 2 isofor  | hort=4CL 0313 EMBL:KRH02884.1, ECO:         |                               |
| otein_codi | #####                  | arate--Co    | At1g62940   | igase-like  | C=6.2.1.-; A--CoA ligase-like 1 {ECO:00003  |                               |
| otein_codi | 0016874, li            | arate--Co    | At4g05160   | gase-like   | 7C=6.2.1.-; ;--CoA ligase-like 7 {ECO:00003 |                               |
| otein_codi | 524, ATP b             | arate--Co    | At3g21240   | gase 2-like | hort=4CL 0313 EMBL:KRH02884.1, ECO:         |                               |
| otein_codi | 0016874, li            | --           | At5g63380   | gase-like   | 9C=6.2.1.-; oA ligase-like protein {ECO:000 |                               |
| otein_codi | 0016874, li            | arate--Co    | At4g05160   | gase-like   | 7C=6.2.1.-; ;--CoA ligase-like 7 {ECO:00003 |                               |
| otein_codi | activity; Calcone synt | At5g13930    | ase 6 [Ara  | 7; EC=2.3.1 | one synthase {ECO:0000313 EM                |                               |
| otein_codi | activity; Calcone synt | At5g13930    | ase 6 [Ara  | 7; EC=2.3.1 | one synthase {ECO:0000313 EM                |                               |
| otein_codi | activity; Calcone synt | At5g13930    | ase 6 [Ara  | 7; EC=2.3.1 | one synthase {ECO:0000313 EM                |                               |
| otein_codi | activity; Calcone synt | At5g13930    | ase 6 [Ara  | 7; EC=2.3.1 | one synthase {ECO:0000313 EM                |                               |
| otein_codi | activity; Calcone synt | At5g13930    | ase 6 [Ara  | 7; EC=2.3.1 | one synthase {ECO:0000313 EM                |                               |
| otein_codi | 045486, nangenin 3-di  | At3g51240    | 3-dioxyge   | JniProtKB   | none-3-hydroxylase {ECO:0000                |                               |
| otein_codi | 045486, nangenin 3-di  | At3g51240    | e 3-dioxyge | JniProtKB   | none-3-hydroxylase {ECO:0000                |                               |
| otein_codi | 3'-monoox              | oid 3'-mor   | At5g07990   | xygenase    | [21; AltNan=F3'H {ECO:0000313 EMBL:AE       |                               |
| otein_codi | 3'-monoox              | oid 3'-mor   | At5g07990   | xygenase    | [21; AltNan=F3'H {ECO:0000313 EMBL:AE       |                               |
| otein_codi | ity; GO:00             | ctone reduct | At2g45400   | ctase [Ara  | Full=Vestitflavonol-4-reductase {ECO:0000   |                               |
| otein_codi | O:0046872, cyanidin di | At4g22880    | dioxygenc   | 4.11.19 {E  | hocyandin synthase {ECO:00003               |                               |
| otein_codi | O:0046872, cyanidin di | At4g22880    | dioxygenc   | 4.11.19 {E  | hocyandin synthase {ECO:00003               |                               |
| otein_codi | reductase c            | yanidin re   | At1g61720   | -flavan-3-  | CB:Q5FB3                                    | cyandin reductase {ECO:00003  |
| otein_codi | reductase c            | yanidin re   | At1g61720   | -flavan-3-  | CB:Q5FB3                                    | cyandin reductase {ECO:00003  |
| otein_codi | ivity; GO:(hocyandin   | At1g75290    | eductase    | lin reducta | andin reductase LAR1-2 {ECO:00              |                               |
| otein_codi | ivity; GO:(hocyandin   | At1g75290    | eductase    | lin reducta | andin reductase LAR1-2 {ECO:00              |                               |
| otein_codi | irbic acid bi          | onol syntha  | At5g08640   | e 3-hydrox  | .14.11.23                                   | hol synthase {ECO:0000313 EMI |
| otein_codi | irbic acid bi          | onol syntha  | At5g08640   | ne 3-hydr   | .14.11.23                                   | pnol synthase {ECO:0000313 EM |

3C=4.3.1.24 {ECO:0000256|RuleBase:RU003955};  
C=4.3.1.24 {ECO:0000256|RuleBase:RU003955};  
3|EMBL:KDP45711.1};  
3|EMBL:KDP45711.1};  
:0000313|EnsemblPlants:GLYMA14G38580.1};  
:0000313|EnsemblPlants:GLYMA17G07170.1};  
:13|RefSeq:XP\_004516098.1};  
:13|RefSeq:XP\_014498368.1};  
:0000313|EnsemblPlants:GLYMA17G07170.1};  
0313|EMBL:AES72328.1};  
:13|RefSeq:XP\_014498368.1};  
IBL:AAO32821.1};  
|EMBL:AID59203.1};  
IBL:AAO32821.1};  
IBL:AAO32821.1};  
IBL:AAO32821.1};  
IBL:ACB78187.1};  
313|EMBL:AID59205.1};  
313|EMBL:AID59205.1};  
3X07282.1};  
3X07282.1};  
313|EMBL:KYP52299.1};  
:13|EMBL:AID59207.1};  
:13|EMBL:AID59207.1};  
13|EMBL:AJF94633.1};  
13|EMBL:AJF94633.1};  
00313|EMBL:ABC71325.1};  
00313|EMBL:ABC71325.1};  
3L:BAF49296.1};  
IBL:BAF31231.1};
