# Supplementary material for: Transcriptome and Metabolome Analysis Unveil Anthocyanin Metabolism in Pink and Red Testa of Peanut (Arachis hypogaea L.)
Source: Hindawi journal article supplement (doi:10.1155/2021/5883901), 2021-08-06
Supplement: f1 [file 5883901.f1.zip]

Table S3 Summary of the sequencing and de novo assembly

| Samples     | raw_reads | clean_reads | Total mapped | clean_bases | error_rate | Q20    |
|-------------|-----------|-------------|--------------|-------------|------------|--------|
| S4-1        | 55799260  | 55216442    | 46977288     | 8282466300  | 0.365      | 97     |
| S4-2        | 52581942  | 51933798    | 43959566     | 7790069700  | 0.345      | 97.195 |
| S4-3        | 64718080  | 64270062    | 54187442     | 9640509300  | 0.345      | 97.195 |
| S7-1        | 59889128  | 59443644    | 51038882     | 8916546600  | 0.355      | 97.1   |
| S7-2        | 61166972  | 60444520    | 51740942     | 9066678000  | 0.335      | 97.285 |
| S7-3        | 58975466  | 58328988    | 49660617     | 8749348200  | 0.345      | 97.18  |
| Z4-1        | 58275958  | 57771286    | 48838904     | 8665692900  | 0.365      | 96.975 |
| Z4-2        | 58295876  | 57658526    | 48628565     | 8648778900  | 0.36       | 97.03  |
| Z4-3        | 55297900  | 54401188    | 45260740     | 8160178200  | 0.33       | 97.415 |
| Z7-1        | 51008880  | 50406664    | 43170287     | 7560999600  | 0.43       | 96.24  |
| Z7-2        | 48025548  | 47570326    | 40555926     | 7135548900  | 0.365      | 96.97  |
| <u>Z7-3</u> | 49785996  | 48144990    | 40494280     | 7221748500  | 0.35       | 97.12  |

| y   |        |        |
|-----|--------|--------|
| Q30 |        | GC (%) |
|     | 91.955 | 44.215 |
|     | 92.375 | 44.21  |
|     | 92.425 | 44.55  |
|     | 92.195 | 44.61  |
|     | 92.57  | 44.285 |
|     | 92.39  | 44.1   |
|     | 91.9   | 44.215 |
|     | 92.03  | 44.16  |
|     | 92.85  | 44.14  |
|     | 90.12  | 44.08  |
|     | 91.95  | 44.185 |
|     | 92.28  | 43.905 |
