# Supplementary figures and images for: Transcriptome and Metabolome Analysis Unveil Anthocyanin Metabolism in Pink and Red Testa of Peanut (Arachis hypogaea L.)
Source: Hindawi journal article supplement (doi:10.1155/2021/5883901), 2021-08-06

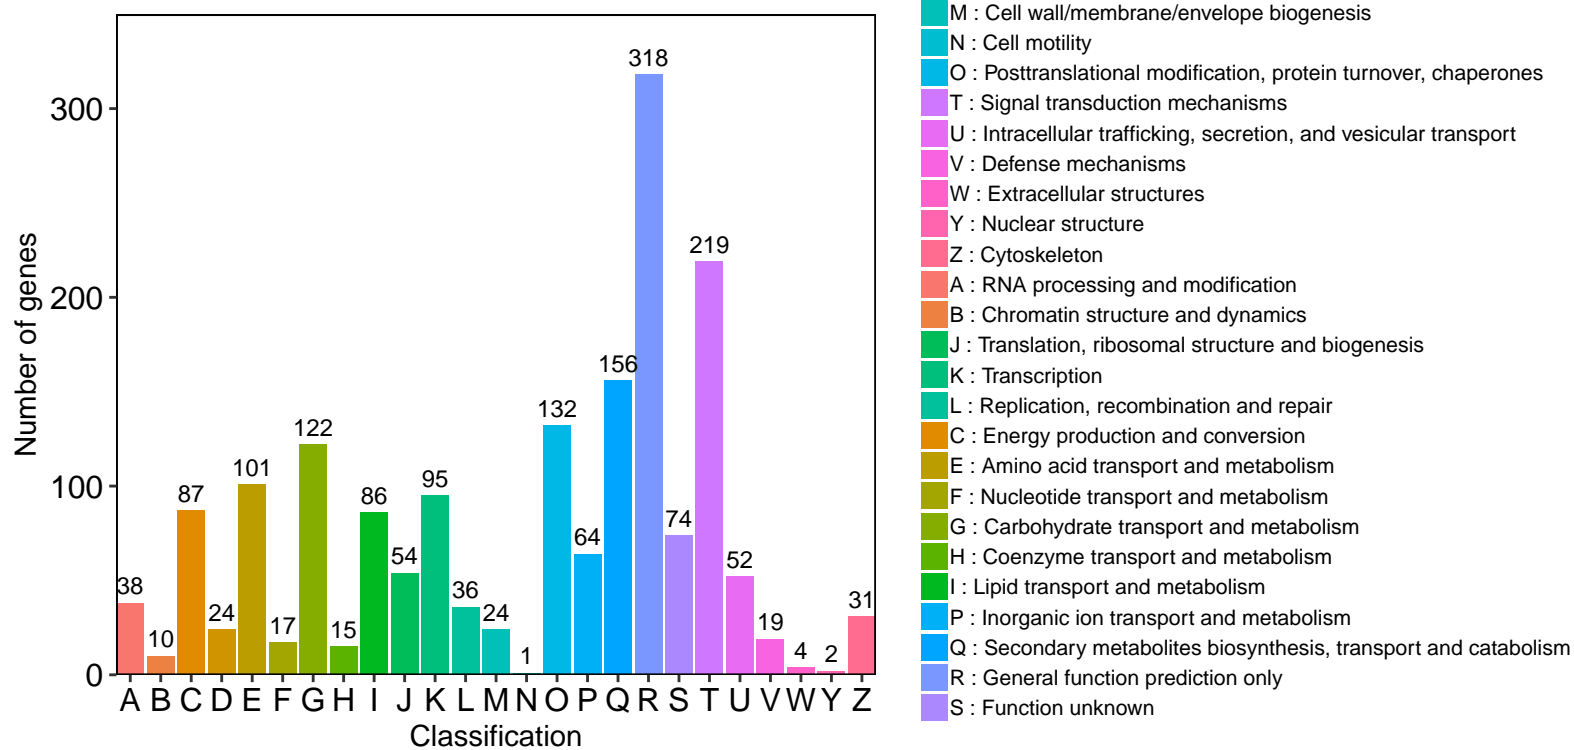

Supplement: f1 [file 5883901.f1.zip]

GO Classification

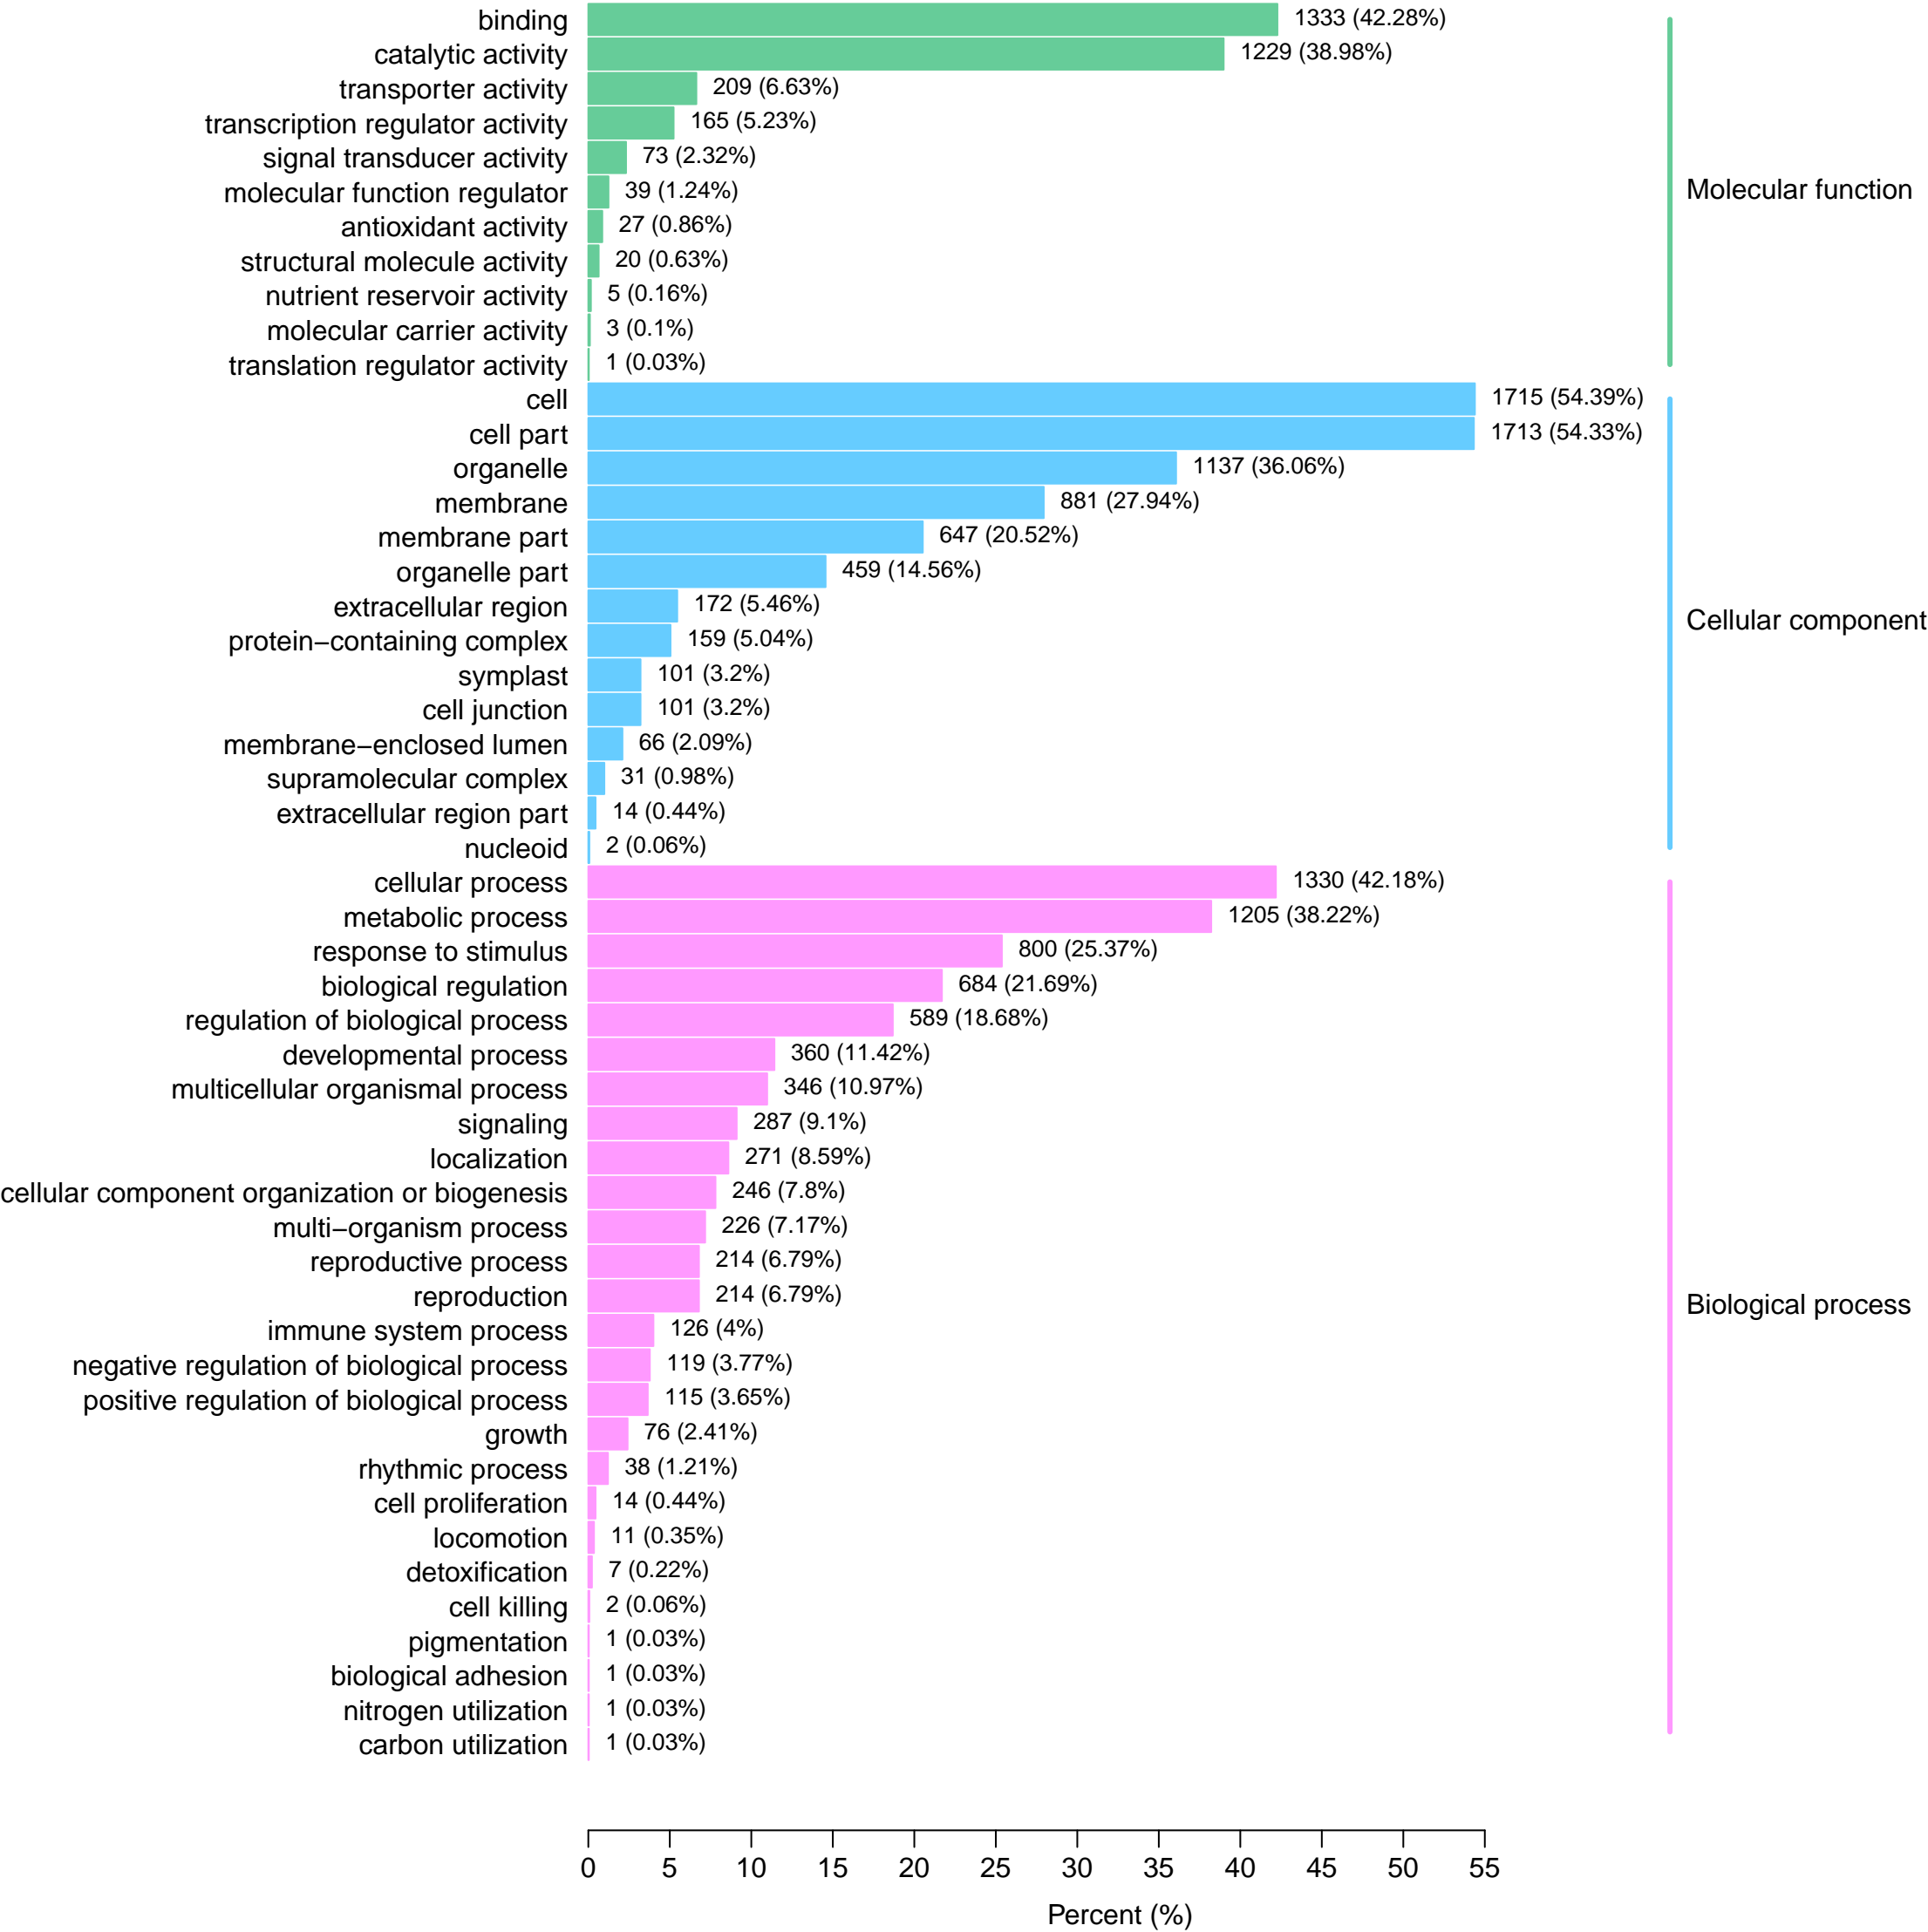

Supplement: f1 [file 5883901.f1.zip]
